# Supplementary material for: Easy chairs: the conformational preferences of polyfluorocyclohexanes
Source: Royal Society of Chemistry journal article supplement (doi:10.1039/c3ra40538a), 2013-01-01
Supplement: c3ra40538a.pdf [file c3ra40538a.pdf]

| Description        | No. of Fluorines | Index | Shape | Conformer         | Total Energy   |           | Relative Energy |          | Boltzmann Ratios | DF-MP2 Overall Relative Energy |
|--------------------|------------------|-------|-------|-------------------|----------------|-----------|-----------------|----------|------------------|--------------------------------|
|                    |                  |       |       |                   | cc-pVTZ DF-MP2 | DZP MP2   | DF-MP2 rel.     | MP2 rel. |                  |                                |
| fluorocyclohexane  | 1                | 2     | chair | equatorial        | -334.4619      | -334.1489 | 0.000           | 0.000    | 1.00             | 0.000                          |
|                    | 1                | 1     | chair | axial             | -334.4619      | -334.1488 | 0.029           | 0.111    | 0.95             | 0.029                          |
|                    | 1                | 3     | boat  |                   | -334.4529      | -334.1394 | 5.673           | 6.015    |                  | 5.673                          |
|                    | 1                | 5     | boat  |                   | -334.4524      | -334.1390 | 6.000           | 6.222    |                  | 6.000                          |
|                    | 1                | 4     | boat  |                   | -334.4513      | -334.1381 | 6.648           | 6.789    |                  | 6.648                          |
| trans-1,2-difluoro | 2                | 7     | chair | diaxial           | -433.5919      | -433.1910 | 0.000           | 0.000    | 1.00             | 2.431                          |
|                    | 2                | 9     | chair | diequatorial      | -433.5914      | -433.1906 | 0.326           | 0.263    | 0.58             | 2.757                          |
|                    | 2                | 10    | boat  |                   | -433.5831      | -433.1821 | 5.541           | 5.594    |                  | 7.972                          |
|                    | 2                | 11    | boat  |                   | -433.5826      | -433.1819 | 5.852           | 5.743    |                  | 8.283                          |
|                    | 2                | 18    | boat  |                   | -433.5827      | -433.1828 | 5.750           | 5.192    |                  | 8.181                          |
|                    | 2                | 20    | boat  |                   | -433.5797      | -433.1789 | 7.649           | 7.631    |                  | 10.080                         |
| cis-1,2-difluoro   | 2                | 8     | chair | ax, eq            | -433.5912      | -433.1904 | 0.000           | 0.000    |                  | 2.861                          |
|                    | 2                | 19    | boat  |                   | -433.5821      | -433.1812 | 5.695           | 5.785    |                  | 8.555                          |
| cis-1,3-difluoro   | 2                | 4     | chair | diaxial           | -433.5912      | -433.1904 | 1.174           | 1.202    | 0.14             | 2.872                          |
|                    | 2                | 6     | chair | diequatorial      | -433.5931      | -433.1923 | 0.000           | 0.000    | 1.00             | 1.698                          |
|                    | 2                | 12    | boat  |                   | -433.5845      | -433.1837 | 5.364           | 5.426    |                  | 7.062                          |
|                    | 2                | 21    | boat  |                   | -433.5837      | -433.1828 | 5.896           | 5.986    |                  | 7.594                          |
|                    | 2                | 24    | boat  |                   | -433.5832      | -433.1823 | 6.189           | 6.293    |                  | 7.888                          |
| trans-1,3-difluoro | 2                | 5     | chair | axial, equatorial | -433.5941      | -433.1935 | 0.000           | 0.000    |                  | 1.028                          |
|                    | 2                | 13    | boat  |                   | -433.5869      | -433.1858 | 4.547           | 4.832    |                  | 5.574                          |
|                    | 2                | 14    | boat  |                   | -433.5827      | -433.1819 | 7.186           | 7.285    |                  | 8.214                          |
|                    | 2                | 22    | boat  |                   | -433.5857      | -433.1849 | 5.274           | 5.422    |                  | 6.302                          |
|                    | 2                | 23    | boat  |                   | -433.5836      | -433.1829 | 6.631           | 6.629    |                  | 7.659                          |
| trans-1,4-difluoro | 2                | 1     | chair | diaxial           | -433.5958      | -433.1951 | 0.000           | 0.000    | 1.00             | 0.000                          |
|                    | 2                | 3     | chair | diequatorial      | -433.5938      | -433.1932 | 1.202           | 1.193    | 0.13             | 1.202                          |
|                    | 2                | 15    | boat  |                   | -433.5857      | -433.1848 | 6.344           | 6.469    |                  | 6.344                          |
|                    | 2                | 25    | boat  |                   | -433.5856      | -433.1848 | 6.358           | 6.460    |                  | 6.358                          |
|                    | 2                | 2     | chair | axial, equatorial | -433.5945      | -433.1938 | 0.000           | 0.000    |                  | 0.785                          |

|                         |   |    |                     |               |           |           |       |       |      |       |
|-------------------------|---|----|---------------------|---------------|-----------|-----------|-------|-------|------|-------|
| cis-1,4-difluoro        | 2 | 16 | boat                |               | -433.5833 | -433.1821 | 7.036 | 7.344 |      | 7.821 |
|                         | 2 | 17 | boat                |               | -433.5831 | -433.1822 | 7.141 | 7.295 |      | 7.927 |
|                         | 2 | 26 | boat                |               | -433.5851 | -433.1842 | 5.890 | 6.018 |      | 6.676 |
|                         |   |    |                     |               |           |           |       |       |      |       |
| r-1, t-2, c-3-trifluoro | 3 | 13 | chair               | triaxial      | -532.7172 | -532.2285 | 0.948 | 0.899 | 0.20 | 4.253 |
|                         | 3 | 18 | chair               | triequatorial | -532.7187 | -532.2299 | 0.000 | 0.000 | 1.00 | 3.305 |
|                         |   |    |                     |               |           |           |       |       |      |       |
|                         | 3 | 19 | boat                |               | -532.7121 | -532.2236 | 4.143 | 3.946 |      | 7.448 |
|                         | 3 | 36 | boat                |               | -532.7104 | -532.2217 | 5.237 | 5.117 |      | 8.542 |
|                         |   |    |                     |               |           |           |       |       |      |       |
| r-1, t-2, t-3-trifluoro | 3 | 14 | chair               | 1ax, 2ax, 3eq | -532.7198 | -532.2312 | 0.000 | 0.000 | 1.00 | 2.629 |
|                         | 3 | 16 | chair               | 1eq, 2eq, 3ax | -532.7195 | -532.2307 | 0.212 | 0.291 | 0.70 | 2.841 |
|                         |   |    |                     |               |           |           |       |       |      |       |
|                         | 3 | 20 | boat                |               | -532.7103 | -532.2215 | 5.950 | 6.040 |      | 8.579 |
|                         | 3 | 37 | boat                |               | -532.7106 | -532.2221 | 5.774 | 5.721 |      | 8.403 |
|                         |   |    |                     |               |           |           |       |       |      |       |
| r-1, c-2, c-3-trifluoro | 3 | 15 | chair               | 1ax, 2eq, 3ax | -532.7156 | -532.2268 | 1.899 | 1.855 | 0.04 | 5.284 |
|                         | 3 | 17 | chair               | 1eq, 2ax, 3eq | -532.7186 | -532.2297 | 0.000 | 0.000 | 1.00 | 3.386 |
|                         |   |    | no boats considered |               |           |           |       |       |      |       |
|                         |   |    |                     |               |           |           |       |       |      |       |
| r-1, t-2, t-4-trifluoro | 3 | 5  | chair               | triaxial      | -532.7215 | -532.2329 | 0.000 | 0.000 | 1.00 | 1.574 |
|                         | 3 | 12 | chair               | triequatorial | -532.7213 | -532.2325 | 0.099 | 0.220 | 0.85 | 1.674 |
|                         |   |    |                     |               |           |           |       |       |      |       |
|                         | 3 | 21 | boat                |               | -532.7136 | -532.2248 | 4.952 | 5.043 |      | 6.526 |
|                         | 3 | 27 | boat                |               | -532.7139 | -532.2254 | 4.768 | 4.685 |      | 6.342 |
|                         | 3 | 28 | boat                |               | -532.7133 | -532.2246 | 5.156 | 5.174 |      | 6.731 |
|                         | 3 | 35 | boat                |               | -532.7140 | -532.2255 | 4.701 | 4.636 |      | 6.275 |
|                         | 3 | 40 | boat                |               | -532.7129 | -532.2243 | 5.363 | 5.395 |      | 6.937 |
|                         |   |    |                     |               |           |           |       |       |      |       |
| r-1, t-2, c-4-trifluoro | 3 | 6  | chair               | ax, ax, eq    | -532.7232 | -532.2347 | 0.000 | 0.000 | 1.00 | 0.470 |
|                         | 3 | 11 | chair               | eq, eq, ax    | -532.7228 | -532.2342 | 0.289 | 0.300 | 0.61 | 0.758 |
|                         |   |    |                     |               |           |           |       |       |      |       |
|                         | 3 | 22 | boat                |               | -532.7125 | -532.2238 | 6.761 | 6.817 |      | 7.230 |
|                         | 3 | 26 | boat                |               | -532.7129 | -532.2244 | 6.482 | 6.475 |      | 6.952 |
|                         | 3 | 29 | boat                |               | -532.7149 | -532.2263 | 5.249 | 5.253 |      | 5.719 |
|                         | 3 | 34 | boat                |               | -532.7138 | -532.2255 | 5.894 | 5.756 |      | 6.364 |
|                         | 3 | 43 | boat                |               | -532.7128 | -532.2239 | 6.525 | 6.732 |      | 6.995 |
|                         |   |    |                     |               |           |           |       |       |      |       |
|                         |   |    |                     |               |           |           |       |       |      |       |
|                         | 3 | 7  | chair               | ax, eq, ax    | -532.7239 | -532.2353 | 0.000 | 0.000 | 1.00 | 0.082 |

|                                |   |    |       |                |           |           |       |       |       |       |
|--------------------------------|---|----|-------|----------------|-----------|-----------|-------|-------|-------|-------|
| r-1, c-2, t-4-trifluoro        | 3 | 10 | chair | eq, ax, eq     | -532.7219 | -532.2332 | 1.251 | 1.305 | 0.12  | 1.333 |
|                                | 3 | 23 | boat  |                | -532.7108 | -532.2222 | 8.189 | 8.241 |       | 8.271 |
|                                | 3 | 25 | boat  |                | -532.7159 | -532.2272 | 4.964 | 5.076 |       | 5.046 |
|                                | 3 | 31 | boat  |                | -532.7115 | -532.2227 | 7.784 | 7.892 |       | 7.866 |
|                                | 3 | 32 | boat  |                | -532.7103 | -532.2217 | 8.535 | 8.537 |       | 8.617 |
|                                | 3 | 42 | boat  |                | -532.7159 | -532.2272 | 4.964 | 5.076 |       | 5.046 |
|                                | 3 | 45 | boat  |                | -532.7136 | -532.2248 | 6.466 | 6.583 |       | 6.548 |
| r-1, c-2, c-4-trifluoro        | 3 | 8  | chair | ax, eq, eq     | -532.7215 | -532.2327 | 0.000 | 0.000 | 1.00  | 1.562 |
|                                | 3 | 9  | chair | eq, ax, ax     | -532.7194 | -532.2308 | 1.306 | 1.239 | 0.11  | 2.868 |
|                                | 3 | 24 | boat  |                | -532.7127 | -532.2238 | 5.520 | 5.600 |       | 7.081 |
|                                | 3 | 30 | boat  |                | -532.7127 | -532.2238 | 5.520 | 5.600 |       | 7.081 |
|                                | 3 | 33 | boat  |                | -532.7095 | -532.2206 | 7.515 | 7.602 |       | 9.077 |
|                                | 3 | 41 | boat  |                | -532.7112 | -532.2224 | 6.438 | 6.472 |       | 8.000 |
|                                | 3 | 46 | boat  |                | -532.7127 | -532.2238 | 5.520 | 5.600 |       | 7.081 |
| r-1, c-3, c-5-trifluoro        | 3 | 1  | chair | triaxial       | -532.7160 | -532.2274 | 3.451 | 3.240 | 0.003 | 5.010 |
|                                | 3 | 4  | chair | triequatorial  | -532.7215 | -532.2325 | 0.000 | 0.000 | 1.00  | 1.559 |
|                                | 3 | 48 | boat  |                | -532.7132 | -532.2245 | 5.199 | 5.016 |       | 6.758 |
| r-1, c-3, t-5-trifluoro        | 3 | 2  | chair | ax, ax, eq     | -532.7221 | -532.2336 | 1.210 | 1.157 | 0.13  | 1.210 |
|                                | 3 | 3  | chair | eq, eq, ax     | -532.7240 | -532.2354 | 0.000 | 0.000 | 1.00  | 0.000 |
|                                | 3 | 49 | boat  |                | -532.7158 | -532.2275 | 5.132 | 4.999 |       | 5.132 |
|                                | 3 | 50 | boat  |                | -532.7167 | -532.2280 | 4.594 | 4.628 |       | 4.594 |
|                                | 3 | 51 | boat  |                | -532.7131 | -532.2245 | 6.864 | 6.879 |       | 6.864 |
| r-1, t-2, c-3, t-4-tetrafluoro | 4 | 20 | chair | all axial      | -631.8434 | -631.2667 | 1.124 | 0.869 | 0.15  | 4.599 |
|                                | 4 | 29 | chair | all equatorial | -631.8452 | -631.2681 | 0.000 | 0.000 | 1.00  | 3.474 |
|                                | 4 | 30 | boat  |                | -631.8385 | -631.2617 | 4.222 | 3.975 |       | 7.697 |
|                                | 4 | 37 | boat  |                | -631.8393 | -631.2629 | 3.679 | 3.236 |       | 7.153 |
|                                | 4 | 63 | boat  |                | -631.8372 | -631.2606 | 5.019 | 4.685 |       | 8.493 |
|                                | 4 | 66 | boat  |                | -631.8383 | -631.2617 | 4.336 | 4.014 |       | 7.810 |
| r-1, t-2, c-3, c-4-tetrafluoro | 4 | 21 | chair | ax, ax, ax, eq | -631.8440 | -631.2673 | 1.283 | 1.083 | 0.11  | 4.202 |
|                                | 4 | 26 | chair | eq, eq, eq, ax | -631.8461 | -631.2691 | 0.000 | 0.000 | 1.00  | 2.919 |
|                                | 4 | 31 | boat  |                | -631.8376 | -631.2611 | 5.303 | 5.024 |       | 8.222 |
|                                | 4 | 35 | boat  |                | -631.8387 | -631.2620 | 4.610 | 4.413 |       | 7.529 |
|                                | 4 | 65 | boat  |                | -631.8376 | -631.2611 | 5.303 | 5.024 |       | 8.222 |

|                                |   |    |                     |                         |           |           |       |       |      |       |
|--------------------------------|---|----|---------------------|-------------------------|-----------|-----------|-------|-------|------|-------|
| r-1, t-2, t-3, t-4-tetrafluoro | 4 | 22 | chair               | eq, eq, ax, eq          | -631.8446 | -631.2679 | 0.636 | 0.414 | 0.34 | 3.848 |
|                                | 4 | 28 | chair               | ax, ax, eq, ax          | -631.8456 | -631.2685 | 0.000 | 0.000 | 1.00 | 3.212 |
|                                | 4 | 32 | boat                |                         | -631.8375 | -631.2606 | 5.117 | 4.980 |      | 8.329 |
| r-1, c-2, t-3, t-4-tetrafluoro | 4 | 25 | chair               | ax, eq, eq, ax          | -631.8479 | -631.2710 | 0.000 | 0.000 | 1.00 | 1.762 |
|                                | 4 | 27 | chair               | eq, ax, ax, eq          | -631.8461 | -631.2693 | 1.151 | 1.069 | 0.14 | 2.913 |
|                                | 4 | 34 | boat                |                         | -631.8378 | -631.2611 | 6.350 | 6.271 |      | 8.112 |
|                                | 4 | 36 | boat                |                         | -631.8368 | -631.2602 | 6.981 | 6.833 |      | 8.743 |
| r-1, c-2, c-3, c-4-tetrafluoro | 4 | 24 | chair               | ring flip -> enantiomer | -631.8419 | -631.2649 | 0.000 | 0.000 |      | 5.533 |
|                                |   |    | no boats considered |                         |           |           |       |       |      |       |
| r-1, t-2, t-3, c-4-tetrafluoro | 4 | 23 | chair               | ring flip -> enantiomer | -631.8472 | -631.2704 | 0.000 | 0.000 |      | 2.212 |
|                                | 4 | 33 | boat                |                         | -631.8399 | -631.2635 | 4.614 | 4.331 |      | 6.826 |
|                                | 4 | 64 | boat                |                         | -631.8399 | -631.2635 | 4.614 | 4.331 |      | 6.826 |
| r-1, t-2, c-3, c-5-tetrafluoro | 4 | 8  | chair               | all axial               | -631.8424 | -631.2657 | 2.410 | 2.019 | 0.02 | 5.207 |
|                                | 4 | 19 | chair               | all equatorial          | -631.8463 | -631.2689 | 0.000 | 0.000 | 1.00 | 2.797 |
|                                | 4 | 38 | boat                |                         | -631.8404 | -631.2639 | 3.677 | 3.195 |      | 6.474 |
|                                | 4 | 52 | boat                |                         | -631.8395 | -631.2628 | 4.262 | 3.839 |      | 7.059 |
|                                | 4 | 62 | boat                |                         | -631.8391 | -631.2624 | 4.482 | 4.087 |      | 7.278 |
| r-1, t-2, c-3, t-5-tetrafluoro | 4 | 9  | chair               | ax, ax, ax, eq          | -631.8472 | -631.2706 | 1.053 | 0.929 | 0.17 | 2.211 |
|                                | 4 | 18 | chair               | eq, eq, eq, ax          | -631.8489 | -631.2721 | 0.000 | 0.000 | 1.00 | 1.159 |
|                                | 4 | 39 | boat                |                         | -631.8425 | -631.2662 | 4.019 | 3.672 |      | 5.178 |
|                                | 4 | 54 | boat                |                         | -631.8425 | -631.2662 | 4.019 | 3.672 |      | 5.178 |
|                                | 4 | 61 | boat                |                         | -631.8384 | -631.2617 | 6.567 | 6.522 |      | 7.726 |
| r-1, t-2, t-3, c-5-tetrafluoro | 4 | 10 | chair               | ax, ax, eq, ax          | -631.8482 | -631.2716 | 0.000 | 0.000 | 1.00 | 1.582 |
|                                | 4 | 15 | chair               | eq, eq, ax, eq          | -631.8481 | -631.2712 | 0.057 | 0.295 | 0.91 | 1.639 |
|                                | 4 | 40 | boat                |                         | -631.8394 | -631.2627 | 5.551 | 5.577 |      | 7.133 |
|                                | 4 | 42 | boat                |                         | -631.8372 | -631.2606 | 6.901 | 6.897 |      | 8.483 |
|                                | 4 | 53 | boat                |                         | -631.8400 | -631.2632 | 5.189 | 5.263 |      | 6.771 |
|                                | 4 | 56 | boat                |                         | -631.8384 | -631.2619 | 6.156 | 6.138 |      | 7.738 |
|                                | 4 | 60 | boat                |                         | -631.8433 | -631.2668 | 3.108 | 3.038 |      | 4.690 |
|                                | 4 | 11 | chair               | ax, ax, eq, eq          | -631.8488 | -631.2721 | 0.000 | 0.000 | 1.00 | 1.212 |

|                                |   |    |                     |                   |           |           |       |       |       |       |
|--------------------------------|---|----|---------------------|-------------------|-----------|-----------|-------|-------|-------|-------|
| r-1, t-2, t-3, t-5-tetrafluoro | 4 | 14 | chair               | eq, eq, ax, ax    | -631.8462 | -631.2695 | 1.611 | 1.622 | 0.07  | 2.822 |
|                                | 4 | 41 | boat                |                   | -631.8392 | -631.2626 | 6.053 | 5.921 |       | 7.264 |
|                                | 4 | 43 | boat                |                   | -631.8388 | -631.2623 | 6.282 | 6.118 |       | 7.493 |
|                                | 4 | 55 | boat                |                   | -631.8388 | -631.2623 | 6.282 | 6.118 |       | 7.493 |
|                                | 4 | 58 | boat                |                   | -631.8415 | -631.2649 | 4.599 | 4.481 |       | 5.810 |
| r-1, c-2, c-3, c-5-tetrafluoro | 4 | 12 | chair               | ax, eq, ax, ax    | -631.8396 | -631.2628 | 4.172 | 3.853 | 0.001 | 7.017 |
|                                | 4 | 17 | chair               | eq, ax, eq, eq    | -631.8462 | -631.2689 | 0.000 | 0.000 | 1.00  | 2.845 |
|                                |   |    | no boats considered |                   |           |           |       |       |       |       |
| r-1, c-2, c-3, t-5-tetrafluoro | 4 | 13 | chair               | ax, eq, ax, eq    | -631.8450 | -631.2682 | 3.182 | 3.171 | 0.005 | 3.636 |
|                                | 4 | 16 | chair               | eq, ax, eq, ax    | -631.8500 | -631.2732 | 0.000 | 0.000 | 1.00  | 0.454 |
|                                | 4 | 57 | boat                |                   | -631.8370 | -631.2602 | 8.142 | 8.202 |       | 8.596 |
|                                | 4 | 59 | boat                |                   | -631.8383 | -631.2617 | 7.334 | 7.244 |       | 7.788 |
| r-1, t-2, t-4, c-5-tetrafluoro | 4 | 1  | chair               | all axial         | -631.8470 | -631.2703 | 0.558 | 0.195 | 0.39  | 2.361 |
|                                | 4 | 7  | chair               | all equatorial    | -631.8479 | -631.2706 | 0.000 | 0.000 | 1.00  | 1.803 |
|                                | 4 | 44 | boat                |                   | -631.8415 | -631.2649 | 4.023 | 3.612 |       | 5.826 |
|                                | 4 | 67 | boat                |                   | -631.8417 | -631.2651 | 3.862 | 3.476 |       | 5.665 |
| r-1, t-2, t-4, t-5-tetrafluoro | 4 | 2  | chair               | ax, ax, ax, eq    | -631.8484 | -631.2717 | 0.146 | 0.000 | 0.78  | 1.481 |
|                                | 4 | 6  | chair               | eq, eq, eq, ax    | -631.8486 | -631.2717 | 0.000 | 0.038 | 1.00  | 1.335 |
|                                | 4 | 45 | boat                |                   | -631.8389 | -631.2621 | 6.124 | 6.071 |       | 7.459 |
|                                | 4 | 47 | boat                |                   | -631.8383 | -631.2618 | 6.490 | 6.219 |       | 7.825 |
|                                | 4 | 50 | boat                |                   | -631.8380 | -631.2611 | 6.691 | 6.702 |       | 8.025 |
|                                | 4 | 68 | boat                |                   | -631.8401 | -631.2631 | 5.329 | 5.387 |       | 6.664 |
|                                | 4 | 69 | boat                |                   | -631.8406 | -631.2638 | 5.036 | 4.964 |       | 6.371 |
| r-1, t-2, c-4, t-5-tetrafluoro | 4 | 3  | chair               | ring flip -> self | -631.8507 | -631.2741 | 0.000 | 0.000 |       | 0.000 |
|                                | 4 | 46 | boat                |                   | -631.8407 | -631.2642 | 6.330 | 6.208 |       | 6.330 |
|                                | 4 | 51 | boat                |                   | -631.8418 | -631.2654 | 5.613 | 5.443 |       | 5.613 |
|                                | 4 | 72 | boat                |                   | -631.8379 | -631.2608 | 8.033 | 8.311 |       | 8.033 |
|                                | 4 | 73 | boat                |                   | -631.8370 | -631.2597 | 8.623 | 9.010 |       | 8.623 |
| r-1, c-2, t-4, t-5-tetrafluoro | 4 | 4  | chair               | ring flip -> self | -631.8503 | -631.2735 | 0.000 | 0.000 |       | 0.296 |
|                                | 4 | 48 | boat                |                   | -631.8436 | -631.2668 | 4.184 | 4.244 |       | 4.480 |
|                                | 4 | 71 | boat                |                   | -631.8436 | -631.2668 | 4.184 | 4.244 |       | 4.480 |

|                                     |   |    |       |                    |           |           |       |       |       |       |
|-------------------------------------|---|----|-------|--------------------|-----------|-----------|-------|-------|-------|-------|
| r-1, c-2, c-4, c-5-tetrafluoro      | 4 | 5  | chair | ring flip -> self  | -631.8453 | -631.2684 | 0.000 | 0.000 |       | 3.429 |
|                                     | 4 | 49 | boat  |                    | -631.8380 | -631.2608 | 4.555 | 4.720 |       | 7.984 |
|                                     | 4 | 70 | boat  |                    | -631.8380 | -631.2608 | 4.555 | 4.720 |       | 7.984 |
| r-1, t-2, c-3, t-4, c-5-pentafluoro | 5 | 1  | chair | all axial          | -730.9648 | -730.2999 | 2.922 | 2.295 | 0.01  | 4.981 |
|                                     | 5 | 20 | chair | all equatorial     | -730.9695 | -730.3035 | 0.000 | 0.000 | 1.00  | 2.059 |
|                                     | 5 | 21 | boat  |                    | -730.9644 | -730.2996 | 3.151 | 2.491 |       | 5.209 |
| r-1, t-2, c-3, t-4, t-5-pentafluoro | 5 | 2  | chair | ax, ax, ax, ax, eq | -730.9690 | -730.3042 | 1.457 | 1.107 | 0.09  | 2.316 |
|                                     | 5 | 14 | chair | eq, eq, eq, eq, ax | -730.9714 | -730.3059 | 0.000 | 0.000 | 1.00  | 0.859 |
|                                     | 5 | 22 | boat  |                    | -730.9650 | -730.3003 | 3.984 | 3.507 |       | 4.842 |
|                                     | 5 | 32 | boat  |                    | -730.9595 | -730.2946 | 7.459 | 7.130 |       | 8.317 |
|                                     | 5 | 33 | boat  |                    | -730.9612 | -730.2960 | 6.403 | 6.245 |       | 7.261 |
| r-1, t-2, c-3, c-4, c-5-pentafluoro | 5 | 3  | chair | ax, ax, ax, eq, ax | -730.9647 | -730.2997 | 3.277 | 2.771 | 0.004 | 5.052 |
|                                     | 5 | 18 | chair | eq, eq, eq, ax, eq | -730.9699 | -730.3042 | 0.000 | 0.000 | 1.00  | 1.774 |
|                                     | 5 | 23 | boat  |                    | -730.9588 | -730.2937 | 6.983 | 6.532 |       | 8.757 |
|                                     | 5 | 38 | boat  |                    | -730.9602 | -730.2950 | 6.105 | 5.740 |       | 7.879 |
| r-1, t-2, c-3, c-4, t-5-pentafluoro | 5 | 4  | chair | ax, ax, ax, eq, eq | -730.9701 | -730.3051 | 1.601 | 1.486 | 0.07  | 1.670 |
|                                     | 5 | 8  | chair | eq, eq, eq, ax, ax | -730.9726 | -730.3074 | 0.000 | 0.000 | 1.00  | 0.069 |
|                                     | 5 | 24 | boat  |                    | -730.9643 | -730.2998 | 5.230 | 4.806 |       | 5.299 |
|                                     | 5 | 27 | boat  |                    | -730.9666 | -730.3020 | 3.768 | 3.393 |       | 3.838 |
| r-1, t-2, t-3, t-4, c-5-pentafluoro | 5 | 5  | chair | ax, ax, eq, ax, ax | -730.9690 | -730.3041 | 1.198 | 0.720 | 0.13  | 2.337 |
|                                     | 5 | 19 | chair | eq, eq, ax, eq, eq | -730.9709 | -730.3053 | 0.000 | 0.000 | 1.00  | 1.138 |
|                                     | 5 | 25 | boat  |                    | -730.9642 | -730.2993 | 4.229 | 3.731 |       | 5.367 |
|                                     | 5 | 37 | boat  |                    | -730.9609 | -730.2960 | 6.303 | 5.789 |       | 7.441 |
| r-1, t-2, t-3, t-4, t-5-pentafluoro | 5 | 6  | chair | ax, ax, eq, ax, eq | -730.9696 | -730.3045 | 0.000 | 0.000 | 1.00  | 1.950 |
|                                     | 5 | 11 | chair | eq, eq, ax, eq, ax | -730.9676 | -730.3022 | 1.266 | 1.427 | 0.12  | 3.216 |
|                                     | 5 | 26 | boat  |                    | -730.9592 | -730.2942 | 6.570 | 6.464 |       | 8.520 |
|                                     | 5 | 36 | boat  |                    | -730.9586 | -730.2931 | 6.948 | 7.155 |       | 8.897 |
| r-1, t-2, t-3, c-4, c-5-pentafluoro | 5 | 7  | chair | ax, ax, eq, eq, ax | -730.9710 | -730.3059 | 0.359 | 0.250 | 0.55  | 1.077 |
|                                     | 5 | 16 | chair | eq, eq, ax, ax, eq | -730.9716 | -730.3063 | 0.000 | 0.000 | 1.00  | 0.718 |

|                                         |   |    |                     |                        |           |           |       |       |        |       |
|-----------------------------------------|---|----|---------------------|------------------------|-----------|-----------|-------|-------|--------|-------|
| c-5-pentafluoro                         | 5 | 29 | boat                |                        | -730.9642 | -730.2995 | 4.629 | 4.295 |        | 5.347 |
|                                         | 5 | 35 | boat                |                        | -730.9625 | -730.2976 | 5.711 | 5.472 |        | 6.429 |
| r-1, c-2, c-3, t-4, t-5-pentafluoro     | 5 | 9  | chair               | ax, eq, ax, ax, eq     | -730.9698 | -730.3047 | 1.858 | 1.617 | 0.04   | 1.858 |
|                                         | 5 | 12 | chair               | eq, ax, eq, eq, ax     | -730.9727 | -730.3073 | 0.000 | 0.000 | 1.00   | 0.000 |
|                                         | 5 | 28 | boat                |                        | -730.9637 | -730.2988 | 5.661 | 5.308 |        | 5.661 |
|                                         | 5 | 30 | boat                |                        | -730.9598 | -730.2949 | 8.093 | 7.806 |        | 8.093 |
|                                         | 5 | 34 | boat                |                        | -730.9599 | -730.2949 | 8.026 | 7.802 |        | 8.026 |
| r-1, c-2, c-3, c-4, c-5-pentafluoro     | 5 | 10 | chair               | ax, eq, ax, eq, ax     | -730.9612 | -730.2959 | 2.669 | 2.396 | 0.01   | 7.229 |
|                                         | 5 | 17 | chair               | eq, ax, eq, ax, eq     | -730.9655 | -730.2997 | 0.000 | 0.000 | 1.00   | 4.561 |
|                                         |   |    | no boats considered |                        |           |           |       |       |        |       |
| r-1, c-2, t-3, c-4, c-5-pentafluoro     | 5 | 13 | chair               | ax, eq, eq, eq, ax     | -730.9683 | -730.3029 | 0.092 | 0.318 | 0.86   | 2.768 |
|                                         | 5 | 15 | chair               | eq, ax, ax, ax, eq     | -730.9685 | -730.3034 | 0.000 | 0.000 | 1.00   | 2.676 |
|                                         | 5 | 31 | boat                |                        | -730.9629 | -730.2979 | 3.478 | 3.466 |        | 6.154 |
| r-1, t-2, c-3, t-4, c-5, t-6-hexafluoro | 6 | 1  | chair               | all axial              | -830.0830 | -829.3297 | 4.680 | 3.624 | 0.0004 | 6.975 |
|                                         | 6 | 12 | chair               | all equatorial         | -830.0904 | -829.3354 | 0.000 | 0.000 | 1.00   | 2.295 |
|                                         | 6 | 13 | boat                |                        | -830.0864 | -829.3332 | 2.520 | 1.371 |        | 4.815 |
| r-1, t-2, c-3, t-4, c-5, c-6-hexafluoro | 6 | 2  | chair               | ax, ax, ax, ax, ax, eq | -830.0860 | -829.3327 | 3.770 | 3.090 | 0.002  | 5.079 |
|                                         | 6 | 11 | chair               | eq, eq, eq, eq, eq, ax | -830.0920 | -829.3376 | 0.000 | 0.000 | 1.00   | 1.309 |
|                                         | 6 | 14 | boat                |                        | -830.0833 | -829.3297 | 5.428 | 4.937 |        | 6.737 |
|                                         | 6 | 15 | boat                |                        | -830.0802 | -829.3267 | 7.421 | 6.840 |        | 8.730 |
|                                         | 6 | 17 | boat                |                        | -830.0829 | -829.3296 | 5.722 | 5.054 |        | 7.031 |
| r-1, t-2, c-3, t-4, t-5, c-6-hexafluoro | 6 | 20 | boat                |                        | -830.0835 | -829.3300 | 5.344 | 4.800 |        | 6.653 |
|                                         | 6 | 3  | chair               | ax, ax, ax, ax, eq, eq | -830.0905 | -829.3370 | 2.001 | 1.732 | 0.03   | 2.248 |
|                                         | 6 | 8  | chair               | eq, eq, eq, eq, ax, ax | -830.0937 | -829.3398 | 0.000 | 0.000 | 1.00   | 0.247 |
|                                         | 6 | 16 | boat                |                        | -830.0854 | -829.3320 | 5.206 | 4.874 |        | 5.453 |
|                                         | 6 | 18 | boat                |                        | -830.0853 | -829.3324 | 5.273 | 4.675 |        | 5.520 |
| r-1, t-2, c-3, c-4, c-5, c-6-hexafluoro | 6 | 22 | boat                |                        | -830.0792 | -829.3250 | 9.098 | 9.298 |        | 9.345 |
|                                         | 6 | 4  | chair               | ax, ax, ax, eq, ax, eq | -830.0850 | -829.3314 | 1.662 | 1.129 | 0.06   | 5.686 |
|                                         | 6 | 9  | chair               | eq, eq, eq, ax, eq, ax | -830.0877 | -829.3332 | 0.000 | 0.000 | 1.00   | 4.024 |
|                                         |   |    | no boats considered |                        |           |           |       |       |        |       |



1\_1

|   |           |           |           |
|---|-----------|-----------|-----------|
| C | -0.285995 | -0.623242 | 1.265580  |
| C | 0.350280  | -1.183774 | 0.000000  |
| C | -0.285995 | -0.623242 | -1.265580 |
| C | -0.285995 | 0.910331  | -1.260600 |
| C | -0.972961 | 1.449936  | 0.000000  |
| C | -0.285995 | 0.910331  | 1.260600  |
| H | 0.247275  | -1.015268 | -2.142059 |
| H | 0.315022  | -2.282975 | 0.000000  |
| H | -1.320666 | -0.995307 | 1.312494  |
| H | 0.247275  | -1.015268 | 2.142059  |
| H | 0.752839  | 1.267749  | -1.288409 |
| H | -0.785243 | 1.285450  | -2.164657 |
| H | -0.963263 | 2.548916  | 0.000000  |
| H | -2.028587 | 1.134472  | 0.000000  |
| H | 0.752839  | 1.267749  | 1.288409  |
| H | -0.785243 | 1.285450  | 2.164657  |
| H | -1.320666 | -0.995307 | -1.312494 |
| F | 1.720931  | -0.836411 | 0.000000  |

1\_2

|   |           |           |           |
|---|-----------|-----------|-----------|
| C | -0.582796 | 0.896662  | 0.000000  |
| C | 0.094989  | 0.381626  | 1.259630  |
| C | 0.094989  | -1.153721 | 1.263086  |
| C | 0.769434  | -1.703373 | 0.000000  |
| C | 0.094989  | -1.153721 | -1.263086 |
| C | 0.094989  | 0.381626  | -1.259630 |
| H | 0.600745  | -1.526442 | 2.164138  |
| H | 1.128788  | 0.756293  | 1.274509  |
| H | -0.419442 | 0.779946  | 2.144424  |
| H | -1.642676 | 0.597651  | 0.000000  |
| H | 1.830015  | -1.408285 | 0.000000  |
| H | 0.736678  | -2.801861 | 0.000000  |
| H | 0.600745  | -1.526442 | -2.164138 |
| H | -0.943410 | -1.517433 | -1.304016 |
| H | 1.128788  | 0.756293  | -1.274509 |
| H | -0.419442 | 0.779946  | -2.144424 |
| H | -0.943410 | -1.517433 | 1.304016  |
| F | -0.561884 | 2.303686  | 0.000000  |

1\_3

|   |           |           |           |
|---|-----------|-----------|-----------|
| C | -1.159864 | 0.194262  | 0.317609  |
| C | -0.263510 | 1.436597  | 0.297543  |
| C | 1.231451  | 1.081310  | 0.188448  |
| C | 1.417748  | -0.174631 | -0.669817 |
| C | 0.779967  | -1.398878 | 0.021637  |
| C | -0.435252 | -1.011289 | 0.892397  |
| H | 1.787494  | 1.930788  | -0.230194 |
| H | -0.577070 | 2.051560  | -0.556208 |
| H | -0.451102 | 2.024622  | 1.206627  |
| H | -0.109996 | -0.737114 | 1.906513  |
| H | 0.938783  | -0.009050 | -1.643734 |
| H | 2.483737  | -0.361313 | -0.856540 |
| H | 1.523836  | -1.897052 | 0.658462  |
| H | 0.469913  | -2.128193 | -0.736500 |
| H | -1.126841 | -1.857803 | 0.991575  |
| H | 1.645754  | 0.893078  | 1.190266  |

|   |           |           |           |
|---|-----------|-----------|-----------|
| H | -2.095003 | 0.397725  | 0.857695  |
| F | -1.545860 | -0.119053 | -1.008319 |

1\_4

|   |           |           |           |
|---|-----------|-----------|-----------|
| C | -0.970341 | -0.067501 | -0.339774 |
| C | -0.399677 | 1.304269  | 0.030407  |
| C | 1.102331  | 1.212534  | 0.377292  |
| C | 1.770800  | 0.087387  | -0.421233 |
| C | 1.185453  | -1.285745 | -0.017762 |
| C | -0.285469 | -1.174034 | 0.441629  |
| H | 1.592853  | 2.175633  | 0.183920  |
| H | -0.565187 | 2.006966  | -0.796747 |
| H | -0.970773 | 1.673837  | 0.892369  |
| H | -0.343019 | -0.930999 | 1.511675  |
| H | -0.865382 | -0.260984 | -1.417373 |
| H | 1.607148  | 0.267063  | -1.493860 |
| H | 2.857532  | 0.090597  | -0.264089 |
| H | 1.781585  | -1.721232 | 0.794874  |
| H | 1.255488  | -1.978099 | -0.867614 |
| H | -0.816816 | -2.122033 | 0.290224  |
| H | 1.225394  | 1.004011  | 1.449581  |
| F | -2.353045 | -0.074025 | -0.078479 |

1\_5

|   |           |           |           |
|---|-----------|-----------|-----------|
| C | 0.338629  | -1.103974 | 0.635969  |
| C | 1.090027  | 0.210359  | 0.408676  |
| C | 0.201419  | 1.283385  | -0.222537 |
| C | -1.237791 | 1.130104  | 0.283148  |
| C | -1.848752 | -0.196639 | -0.222978 |
| C | -0.769514 | -1.286549 | -0.403268 |
| H | 0.604215  | 2.282622  | -0.013311 |
| H | -0.325411 | -1.219686 | -1.405974 |
| H | -0.102541 | -1.091635 | 1.643145  |
| H | -1.234876 | 1.150023  | 1.382874  |
| H | -1.851134 | 1.980503  | -0.041857 |
| H | -2.362248 | -0.027305 | -1.179357 |
| H | -2.610937 | -0.542763 | 0.488848  |
| H | -1.217172 | -2.285929 | -0.323074 |
| H | 1.067329  | -1.924488 | 0.609271  |
| H | 0.225543  | 1.141139  | -1.311579 |
| H | 1.522361  | 0.566370  | 1.354693  |
| F | 2.182306  | -0.027663 | -0.453082 |

2\_1

|   |           |           |           |
|---|-----------|-----------|-----------|
| C | -0.227575 | 1.450302  | 0.000000  |
| C | 0.227575  | 0.732181  | 1.262992  |
| C | -0.227575 | -0.732181 | 1.262992  |
| C | 0.227575  | -1.450302 | 0.000000  |
| C | -0.227575 | -0.732181 | -1.262992 |
| C | 0.227575  | 0.732181  | -1.262992 |
| H | 0.164934  | -1.256287 | 2.143703  |
| H | 1.323957  | 0.779399  | 1.304068  |
| H | -0.164934 | 1.256287  | 2.143703  |
| H | 0.110852  | 2.495950  | 0.000000  |
| H | -0.110852 | -2.495950 | 0.000000  |
| H | 0.164934  | -1.256287 | -2.143703 |
| H | -1.323957 | -0.779399 | -1.304068 |
| H | 1.323957  | 0.779399  | -1.304068 |

|   |           |           |           |
|---|-----------|-----------|-----------|
| H | -0.164934 | 1.256287  | -2.143703 |
| H | -1.323957 | -0.779399 | 1.304068  |
| F | -1.642103 | 1.495305  | 0.000000  |
| F | 1.642103  | -1.495305 | 0.000000  |

2\_2

|   |           |           |           |
|---|-----------|-----------|-----------|
| C | 0.473205  | -1.539876 | 0.000000  |
| C | -0.164811 | -0.979301 | 1.264791  |
| C | -0.164811 | 0.555320  | 1.257095  |
| C | -0.851804 | 1.064983  | 0.000000  |
| C | -0.164811 | 0.555320  | -1.257095 |
| C | -0.164811 | -0.979301 | -1.264791 |
| H | -0.676349 | 0.945803  | 2.146104  |
| H | -1.196613 | -1.357595 | 1.316639  |
| H | 0.370568  | -1.361502 | 2.143035  |
| H | 0.434153  | -2.638394 | 0.000000  |
| H | -1.909261 | 0.755337  | 0.000000  |
| H | -0.676349 | 0.945803  | -2.146104 |
| H | 0.867650  | 0.927709  | -1.267566 |
| H | -1.196613 | -1.357595 | -1.316639 |
| H | 0.370568  | -1.361502 | -2.143035 |
| H | 0.867650  | 0.927709  | 1.267566  |
| F | -0.843913 | 2.469610  | 0.000000  |
| F | 1.840764  | -1.190569 | 0.000000  |

2\_3

|   |           |           |           |
|---|-----------|-----------|-----------|
| C | -0.236350 | 1.435402  | 0.000000  |
| C | 0.241781  | 0.728290  | 1.259873  |
| C | -0.241781 | -0.728290 | 1.259873  |
| C | 0.236350  | -1.435402 | 0.000000  |
| C | -0.241781 | -0.728290 | -1.259873 |
| C | 0.241781  | 0.728290  | -1.259873 |
| H | 0.124626  | -1.260051 | 2.146954  |
| H | 1.340543  | 0.764576  | 1.279815  |
| H | -0.124626 | 1.260051  | 2.146954  |
| H | -1.335636 | 1.495270  | 0.000000  |
| H | 1.335636  | -1.495270 | 0.000000  |
| H | 0.124626  | -1.260051 | -2.146954 |
| H | -1.340543 | -0.764576 | -1.279815 |
| H | 1.340543  | 0.764576  | -1.279815 |
| H | -0.124626 | 1.260051  | -2.146954 |
| H | -1.340543 | -0.764576 | 1.279815  |
| F | 0.241781  | 2.756055  | 0.000000  |
| F | -0.241781 | -2.756055 | 0.000000  |

2\_4

|   |           |           |           |
|---|-----------|-----------|-----------|
| C | -1.279901 | -0.396414 | 0.408891  |
| C | 0.000000  | -0.921595 | 1.052575  |
| C | 1.279901  | -0.396414 | 0.408891  |
| C | 1.256817  | 1.114152  | 0.212336  |
| C | 0.000000  | 1.553620  | -0.545534 |
| C | -1.256817 | 1.114152  | 0.212336  |
| H | 2.146515  | -0.693871 | 1.017144  |
| H | 0.000000  | -0.606026 | 2.106125  |
| H | 0.000000  | -2.018643 | 1.031540  |
| H | -2.146515 | -0.693871 | 1.017144  |

|   |           |           |           |
|---|-----------|-----------|-----------|
| H | 1.276023  | 1.585091  | 1.207184  |
| H | 2.168702  | 1.418585  | -0.317629 |
| H | 0.000000  | 2.643295  | -0.679128 |
| H | 0.000000  | 1.096919  | -1.543294 |
| H | -1.276023 | 1.585091  | 1.207184  |
| H | -2.168702 | 1.418585  | -0.317629 |
| F | -1.454107 | -1.007786 | -0.845868 |
| F | 1.454107  | -1.007786 | -0.845868 |

### 2\_5

|   |           |           |           |
|---|-----------|-----------|-----------|
| C | -1.197333 | -0.744272 | 0.406546  |
| C | 0.279494  | -1.068441 | 0.600455  |
| C | 1.149348  | -0.188559 | -0.286839 |
| C | 0.888960  | 1.288758  | -0.042575 |
| C | -0.590976 | 1.600846  | -0.304738 |
| C | -1.493197 | 0.738810  | 0.586026  |
| H | 0.546152  | -0.883165 | 1.650427  |
| H | 0.462622  | -2.127742 | 0.381740  |
| H | -1.816496 | -1.351809 | 1.080880  |
| H | 1.143627  | 1.520201  | 1.002234  |
| H | 1.541014  | 1.890003  | -0.689402 |
| H | -0.791553 | 2.664802  | -0.124536 |
| H | -0.828498 | 1.399087  | -1.358264 |
| H | -1.324205 | 0.990021  | 1.643704  |
| H | -2.552756 | 0.921269  | 0.364511  |
| H | 0.972486  | -0.431061 | -1.343469 |
| F | -1.562217 | -1.114841 | -0.907617 |
| F | 2.498865  | -0.480099 | -0.021392 |

### 2\_6

|   |           |           |           |
|---|-----------|-----------|-----------|
| C | -0.169752 | -0.441752 | 1.244849  |
| C | 0.516758  | -0.988107 | 0.000000  |
| C | -0.169752 | -0.441752 | -1.244849 |
| C | -0.169752 | 1.078467  | -1.265910 |
| C | -0.851452 | 1.616413  | 0.000000  |
| C | -0.169752 | 1.078467  | 1.265910  |
| H | 1.567713  | -0.668992 | 0.000000  |
| H | 0.486380  | -2.084847 | 0.000000  |
| H | -1.205091 | -0.812885 | 1.295486  |
| H | 0.872431  | 1.425583  | -1.308595 |
| H | -0.682271 | 1.433797  | -2.169211 |
| H | -0.830450 | 2.713385  | 0.000000  |
| H | -1.910951 | 1.318234  | 0.000000  |
| H | 0.872431  | 1.425583  | 1.308595  |
| H | -0.682271 | 1.433797  | 2.169211  |
| H | -1.205091 | -0.812885 | -1.295486 |
| F | 0.488855  | -0.932288 | 2.382862  |
| F | 0.488855  | -0.932288 | -2.382862 |

### 2\_7

|   |           |           |           |
|---|-----------|-----------|-----------|
| C | -0.727271 | -0.919602 | 0.234820  |
| C | 0.727271  | -0.919602 | -0.234820 |
| C | 1.087157  | 0.344469  | -0.997886 |
| C | 0.742185  | 1.603094  | -0.192495 |
| C | -0.742185 | 1.603094  | 0.192495  |
| C | -1.087157 | 0.344469  | 0.997886  |
| H | 2.154550  | 0.312799  | -1.253253 |
| H | 0.921957  | -1.817995 | -0.835945 |

|   |           |           |           |
|---|-----------|-----------|-----------|
| H | -0.921957 | -1.817995 | 0.835945  |
| H | 1.356469  | 1.628345  | 0.718598  |
| H | 0.989113  | 2.498217  | -0.778801 |
| H | -0.989113 | 2.498217  | 0.778801  |
| H | -1.356469 | 1.628345  | -0.718598 |
| H | -0.516965 | 0.334273  | 1.937385  |
| H | -2.154550 | 0.312799  | 1.253253  |
| H | 0.516965  | 0.334273  | -1.937385 |
| F | 1.523494  | -1.013712 | 0.923247  |
| F | -1.523494 | -1.013712 | -0.923247 |

## 2\_8

|   |           |           |           |
|---|-----------|-----------|-----------|
| C | -0.398809 | -1.003780 | -0.330640 |
| C | -0.907113 | 0.421163  | -0.476088 |
| C | -0.138780 | 1.387514  | 0.409341  |
| C | 1.353305  | 1.331080  | 0.047448  |
| C | 1.895535  | -0.098348 | 0.173818  |
| C | 1.081681  | -1.074132 | -0.686742 |
| H | -0.541862 | 2.399246  | 0.274203  |
| H | -0.796548 | 0.707924  | -1.533237 |
| H | -1.005018 | -1.684343 | -0.944280 |
| H | 1.489203  | 1.679957  | -0.988214 |
| H | 1.920526  | 2.014037  | 0.693459  |
| H | 2.951300  | -0.133370 | -0.126251 |
| H | 1.840936  | -0.417454 | 1.223400  |
| H | 1.194324  | -0.821921 | -1.751580 |
| H | 1.432592  | -2.105343 | -0.552300 |
| H | -0.287717 | 1.096648  | 1.457020  |
| F | -0.560935 | -1.411571 | 1.003978  |
| F | -2.273805 | 0.465308  | -0.178983 |

## 2\_9

|   |           |           |           |
|---|-----------|-----------|-----------|
| C | -0.453480 | 0.607808  | -0.649581 |
| C | 0.453480  | -0.607808 | -0.649581 |
| C | 1.319411  | -0.646930 | 0.602361  |
| C | 0.453480  | -0.617830 | 1.867327  |
| C | -0.453480 | 0.617830  | 1.867327  |
| C | -1.319411 | 0.646930  | 0.602361  |
| H | 1.950605  | -1.544100 | 0.568941  |
| H | -0.166138 | -1.512879 | -0.730787 |
| H | 0.166138  | 1.512879  | -0.730787 |
| H | -0.169278 | -1.524268 | 1.908756  |
| H | 1.095973  | -0.625271 | 2.757628  |
| H | -1.095973 | 0.625271  | 2.757628  |
| H | 0.169278  | 1.524268  | 1.908756  |
| H | -1.986208 | -0.227277 | 0.587368  |
| H | -1.950605 | 1.544100  | 0.568941  |
| H | 1.986208  | 0.227277  | 0.587368  |
| F | -1.280529 | 0.569816  | -1.779172 |
| F | 1.280529  | -0.569816 | -1.779172 |

## 2\_10

|   |           |           |           |
|---|-----------|-----------|-----------|
| C | -0.298451 | -1.053430 | 0.121379  |
| C | -1.109609 | 0.175723  | -0.313747 |
| C | -0.328413 | 1.476958  | -0.177082 |
| C | 1.130899  | 1.228998  | -0.579302 |
| C | 1.818499  | 0.285846  | 0.432472  |
| C | 0.817699  | -0.693154 | 1.082147  |
| H | -0.793354 | 2.259224  | -0.789880 |

|   |           |           |           |
|---|-----------|-----------|-----------|
| H | -1.427918 | 0.012994  | -1.352026 |
| H | 0.342642  | -0.236601 | 1.962094  |
| H | 1.152986  | 0.777985  | -1.580555 |
| H | 1.673953  | 2.180109  | -0.642397 |
| H | 2.300129  | 0.875321  | 1.223949  |
| H | 2.610299  | -0.278987 | -0.073904 |
| H | 1.324542  | -1.603738 | 1.425383  |
| H | -0.988619 | -1.792868 | 0.548240  |
| H | -0.377688 | 1.802798  | 0.871124  |
| F | 0.266928  | -1.629332 | -1.034611 |
| F | -2.267008 | 0.238011  | 0.480474  |

### 2\_11

|   |           |           |           |
|---|-----------|-----------|-----------|
| C | -0.700547 | -0.644567 | -0.248882 |
| C | -0.690886 | 0.738903  | 0.389991  |
| C | 0.731292  | 1.226164  | 0.670495  |
| C | 1.712948  | 0.665248  | -0.361733 |
| C | 1.794886  | -0.873528 | -0.239898 |
| C | 0.462779  | -1.481959 | 0.254053  |
| H | 0.720962  | 2.323361  | 0.674369  |
| H | 0.427888  | -1.509442 | 1.351955  |
| H | 1.369995  | 0.950279  | -1.365878 |
| H | 2.707885  | 1.109063  | -0.230740 |
| H | 2.593980  | -1.151004 | 0.459582  |
| H | 2.060979  | -1.305337 | -1.213628 |
| H | 0.345436  | -2.512976 | -0.100465 |
| H | 1.027325  | 0.896884  | 1.676378  |
| H | -0.650362 | -0.529075 | -1.340328 |
| F | -1.916383 | -1.279926 | 0.039248  |
| F | -1.325205 | 1.639851  | -0.484105 |
| H | -1.292627 | 0.707358  | 1.308302  |

### 2\_12

|   |           |           |           |
|---|-----------|-----------|-----------|
| C | -1.131501 | -0.857177 | -0.305199 |
| C | 0.360775  | -1.192600 | -0.402596 |
| C | 1.235005  | 0.059496  | -0.328327 |
| C | 0.638310  | 1.087431  | 0.615538  |
| C | -0.688641 | 1.613674  | 0.025085  |
| C | -1.429239 | 0.545195  | -0.811165 |
| H | 0.622228  | -1.845755 | 0.439055  |
| H | 0.561744  | -1.743630 | -1.330161 |
| H | -1.109419 | 0.586954  | -1.862480 |
| H | 0.463167  | 0.607770  | 1.586291  |
| H | 1.350666  | 1.908148  | 0.764300  |
| H | -0.492154 | 2.485907  | -0.612057 |
| H | -1.333745 | 1.953575  | 0.842971  |
| H | -2.510852 | 0.727238  | -0.794334 |
| H | -1.732482 | -1.611348 | -0.830670 |
| H | 1.364803  | 0.505704  | -1.325745 |
| F | -1.529476 | -0.921646 | 1.049559  |
| F | 2.519230  | -0.312874 | 0.101865  |

### 2\_13

|   |           |           |           |
|---|-----------|-----------|-----------|
| C | 1.188690  | -0.566626 | 0.461644  |
| C | 0.000000  | -1.410793 | 0.000000  |
| C | -1.188690 | -0.566625 | -0.461644 |
| C | -0.744784 | 0.762240  | -1.048441 |

|   |           |           |           |
|---|-----------|-----------|-----------|
| C | 0.000001  | 1.616349  | 0.000000  |
| C | 0.744784  | 0.762239  | 1.048441  |
| H | 0.336791  | -2.057747 | -0.819853 |
| H | -0.336792 | -2.057746 | 0.819854  |
| H | 0.081330  | 0.536453  | 1.893399  |
| H | -0.081330 | 0.536454  | -1.893399 |
| H | -1.614546 | 1.304719  | -1.439312 |
| H | -0.713384 | 2.267465  | 0.518565  |
| H | 0.713386  | 2.267464  | -0.518564 |
| H | 1.614546  | 1.304718  | 1.439313  |
| H | 1.812564  | -1.132520 | 1.166425  |
| F | 2.015231  | -0.300969 | -0.657420 |
| H | -1.812564 | -1.132519 | -1.166426 |
| F | -2.015231 | -0.300969 | 0.657419  |

#### 2\_14

|   |           |           |           |
|---|-----------|-----------|-----------|
| C | 0.741311  | -1.023889 | -0.299852 |
| C | 0.000000  | 0.000000  | -1.165813 |
| C | -0.741311 | 1.023889  | -0.299852 |
| C | 0.000000  | 1.284214  | 1.000440  |
| C | 0.000000  | 0.000000  | 1.861793  |
| C | 0.000000  | -1.284214 | 1.000440  |
| H | 0.703113  | 0.541272  | -1.810709 |
| H | -0.703113 | -0.541272 | -1.810709 |
| H | -1.025878 | -1.595092 | 0.759293  |
| H | 1.025878  | 1.595092  | 0.759293  |
| H | -0.474752 | 2.112846  | 1.539667  |
| H | -0.880715 | -0.007676 | 2.515944  |
| H | 0.880715  | 0.007676  | 2.515944  |
| H | 0.474752  | -2.112846 | 1.539667  |
| H | -1.762513 | 0.682369  | -0.078849 |
| H | 1.762513  | -0.682369 | -0.078849 |
| F | 0.876616  | -2.218983 | -1.024091 |
| F | -0.876616 | 2.218983  | -1.024091 |

#### 2\_15

|   |           |           |           |
|---|-----------|-----------|-----------|
| C | 1.581566  | 0.064673  | -0.153730 |
| C | 0.848198  | 1.405414  | -0.252523 |
| C | -0.676459 | 1.233639  | -0.403991 |
| C | -1.131107 | 0.001900  | 0.361075  |
| C | -0.557004 | -1.275593 | -0.257896 |
| C | 0.835291  | -1.039272 | -0.884365 |
| H | -1.205549 | 2.119922  | -0.033162 |
| H | 1.087337  | 1.977171  | 0.652930  |
| H | 1.245927  | 1.967837  | -1.107117 |
| H | 0.734925  | -0.723664 | -1.932403 |
| H | -0.839828 | 0.090680  | 1.415384  |
| H | -1.259403 | -1.607351 | -1.033205 |
| H | -0.506456 | -2.063396 | 0.501821  |
| H | 1.424120  | -1.964577 | -0.876745 |
| H | 2.615820  | 0.160491  | -0.510282 |
| H | -0.948729 | 1.103251  | -1.460872 |
| F | 1.674268  | -0.303962 | 1.209855  |
| F | -2.535498 | -0.074363 | 0.338171  |

#### 2\_16

|   |           |           |           |
|---|-----------|-----------|-----------|
| C | -1.415913 | -0.248727 | -0.127624 |
| C | -0.456480 | -1.431934 | -0.331221 |
| C | 0.931795  | -1.005428 | -0.836962 |
| C | 1.415913  | 0.248727  | -0.127624 |

|   |           |           |           |
|---|-----------|-----------|-----------|
| C | 0.456480  | 1.431934  | -0.331221 |
| C | -0.931795 | 1.005428  | -0.836962 |
| H | 1.655162  | -1.818257 | -0.693646 |
| H | -0.361404 | -1.941346 | 0.634362  |
| H | -0.898669 | -2.146303 | -1.037420 |
| H | -0.896716 | 0.784848  | -1.913749 |
| H | 0.898669  | 2.146303  | -1.037420 |
| H | 0.361404  | 1.941346  | 0.634362  |
| H | -1.655162 | 1.818257  | -0.693646 |
| H | -2.431968 | -0.513208 | -0.450217 |
| H | 0.896716  | -0.784848 | -1.913749 |
| F | -1.513324 | 0.042516  | 1.248390  |
| F | 1.513324  | -0.042516 | 1.248390  |
| H | 2.431968  | 0.513208  | -0.450217 |

### 2\_17

|   |           |           |           |
|---|-----------|-----------|-----------|
| C | -0.029061 | 1.370952  | -0.355535 |
| C | 1.319898  | 0.737341  | 0.008200  |
| C | 1.163738  | -0.738386 | 0.432447  |
| C | 0.029061  | -1.370952 | -0.355535 |
| C | -1.319898 | -0.737341 | 0.008200  |
| C | -1.163738 | 0.738386  | 0.432447  |
| H | 2.093836  | -1.293846 | 0.261715  |
| H | 2.007306  | 0.822588  | -0.842658 |
| H | 1.744729  | 1.322139  | 0.833402  |
| H | -0.925928 | 0.812210  | 1.502057  |
| H | -1.744729 | -1.322139 | 0.833402  |
| H | -2.007306 | -0.822588 | -0.842658 |
| H | -2.093836 | 1.293846  | 0.261715  |
| H | 0.925928  | -0.812210 | 1.502057  |
| H | 0.231726  | -1.275269 | -1.432593 |
| H | -0.231726 | 1.275269  | -1.432593 |
| F | 0.029061  | 2.749330  | -0.092510 |
| F | -0.029061 | -2.749330 | -0.092510 |

### 2\_18

|   |           |           |           |
|---|-----------|-----------|-----------|
| C | 0.595284  | 0.475813  | -0.918980 |
| C | 0.595284  | 1.392620  | 0.304199  |
| C | -0.090568 | 0.761196  | 1.532119  |
| C | 0.090568  | -0.761196 | 1.532119  |
| C | -0.595284 | -1.392620 | 0.304199  |
| C | -0.595284 | -0.475813 | -0.918980 |
| H | 0.322897  | 1.197052  | 2.450786  |
| H | 1.647209  | 1.620504  | 0.521623  |
| H | 0.105302  | 2.336996  | 0.037556  |
| H | 1.163638  | -0.992115 | 1.513865  |
| H | -0.322897 | -1.197052 | 2.450786  |
| H | -1.647209 | -1.620504 | 0.521623  |
| H | -0.105302 | -2.336996 | 0.037556  |
| H | -0.632288 | -1.055463 | -1.850325 |
| H | 0.632288  | 1.055463  | -1.850325 |
| H | -1.163638 | 0.992115  | 1.513865  |
| F | 1.744789  | -0.342538 | -0.908615 |
| F | -1.744789 | 0.342538  | -0.908615 |

### 2\_19

|   |           |           |           |
|---|-----------|-----------|-----------|
| C | -0.331481 | -1.051377 | -0.160457 |
| C | 1.145754  | -1.138812 | -0.554201 |
| C | 1.855413  | 0.230930  | -0.491009 |
| C | 1.235990  | 1.121025  | 0.595339  |

|   |           |           |           |
|---|-----------|-----------|-----------|
| C | -0.248394 | 1.420884  | 0.285979  |
| C | -0.879325 | 0.305877  | -0.547944 |
| H | 2.926267  | 0.081529  | -0.302762 |
| H | 1.616449  | -1.852613 | 0.133290  |
| H | 1.221148  | -1.561368 | -1.565009 |
| H | 1.309202  | 0.601715  | 1.558959  |
| H | 1.797530  | 2.059665  | 0.684296  |
| H | -0.355006 | 2.368980  | -0.256084 |
| H | -0.824556 | 1.503252  | 1.214649  |
| H | -0.927904 | -1.853370 | -0.614435 |
| H | 1.773801  | 0.740469  | -1.462320 |
| F | -0.453873 | -1.207916 | 1.233721  |
| H | -0.672908 | 0.445806  | -1.619240 |
| F | -2.271879 | 0.334003  | -0.404564 |

#### 2\_20

|   |           |           |           |
|---|-----------|-----------|-----------|
| C | 0.596017  | 0.467806  | -0.607597 |
| C | 0.544496  | 1.408928  | 0.602756  |
| C | -0.127307 | 0.755463  | 1.828222  |
| C | 0.127307  | -0.755463 | 1.828222  |
| C | -0.544496 | -1.408928 | 0.602756  |
| C | -0.596017 | -0.467806 | -0.607597 |
| H | 0.248776  | 1.219081  | 2.749033  |
| H | 1.564955  | 1.727905  | 0.848006  |
| H | -0.009934 | 2.303509  | 0.291990  |
| H | 1.211968  | -0.933017 | 1.802715  |
| H | -0.248776 | -1.219081 | 2.749033  |
| H | -1.564955 | -1.727905 | 0.848006  |
| H | 0.009934  | -2.303509 | 0.291990  |
| H | -1.211968 | 0.933017  | 1.802715  |
| H | 1.517235  | -0.131425 | -0.626774 |
| F | 0.596017  | 1.234771  | -1.778361 |
| H | -1.517235 | 0.131425  | -0.626774 |
| F | -0.596017 | -1.234771 | -1.778361 |

#### 2\_21

|   |           |           |           |
|---|-----------|-----------|-----------|
| C | -0.943793 | -0.982826 | 0.291353  |
| C | -1.797773 | 0.274510  | 0.100497  |
| C | -0.948207 | 1.559572  | 0.030799  |
| C | 0.432449  | 1.263234  | -0.567447 |
| C | 1.210842  | 0.372013  | 0.396264  |
| C | 0.328377  | -0.690037 | 1.070076  |
| H | -1.468993 | 2.323195  | -0.560108 |
| H | -2.372849 | 0.140180  | -0.824385 |
| H | -2.520393 | 0.340901  | 0.925070  |
| H | 0.030047  | -0.338669 | 2.067901  |
| H | 0.321406  | 0.727832  | -1.517729 |
| H | 0.993867  | 2.186366  | -0.758132 |
| H | 1.689347  | 0.985419  | 1.173248  |
| H | 0.919811  | -1.604054 | 1.201863  |
| H | -1.524752 | -1.777659 | 0.779332  |
| H | -0.817594 | 1.977700  | 1.040375  |
| F | -0.583427 | -1.490262 | -0.975367 |
| F | 2.256620  | -0.258627 | -0.297599 |

#### 2\_22

|   |           |           |           |
|---|-----------|-----------|-----------|
| C | 1.271589  | -0.588549 | -0.420395 |
| C | 1.409077  | 0.934768  | -0.512170 |
| C | 0.089600  | 1.662113  | -0.189992 |
| C | -0.693188 | 0.885886  | 0.871740  |

|   |           |           |           |
|---|-----------|-----------|-----------|
| C | -1.128392 | -0.478108 | 0.337183  |
| C | -0.149915 | -1.049124 | -0.696765 |
| H | 0.294530  | 2.685985  | 0.147647  |
| H | 2.197999  | 1.233210  | 0.190185  |
| H | 1.754216  | 1.200299  | -1.520493 |
| H | -0.444015 | -0.668220 | -1.684134 |
| H | -0.059975 | 0.730510  | 1.754775  |
| H | -1.591716 | 1.428948  | 1.190599  |
| H | -0.208677 | -2.143469 | -0.726386 |
| H | 1.985859  | -1.086812 | -1.088945 |
| H | -0.528078 | 1.743182  | -1.095464 |
| F | 1.614650  | -1.006345 | 0.889541  |
| F | -2.382746 | -0.342991 | -0.297338 |
| H | -1.279900 | -1.181518 | 1.164783  |

#### 2\_23

|   |           |           |           |
|---|-----------|-----------|-----------|
| C | -1.056974 | -0.407082 | -0.307106 |
| C | -1.261661 | 1.105676  | -0.183344 |
| C | 0.042502  | 1.815506  | 0.244237  |
| C | 1.269670  | 1.047451  | -0.262645 |
| C | 1.341208  | -0.331785 | 0.399213  |
| C | -0.045138 | -0.903278 | 0.710189  |
| H | 0.054377  | 2.845370  | -0.133562 |
| H | -1.626032 | 1.507167  | -1.137450 |
| H | -2.048995 | 1.270491  | 0.563672  |
| H | -0.361035 | -0.584142 | 1.712823  |
| H | 1.190715  | 0.895723  | -1.347794 |
| H | 2.197535  | 1.601963  | -0.076362 |
| H | 0.008729  | -1.998398 | 0.703464  |
| H | 0.091159  | 1.883044  | 1.340368  |
| H | -0.726172 | -0.681512 | -1.317894 |
| F | -2.286740 | -1.056257 | -0.107788 |
| F | 2.013580  | -1.210775 | -0.473241 |
| H | 1.940520  | -0.295342 | 1.318727  |

#### 2\_24

|   |           |           |           |
|---|-----------|-----------|-----------|
| C | 1.248239  | -0.250997 | 0.337269  |
| C | 1.164130  | 1.168103  | -0.231780 |
| C | -0.304994 | 1.614517  | -0.403581 |
| C | -1.196800 | 0.928434  | 0.635584  |
| C | -1.225958 | -0.585080 | 0.413185  |
| C | 0.095864  | -1.112532 | -0.156533 |
| H | -0.382745 | 2.705858  | -0.322032 |
| H | 1.707401  | 1.859020  | 0.425594  |
| H | 1.679876  | 1.163731  | -1.200752 |
| H | 0.047080  | -1.050111 | -1.251464 |
| H | -0.817269 | 1.133476  | 1.647225  |
| H | -2.229118 | 1.297757  | 0.593129  |
| H | 0.255967  | -2.161306 | 0.119022  |
| H | -0.667062 | 1.344183  | -1.404500 |
| H | 1.255729  | -0.233619 | 1.436929  |
| F | 2.466642  | -0.833574 | -0.046467 |
| H | -1.487423 | -1.100614 | 1.347360  |
| F | -2.249455 | -0.892321 | -0.504130 |

#### 2\_25

|   |           |           |           |
|---|-----------|-----------|-----------|
| C | 0.392454  | 0.655723  | -1.118371 |
| C | 0.006962  | 1.511682  | 0.089934  |
| C | -0.392454 | 0.658751  | 1.298163  |
| C | 0.392454  | -0.658751 | 1.298163  |

|   |           |           |           |
|---|-----------|-----------|-----------|
| C | -0.006962 | -1.511682 | 0.089934  |
| C | -0.392454 | -0.655723 | -1.118371 |
| H | -0.236475 | 1.215492  | 2.230041  |
| H | 0.825640  | 2.198441  | 0.345604  |
| H | -1.468300 | -0.437342 | -1.077228 |
| H | 1.468300  | 0.437342  | -1.077228 |
| H | 1.468511  | -0.451948 | 1.219689  |
| H | 0.236475  | -1.215492 | 2.230041  |
| H | -0.825640 | -2.198441 | 0.345604  |
| H | -0.212171 | -1.238749 | -2.029990 |
| H | 0.212171  | 1.238749  | -2.029990 |
| H | -1.468511 | 0.451948  | 1.219689  |
| F | -1.091768 | 2.325685  | -0.256275 |
| F | 1.091768  | -2.325685 | -0.256275 |

### 2\_26

|   |           |           |           |
|---|-----------|-----------|-----------|
| C | 0.811127  | -1.109761 | 0.655265  |
| C | 1.497266  | 0.210991  | 0.291517  |
| C | 0.491832  | 1.285301  | -0.129247 |
| C | -0.811127 | 1.109761  | 0.655265  |
| C | -1.497266 | -0.210991 | 0.291517  |
| C | -0.491832 | -1.285301 | -0.129247 |
| H | 0.916048  | 2.287034  | 0.010545  |
| H | 2.117128  | 0.557261  | 1.130352  |
| H | -0.292318 | -1.160405 | -1.201418 |
| H | 0.601017  | -1.119068 | 1.734433  |
| H | -0.601017 | 1.119068  | 1.734433  |
| H | -1.513735 | 1.928311  | 0.456627  |
| H | -0.916048 | -2.287033 | 0.010545  |
| H | 1.513735  | -1.928311 | 0.456628  |
| H | 0.292318  | 1.160405  | -1.201418 |
| F | 2.382450  | -0.014454 | -0.781750 |
| H | -2.117128 | -0.557261 | 1.130352  |
| F | -2.382450 | 0.014454  | -0.781750 |

### 3\_1

|   |           |           |           |
|---|-----------|-----------|-----------|
| C | -1.278710 | 0.738264  | -0.336532 |
| C | 0.000000  | 1.463744  | -0.741782 |
| C | 1.278710  | 0.738264  | -0.336532 |
| C | 1.267639  | -0.731872 | -0.741782 |
| C | 0.000000  | -1.476527 | -0.336532 |
| C | -1.267639 | -0.731872 | -0.741782 |
| H | 2.142857  | 1.237179  | -0.799176 |
| H | 0.000000  | 1.558457  | -1.837671 |
| H | 0.000000  | 2.475060  | -0.317138 |
| H | -2.142857 | 1.237179  | -0.799176 |
| H | 1.349664  | -0.779229 | -1.837671 |
| H | 2.143465  | -1.237530 | -0.317138 |
| H | 0.000000  | -2.474358 | -0.799176 |
| H | -1.349664 | -0.779229 | -1.837671 |
| H | -2.143465 | -1.237530 | -0.317138 |
| F | -1.460846 | 0.843420  | 1.047097  |
| F | 0.000000  | -1.686839 | 1.047097  |
| F | 1.460846  | 0.843420  | 1.047097  |

### 3\_2

|   |          |           |          |
|---|----------|-----------|----------|
| C | 0.384322 | -0.783754 | 1.279120 |
|---|----------|-----------|----------|

|   |           |           |           |
|---|-----------|-----------|-----------|
| C | 0.955596  | -1.387504 | 0.000000  |
| C | 0.384322  | -0.783754 | -1.279120 |
| C | 0.384322  | 0.740560  | -1.255308 |
| C | -0.301290 | 1.257543  | 0.000000  |
| C | 0.384322  | 0.740560  | 1.255308  |
| H | 0.950063  | -1.150989 | -2.146466 |
| H | 2.041038  | -1.211928 | 0.000000  |
| H | 0.789494  | -2.471651 | 0.000000  |
| H | 0.950063  | -1.150989 | 2.146466  |
| H | 1.424603  | 1.095851  | -1.263055 |
| H | -0.117513 | 1.125166  | -2.151308 |
| H | 1.424603  | 1.095851  | 1.263055  |
| H | -0.117513 | 1.125166  | 2.151308  |
| F | -0.938507 | -1.226590 | 1.453505  |
| F | -0.938507 | -1.226590 | -1.453505 |
| H | -1.359800 | 0.971821  | 0.000000  |
| F | -0.249055 | 2.660937  | 0.000000  |

### 3\_3

|   |           |           |           |
|---|-----------|-----------|-----------|
| C | -0.563177 | 1.489645  | 0.000000  |
| C | 0.068660  | 0.927898  | 1.267950  |
| C | 0.068660  | -0.594339 | 1.242665  |
| C | 0.764556  | -1.132518 | 0.000000  |
| C | 0.068660  | -0.594339 | -1.242665 |
| C | 0.068660  | 0.927898  | -1.267950 |
| H | 1.107316  | 1.280558  | 1.332437  |
| H | -0.475294 | 1.293252  | 2.147172  |
| H | -0.515853 | 2.586245  | 0.000000  |
| H | 1.811642  | -0.799921 | 0.000000  |
| H | 0.747269  | -2.229141 | 0.000000  |
| H | 1.107316  | 1.280558  | -1.332437 |
| H | -0.475294 | 1.293252  | -2.147172 |
| F | -1.933862 | 1.146814  | 0.000000  |
| H | -0.962276 | -0.969533 | -1.292980 |
| F | 0.731449  | -1.068474 | -2.383813 |
| F | 0.731449  | -1.068474 | 2.383813  |
| H | -0.962276 | -0.969533 | 1.292980  |

### 3\_4

|   |           |           |           |
|---|-----------|-----------|-----------|
| C | -1.244087 | 0.718274  | 0.323424  |
| C | 0.000000  | 1.455856  | -0.153912 |
| C | 1.244087  | 0.718274  | 0.323424  |
| C | 1.260809  | -0.727928 | -0.153912 |
| C | 0.000000  | -1.436548 | 0.323424  |
| C | -1.260809 | -0.727928 | -0.153912 |
| H | 0.000000  | 1.488224  | -1.251521 |
| H | 0.000000  | 2.484558  | 0.226195  |
| H | 1.288839  | -0.744112 | -1.251521 |
| H | 2.151690  | -1.242279 | 0.226195  |
| H | -1.288839 | -0.744112 | -1.251521 |
| H | -2.151690 | -1.242279 | 0.226195  |
| H | -1.301623 | 0.751493  | 1.422167  |
| F | -2.382935 | 1.375788  | -0.157102 |
| F | 0.000000  | -2.751577 | -0.157102 |
| H | 0.000000  | -1.502985 | 1.422167  |
| F | 2.382935  | 1.375788  | -0.157102 |
| H | 1.301623  | 0.751493  | 1.422167  |

### 3\_5

|   |           |           |           |
|---|-----------|-----------|-----------|
| C | -1.380760 | 0.006788  | -0.389235 |
| C | -0.580829 | 1.133604  | 0.262628  |
| C | 0.506935  | 0.612568  | 1.192162  |
| C | 1.361506  | -0.494663 | 0.583473  |
| C | 0.517964  | -1.599781 | -0.037379 |
| C | -0.482873 | -1.026489 | -1.046012 |
| H | -1.263926 | 1.794042  | 0.813554  |
| H | -2.099797 | 0.430053  | -1.102581 |
| H | 2.035058  | -0.904617 | 1.349158  |
| H | 1.178823  | -2.329578 | -0.520948 |
| H | -0.020823 | -2.114891 | 0.769106  |
| H | 0.054073  | -0.530372 | -1.864534 |
| H | -1.101873 | -1.822546 | -1.478042 |
| F | -2.123707 | -0.604313 | 0.640963  |
| F | -0.019274 | 1.888707  | -0.775708 |
| H | 0.012970  | 0.206522  | 2.085272  |
| H | 1.145040  | 1.447400  | 1.507035  |
| F | 2.188402  | 0.052477  | -0.415460 |

### 3\_6

|   |           |           |           |
|---|-----------|-----------|-----------|
| C | 1.483003  | -0.355369 | 0.054496  |
| C | 0.887741  | 1.003878  | -0.311472 |
| C | -0.548635 | 0.891392  | -0.797636 |
| C | -1.403700 | 0.122991  | 0.201425  |
| C | -0.834301 | -1.260713 | 0.469967  |
| C | 0.595102  | -1.131637 | 1.013151  |
| H | 1.520225  | 1.497624  | -1.060190 |
| H | 2.490196  | -0.216407 | 0.468687  |
| H | -1.471912 | -1.793734 | 1.186042  |
| H | -0.828811 | -1.828382 | -0.469597 |
| H | 0.591239  | -0.591690 | 1.970073  |
| H | 1.037484  | -2.119712 | 1.190043  |
| F | 1.616932  | -1.072287 | -1.147822 |
| F | 0.927748  | 1.788874  | 0.856435  |
| H | -0.548754 | 0.351383  | -1.753521 |
| H | -0.960976 | 1.893766  | -0.965436 |
| F | -2.702252 | 0.005268  | -0.318215 |
| H | -1.485804 | 0.687202  | 1.140734  |

### 3\_7

|   |           |           |           |
|---|-----------|-----------|-----------|
| C | 0.993319  | 0.771912  | -0.486369 |
| C | 0.805218  | -0.732514 | -0.395128 |
| C | -0.138914 | -1.109953 | 0.736865  |
| C | -1.482369 | -0.411654 | 0.555842  |
| C | -1.337206 | 1.095637  | 0.398368  |
| C | -0.350328 | 1.450864  | -0.721533 |
| H | -0.280082 | -2.196892 | 0.756775  |
| H | 0.406129  | -1.082797 | -1.356368 |
| H | 1.725561  | 1.016092  | -1.267429 |
| H | -2.159065 | -0.655454 | 1.385531  |
| H | -2.322132 | 1.532279  | 0.192307  |
| H | -0.978097 | 1.505360  | 1.351426  |
| H | -0.747161 | 1.119340  | -1.690064 |
| H | -0.202909 | 2.536401  | -0.773272 |
| H | 0.303824  | -0.796041 | 1.690182  |
| F | 1.526705  | 1.238599  | 0.728193  |
| F | 2.041980  | -1.355531 | -0.203962 |
| F | -2.089173 | -0.923517 | -0.615048 |

3\_8

|   |           |           |           |
|---|-----------|-----------|-----------|
| C | 1.234231  | 0.763688  | -0.210162 |
| C | 0.954898  | -0.699827 | -0.512088 |
| C | -0.314890 | -1.180660 | 0.174483  |
| C | -1.484880 | -0.318144 | -0.284956 |
| C | -1.247033 | 1.155155  | 0.009815  |
| C | 0.055692  | 1.622458  | -0.655288 |
| H | -0.496555 | -2.232992 | -0.074097 |
| H | 0.860660  | -0.800666 | -1.604291 |
| H | 2.173012  | 1.074271  | -0.688068 |
| H | -2.096291 | 1.746850  | -0.353398 |
| H | -1.177815 | 1.288158  | 1.096796  |
| H | -0.027647 | 1.559721  | -1.750147 |
| H | 0.260996  | 2.669206  | -0.401655 |
| H | -0.197404 | -1.088083 | 1.260725  |
| F | 1.407677  | 0.918643  | 1.172927  |
| F | 2.039701  | -1.484871 | -0.119299 |
| F | -2.651171 | -0.746248 | 0.362773  |
| H | -1.652923 | -0.460204 | -1.364295 |

3\_9

|   |           |           |           |
|---|-----------|-----------|-----------|
| C | 1.253033  | 0.413300  | 0.377199  |
| C | 0.628885  | -0.971180 | 0.456603  |
| C | -0.779379 | -0.887728 | 1.039664  |
| C | -1.661585 | 0.151763  | 0.350813  |
| C | -0.969909 | 1.501369  | 0.198399  |
| C | 0.407789  | 1.356401  | -0.460944 |
| H | -1.256559 | -1.873323 | 0.979185  |
| H | -1.614794 | 2.168301  | -0.386748 |
| H | -0.861746 | 1.941383  | 1.201286  |
| H | 0.303893  | 0.942511  | -1.470695 |
| H | 0.908280  | 2.329474  | -0.533918 |
| H | -0.700235 | -0.617894 | 2.102502  |
| H | 1.344362  | 0.800949  | 1.404279  |
| F | 2.545783  | 0.313562  | -0.141378 |
| H | 1.263774  | -1.634078 | 1.060833  |
| F | 0.576255  | -1.522007 | -0.826783 |
| H | -2.599942 | 0.265103  | 0.912076  |
| F | -2.017598 | -0.314441 | -0.925085 |

3\_10

|   |           |           |           |
|---|-----------|-----------|-----------|
| C | -1.264930 | 0.404094  | -0.494571 |
| C | -0.723407 | -1.008244 | -0.332642 |
| C | 0.770546  | -1.038575 | -0.630429 |
| C | 1.507851  | -0.038871 | 0.254576  |
| C | 0.955636  | 1.370978  | 0.099347  |
| C | -0.547206 | 1.388813  | 0.415043  |
| H | 1.161135  | -2.050084 | -0.467879 |
| H | 1.499705  | 2.056028  | 0.760928  |
| H | 1.129696  | 1.698193  | -0.936115 |
| H | -0.726846 | 1.097134  | 1.457541  |
| H | -0.964500 | 2.391763  | 0.266434  |
| H | 0.938177  | -0.772127 | -1.683188 |
| F | 2.865958  | -0.047382 | -0.100116 |
| H | 1.448235  | -0.354233 | 1.304616  |
| H | -1.131477 | 0.694979  | -1.547803 |
| F | -2.636877 | 0.410901  | -0.233190 |
| H | -1.282893 | -1.703835 | -0.971714 |

F -0.924877 -1.422074 0.994333

3\_11

C -1.043551 0.650560 -0.254161  
C -0.735162 -0.762159 0.203063  
C 0.522755 -1.295059 -0.474484  
C 1.711590 -0.367267 -0.265344  
C 1.398222 1.061445 -0.688010  
C 0.136314 1.575265 0.013435  
H 0.749910 -2.296139 -0.089441  
H 2.255395 1.705714 -0.457255  
H 1.259814 1.069248 -1.779049  
H 0.306539 1.620136 1.096683  
H -0.116023 2.586395 -0.328101  
H 0.331469 -1.382697 -1.553027  
H -1.299475 0.631891 -1.324213  
F -2.165575 1.125455 0.431762  
H 2.594484 -0.749314 -0.795218  
F 2.036969 -0.364716 1.107512  
H -0.632528 -0.771228 1.295775  
F -1.803683 -1.604152 -0.125180

3\_12

C 1.193094 -0.527192 -0.299622  
C 0.788786 0.808960 0.295923  
C -0.644101 1.165198 -0.080321  
C -1.600981 0.058325 0.342036  
C -1.213629 -1.273852 -0.280806  
C 0.223947 -1.625798 0.119491  
H -0.922811 2.114893 0.391460  
H 0.915150 0.760118 1.387331  
H -1.908477 -2.056426 0.047499  
H -1.298094 -1.184937 -1.373078  
H 0.294672 -1.750740 1.209538  
H 0.537258 -2.571345 -0.338519  
H -0.707762 1.292628 -1.169436  
F 1.642036 1.810247 -0.174555  
F -2.899241 0.406577 -0.053284  
H -1.615944 -0.033376 1.438791  
H 1.236089 -0.431690 -1.394252  
F 2.478006 -0.858266 0.141222

3\_13

C 1.285851 -0.336425 0.120995  
C 0.000000 -1.158364 0.022885  
C -1.285851 -0.336425 0.120995  
C -1.254918 0.906724 -0.753255  
C 0.000000 1.743499 -0.483635  
C 1.254918 0.906724 -0.753255  
H -2.131332 -0.985903 -0.144280  
H 0.000000 -1.942168 0.790698  
H 2.131332 -0.985903 -0.144280  
H -1.266329 0.576105 -1.801654  
H -2.170712 1.484234 -0.573765  
H 0.000000 2.638664 -1.118196  
H 0.000000 2.078054 0.561509  
H 1.266329 0.576105 -1.801654

|   |           |           |           |
|---|-----------|-----------|-----------|
| H | 2.170712  | 1.484234  | -0.573765 |
| F | 1.449030  | 0.036321  | 1.462231  |
| F | 0.000000  | -1.770178 | -1.240349 |
| F | -1.449030 | 0.036321  | 1.462231  |

3\_14

|   |           |           |           |
|---|-----------|-----------|-----------|
| C | -1.186241 | -0.812641 | 0.049756  |
| C | 0.330395  | -1.012994 | 0.053274  |
| C | 1.027164  | 0.182968  | -0.573230 |
| C | 0.683049  | 1.475696  | 0.146781  |
| C | -0.837163 | 1.690109  | 0.088515  |
| C | -1.581177 | 0.500145  | 0.707305  |
| H | 0.608896  | -1.937975 | -0.467537 |
| H | -1.670314 | -1.666936 | 0.540432  |
| H | 1.020366  | 1.402609  | 1.188726  |
| H | 1.217789  | 2.306755  | -0.329308 |
| H | -1.108527 | 2.613160  | 0.615789  |
| H | -1.151391 | 1.808828  | -0.957685 |
| H | -1.337344 | 0.419504  | 1.775428  |
| H | -2.667923 | 0.624930  | 0.618726  |
| H | 0.710193  | 0.238997  | -1.623838 |
| F | -1.598408 | -0.813060 | -1.295702 |
| F | 0.719560  | -1.143851 | 1.391810  |
| F | 2.407968  | -0.037486 | -0.562236 |

3\_15

|   |           |           |           |
|---|-----------|-----------|-----------|
| C | -0.219544 | -1.277680 | -0.202106 |
| C | -0.843756 | 0.000000  | -0.744528 |
| C | -0.219544 | 1.277680  | -0.202106 |
| C | 1.287715  | 1.262141  | -0.437960 |
| C | 1.922447  | 0.000000  | 0.158247  |
| C | 1.287715  | -1.262141 | -0.437960 |
| H | -0.696833 | 2.141130  | -0.686407 |
| H | -0.675569 | 0.000000  | -1.832743 |
| H | -0.696833 | -2.141130 | -0.686407 |
| H | 1.470723  | 1.300379  | -1.522256 |
| H | 1.720591  | 2.168642  | 0.003157  |
| H | 3.003370  | 0.000000  | -0.030883 |
| H | 1.774705  | 0.000000  | 1.245312  |
| H | 1.470723  | -1.300379 | -1.522256 |
| H | 1.720591  | -2.168642 | 0.003157  |
| F | -0.467340 | -1.396358 | 1.167323  |
| F | -2.218838 | 0.000000  | -0.531558 |
| F | -0.467340 | 1.396358  | 1.167323  |

3\_16

|   |           |           |           |
|---|-----------|-----------|-----------|
| C | 0.917156  | -0.992110 | -0.323742 |
| C | -0.554139 | -0.648066 | -0.507918 |
| C | -0.949966 | 0.547486  | 0.339627  |
| C | -0.071685 | 1.748539  | 0.011467  |
| C | 1.413341  | 1.412569  | 0.194754  |
| C | 1.802860  | 0.199697  | -0.659060 |
| H | -0.736978 | -0.412762 | -1.566562 |
| H | 1.164716  | -1.877561 | -0.924221 |
| H | -0.264422 | 2.037129  | -1.032154 |
| H | -0.370282 | 2.590910  | 0.647672  |
| H | 2.028190  | 2.278453  | -0.080652 |
| H | 1.616894  | 1.188554  | 1.250109  |
| H | 1.684465  | 0.434044  | -1.727064 |
| H | 2.850745  | -0.079404 | -0.492736 |

|   |           |           |           |
|---|-----------|-----------|-----------|
| F | 1.127408  | -1.341057 | 1.021056  |
| F | -1.334735 | -1.753565 | -0.180217 |
| F | -2.285466 | 0.867368  | 0.069572  |
| H | -0.883593 | 0.277244  | 1.401123  |

### 3\_17

|   |           |           |           |
|---|-----------|-----------|-----------|
| C | -1.237042 | -0.128643 | -0.521048 |
| C | 0.000000  | -0.949798 | -0.187115 |
| C | 1.237042  | -0.128643 | -0.521048 |
| C | 1.271234  | 1.160883  | 0.283760  |
| C | 0.000000  | 1.976565  | 0.000349  |
| C | -1.271234 | 1.160883  | 0.283760  |
| H | 1.332480  | 0.905652  | 1.348967  |
| H | 2.169300  | 1.730111  | 0.014386  |
| H | 0.000000  | 2.888166  | 0.610171  |
| H | 0.000000  | 2.296632  | -1.052874 |
| H | -1.332480 | 0.905652  | 1.348967  |
| H | -2.169300 | 1.730111  | 0.014386  |
| H | -1.220585 | 0.095379  | -1.598557 |
| H | 0.000000  | -1.905074 | -0.728328 |
| H | 1.220585  | 0.095379  | -1.598557 |
| F | -2.379542 | -0.893234 | -0.277406 |
| F | 0.000000  | -1.245699 | 1.178090  |
| F | 2.379542  | -0.893234 | -0.277406 |

### 3\_18

|   |           |           |           |
|---|-----------|-----------|-----------|
| C | -0.210341 | -0.171908 | 1.256070  |
| C | 0.432507  | -0.738521 | 0.000000  |
| C | -0.210341 | -0.171908 | -1.256070 |
| C | -0.210341 | 1.348947  | -1.257317 |
| C | -0.906413 | 1.880963  | 0.000000  |
| C | -0.210341 | 1.348947  | 1.257317  |
| H | 0.831227  | 1.699071  | -1.284825 |
| H | -0.705443 | 1.702375  | -2.170185 |
| H | -0.895045 | 2.977685  | 0.000000  |
| H | -1.961816 | 1.569869  | 0.000000  |
| H | 0.831227  | 1.699071  | 1.284825  |
| H | -0.705443 | 1.702375  | 2.170185  |
| H | -1.235337 | -0.562794 | 1.333905  |
| H | -1.235337 | -0.562794 | -1.333905 |
| F | 0.494419  | -0.641966 | 2.368071  |
| F | 0.494419  | -0.641966 | -2.368071 |
| H | 1.509059  | -0.518477 | 0.000000  |
| F | 0.284332  | -2.125568 | 0.000000  |

### 3\_19

|   |           |           |           |
|---|-----------|-----------|-----------|
| C | -0.959060 | -0.968873 | 0.067619  |
| C | 0.567577  | -0.853999 | 0.173260  |
| C | 1.068037  | 0.534223  | -0.191464 |
| C | 0.090766  | 1.592206  | 0.292212  |
| C | -1.235678 | 1.479169  | -0.491275 |
| C | -1.538524 | 0.026422  | -0.919339 |
| H | 0.874554  | -1.091573 | 1.199617  |
| H | -1.087600 | -0.194628 | -1.897280 |
| H | -0.083273 | 1.445960  | 1.365568  |
| H | 0.542603  | 2.581782  | 0.157766  |
| H | -1.195397 | 2.111731  | -1.387179 |
| H | -2.051743 | 1.858165  | 0.133875  |
| H | -2.618788 | -0.133789 | -1.018622 |

|   |           |           |           |
|---|-----------|-----------|-----------|
| H | -1.209310 | -2.005145 | -0.193394 |
| H | 1.201419  | 0.592888  | -1.280900 |
| F | -1.501910 | -0.713514 | 1.340415  |
| F | 1.137524  | -1.798399 | -0.688911 |
| F | 2.327589  | 0.731881  | 0.385659  |

### 3\_20

|   |           |           |           |
|---|-----------|-----------|-----------|
| C | 0.611732  | -1.090002 | 0.331808  |
| C | -0.698185 | -0.800735 | -0.416274 |
| C | -0.978558 | 0.689520  | -0.591599 |
| C | 0.324637  | 1.393707  | -0.935735 |
| C | 1.312601  | 1.337776  | 0.252183  |
| C | 1.106153  | 0.093351  | 1.140411  |
| H | -0.610624 | -1.248382 | -1.415224 |
| H | 0.350484  | 0.294596  | 1.909459  |
| H | 0.754526  | 0.887588  | -1.811037 |
| H | 0.121550  | 2.432522  | -1.220949 |
| H | 1.195491  | 2.235587  | 0.869519  |
| H | 2.335483  | 1.345594  | -0.141832 |
| H | 2.039132  | -0.181228 | 1.647742  |
| H | 0.468151  | -1.983779 | 0.951930  |
| F | 1.586749  | -1.405684 | -0.638725 |
| F | -1.761760 | -1.411933 | 0.244754  |
| H | -1.755424 | 0.839265  | -1.352873 |
| F | -1.488217 | 1.221676  | 0.602693  |

### 3\_21

|   |           |           |           |
|---|-----------|-----------|-----------|
| C | 1.252365  | 0.705808  | -0.012616 |
| C | 1.055322  | -0.781993 | -0.330949 |
| C | -0.366713 | -1.260684 | -0.043014 |
| C | -1.352481 | -0.139052 | -0.340897 |
| C | -1.168862 | 1.032362  | 0.628422  |
| C | 0.303803  | 1.185965  | 1.068789  |
| H | -0.607147 | -2.148715 | -0.638430 |
| H | 1.328600  | -0.939620 | -1.382110 |
| H | 0.506249  | 0.576411  | 1.960279  |
| H | -1.238020 | 0.194502  | -1.380340 |
| H | -1.798927 | 0.835279  | 1.504761  |
| H | -1.528488 | 1.955828  | 0.161418  |
| H | 0.526882  | 2.227352  | 1.329222  |
| H | 2.303687  | 0.871379  | 0.254062  |
| H | -0.437542 | -1.527970 | 1.019623  |
| F | 0.996985  | 1.428447  | -1.195260 |
| F | 1.952513  | -1.516233 | 0.457411  |
| F | -2.660154 | -0.634312 | -0.222917 |

### 3\_22

|   |           |           |           |
|---|-----------|-----------|-----------|
| C | -0.848699 | 0.976433  | 0.052155  |
| C | -1.064577 | -0.527293 | 0.284827  |
| C | -0.022098 | -1.402830 | -0.403724 |
| C | 1.370204  | -0.813098 | -0.236127 |
| C | 1.482019  | 0.597342  | -0.835821 |
| C | 0.114223  | 1.253365  | -1.087255 |
| H | -0.059864 | -2.422945 | -0.004030 |
| H | -1.074290 | -0.702254 | 1.366158  |
| H | -0.341981 | 0.855110  | -2.004691 |
| H | 2.043795  | 0.551776  | -1.777122 |
| H | 2.065719  | 1.202330  | -0.132860 |
| H | 0.224617  | 2.336380  | -1.222884 |
| H | -1.828479 | 1.437730  | -0.126318 |

|   |           |           |           |
|---|-----------|-----------|-----------|
| H | -0.255365 | -1.448854 | -1.476105 |
| F | -0.327898 | 1.539946  | 1.227808  |
| F | -2.329770 | -0.875758 | -0.217459 |
| H | 2.125437  | -1.480949 | -0.669526 |
| F | 1.648109  | -0.756614 | 1.145545  |

### 3\_23

|   |           |           |           |
|---|-----------|-----------|-----------|
| C | -1.228253 | 0.793558  | -0.166090 |
| C | -1.078293 | -0.665255 | -0.600517 |
| C | 0.375576  | -1.153558 | -0.559930 |
| C | 1.237985  | -0.296720 | 0.355005  |
| C | 1.268426  | 1.161505  | -0.113887 |
| C | -0.076107 | 1.604405  | -0.738579 |
| H | 0.388792  | -2.199332 | -0.232521 |
| H | -0.066791 | 1.448397  | -1.826737 |
| H | 2.068378  | 1.248563  | -0.859914 |
| H | 1.529076  | 1.811895  | 0.727904  |
| H | -0.248022 | 2.672897  | -0.565692 |
| H | -2.210823 | 1.179225  | -0.467352 |
| H | 0.806758  | -1.110700 | -1.569312 |
| F | -1.181595 | 0.873987  | 1.233767  |
| H | 0.886268  | -0.371165 | 1.389428  |
| F | 2.548649  | -0.803742 | 0.337374  |
| F | -1.887485 | -1.470114 | 0.203743  |
| H | -1.465760 | -0.744576 | -1.625760 |

### 3\_24

|   |           |           |           |
|---|-----------|-----------|-----------|
| C | 1.222669  | 0.312600  | -0.568503 |
| C | 0.693784  | -1.050815 | -0.169628 |
| C | -0.797806 | -1.138188 | -0.503930 |
| C | -1.495755 | 0.223600  | -0.405489 |
| C | -0.862965 | 1.098541  | 0.665399  |
| C | 0.597739  | 1.423427  | 0.280056  |
| H | -0.932499 | -1.563309 | -1.506039 |
| H | 1.209006  | 1.531910  | 1.182401  |
| H | -0.893186 | 0.554334  | 1.616431  |
| H | -1.448587 | 2.018202  | 0.779707  |
| H | 0.655158  | 2.366060  | -0.277317 |
| H | -1.265562 | -1.818571 | 0.217531  |
| H | 0.995215  | 0.451856  | -1.636057 |
| F | 2.614197  | 0.352688  | -0.449373 |
| F | 0.873742  | -1.213815 | 1.214845  |
| H | 1.269684  | -1.848912 | -0.654822 |
| H | -1.470675 | 0.745815  | -1.373589 |
| F | -2.850667 | 0.010863  | -0.113880 |

### 3\_25

|   |           |           |           |
|---|-----------|-----------|-----------|
| C | -0.894645 | -0.553158 | -0.496734 |
| C | -0.729232 | 0.949911  | -0.401986 |
| C | 0.752287  | 1.317482  | -0.493373 |
| C | 1.667462  | 0.250524  | 0.114275  |
| C | 0.984560  | -0.530391 | 1.225862  |
| C | -0.281685 | -1.255432 | 0.715460  |
| H | 1.041507  | 1.460918  | -1.541564 |
| H | -1.042193 | -1.272596 | 1.503847  |
| H | 0.714297  | 0.188881  | 2.009077  |
| H | 1.692316  | -1.248462 | 1.656245  |
| H | -0.053578 | -2.292175 | 0.445855  |
| H | 0.891854  | 2.271735  | 0.028781  |
| H | -0.414819 | -0.881606 | -1.427601 |

|   |           |           |           |
|---|-----------|-----------|-----------|
| F | -2.251461 | -0.881788 | -0.595001 |
| F | -1.230486 | 1.382910  | 0.840949  |
| H | -1.325105 | 1.456330  | -1.171612 |
| F | 2.026004  | -0.663232 | -0.906198 |
| H | 2.606723  | 0.702358  | 0.458203  |

### 3\_26

|   |           |           |           |
|---|-----------|-----------|-----------|
| C | -1.227089 | -0.439345 | -0.259362 |
| C | -0.807476 | 0.878993  | 0.385621  |
| C | 0.684323  | 0.909876  | 0.720406  |
| C | 1.465078  | 0.102377  | -0.303088 |
| C | 1.094267  | -1.384486 | -0.230511 |
| C | -0.363315 | -1.587963 | 0.236069  |
| H | 1.024305  | 1.951805  | 0.737923  |
| H | -0.420955 | -1.622327 | 1.332270  |
| H | 1.782942  | -1.861365 | 0.477546  |
| H | 1.253270  | -1.851960 | -1.209824 |
| H | -0.766365 | -2.534606 | -0.141756 |
| H | 0.848890  | 0.479826  | 1.717218  |
| H | -1.147844 | -0.337182 | -1.350772 |
| F | -2.573065 | -0.686978 | 0.032475  |
| H | 1.281899  | 0.508119  | -1.307555 |
| F | 2.839953  | 0.244488  | -0.066416 |
| F | -1.101904 | 1.925993  | -0.503248 |
| H | -1.415714 | 1.039448  | 1.284856  |

### 3\_27

|   |           |           |           |
|---|-----------|-----------|-----------|
| C | 0.967956  | 0.488609  | -0.312975 |
| C | 0.743269  | -0.759814 | 0.527292  |
| C | -0.704607 | -0.877553 | 1.025089  |
| C | -1.682597 | -0.114403 | 0.146714  |
| C | -1.350787 | 1.379061  | 0.095786  |
| C | 0.160039  | 1.649777  | 0.246733  |
| H | -0.969545 | -1.940176 | 1.073099  |
| H | 0.427219  | 1.776267  | 1.305546  |
| H | -1.901421 | 1.894655  | 0.892804  |
| H | -1.723576 | 1.765044  | -0.860723 |
| H | 0.445743  | 2.571380  | -0.273173 |
| H | -0.775946 | -0.465770 | 2.041014  |
| H | 0.696407  | 0.278672  | -1.354029 |
| F | 2.331078  | 0.812576  | -0.290207 |
| F | 1.079414  | -1.892557 | -0.221832 |
| H | 1.437056  | -0.724618 | 1.378384  |
| H | -2.717912 | -0.273580 | 0.475890  |
| F | -1.601343 | -0.639568 | -1.160255 |

### 3\_28

|   |           |           |           |
|---|-----------|-----------|-----------|
| C | -0.558633 | -1.064215 | 0.116465  |
| C | -1.454617 | 0.102951  | -0.322060 |
| C | -0.745720 | 1.452654  | -0.248832 |
| C | 0.737268  | 1.275993  | -0.600231 |
| C | 1.424615  | 0.476746  | 0.505896  |
| C | 0.523324  | -0.623298 | 1.083909  |
| H | -1.233489 | 2.173097  | -0.915609 |
| H | -1.806006 | -0.109397 | -1.339970 |
| H | 0.018539  | -0.250426 | 1.985874  |
| H | 0.840181  | 0.717365  | -1.538689 |
| H | 1.231130  | 2.246014  | -0.729609 |
| H | 1.741856  | 1.146202  | 1.317734  |
| H | 1.146443  | -1.475407 | 1.380014  |

|   |           |           |           |
|---|-----------|-----------|-----------|
| H | -1.192624 | -1.847008 | 0.552816  |
| H | -0.844413 | 1.834566  | 0.777153  |
| F | 0.040504  | -1.601624 | -1.035453 |
| F | -2.578774 | 0.125510  | 0.519085  |
| F | 2.598377  | -0.097219 | -0.005921 |

### 3\_29

|   |           |           |           |
|---|-----------|-----------|-----------|
| C | -0.848833 | 0.944595  | -0.289779 |
| C | -1.388702 | -0.408935 | 0.196423  |
| C | -0.279395 | -1.416774 | 0.476981  |
| C | 0.915452  | -0.684158 | 1.094904  |
| C | 1.548069  | 0.274627  | 0.084992  |
| C | 0.527178  | 0.829795  | -0.915702 |
| H | -0.647808 | -2.214849 | 1.132292  |
| H | -1.994517 | -0.222188 | 1.092734  |
| H | 0.454890  | 0.124880  | -1.754705 |
| H | 0.588099  | -0.108475 | 1.970686  |
| H | 1.686216  | -1.388881 | 1.428259  |
| H | 0.851852  | 1.796460  | -1.317376 |
| H | -1.576652 | 1.382523  | -0.984030 |
| H | 0.020563  | -1.878658 | -0.472885 |
| F | -0.764276 | 1.803114  | 0.826371  |
| F | -2.241608 | -0.916897 | -0.795218 |
| H | 2.072380  | 1.084684  | 0.605784  |
| F | 2.528368  | -0.420705 | -0.652007 |

### 3\_30

|   |           |           |           |
|---|-----------|-----------|-----------|
| C | 0.693784  | -1.050815 | -0.169628 |
| C | 1.222669  | 0.312600  | -0.568503 |
| C | 0.597739  | 1.423427  | 0.280056  |
| C | -0.862965 | 1.098541  | 0.665400  |
| C | -1.495755 | 0.223600  | -0.405489 |
| C | -0.797806 | -1.138188 | -0.503930 |
| H | 1.209006  | 1.531910  | 1.182401  |
| H | -0.932499 | -1.563309 | -1.506039 |
| H | -0.893186 | 0.554334  | 1.616431  |
| H | -1.448587 | 2.018202  | 0.779708  |
| H | -1.265562 | -1.818571 | 0.217531  |
| H | 1.269684  | -1.848912 | -0.654822 |
| H | 0.655158  | 2.366060  | -0.277317 |
| F | 0.873742  | -1.213815 | 1.214845  |
| F | -2.850667 | 0.010863  | -0.113880 |
| H | -1.470675 | 0.745815  | -1.373589 |
| H | 0.995215  | 0.451856  | -1.636057 |
| F | 2.614197  | 0.352688  | -0.449373 |

### 3\_31

|   |           |           |           |
|---|-----------|-----------|-----------|
| C | -0.748032 | 1.009795  | -0.401116 |
| C | -1.235305 | -0.424033 | -0.636661 |
| C | -0.231448 | -1.482459 | -0.164843 |
| C | 0.719923  | -0.931592 | 0.899160  |
| C | 1.531116  | 0.238268  | 0.344977  |
| C | 0.746041  | 1.083519  | -0.671833 |
| H | -0.794616 | -2.346103 | 0.208127  |
| H | 0.940285  | 0.671774  | -1.671702 |
| H | 0.148675  | -0.587116 | 1.768513  |
| H | 1.421494  | -1.704096 | 1.237255  |
| H | 1.090787  | 2.123495  | -0.664975 |
| H | -1.318834 | 1.712090  | -1.022252 |
| H | 0.357375  | -1.823305 | -1.027090 |

|   |           |           |           |
|---|-----------|-----------|-----------|
| F | -0.981915 | 1.383562  | 0.931624  |
| H | -1.417505 | -0.535177 | -1.715290 |
| F | -2.466459 | -0.595459 | 0.001697  |
| H | 1.910714  | 0.862015  | 1.162727  |
| F | 2.667024  | -0.269722 | -0.321478 |

### 3\_32

|   |           |           |           |
|---|-----------|-----------|-----------|
| C | -0.594932 | -0.763283 | -0.427851 |
| C | -1.239790 | 0.621538  | -0.391346 |
| C | -0.187323 | 1.702391  | -0.091346 |
| C | 1.241556  | 1.223019  | -0.378198 |
| C | 1.593254  | 0.003767  | 0.481636  |
| C | 0.390129  | -0.916952 | 0.716185  |
| H | -0.406407 | 2.620368  | -0.648688 |
| H | -0.110790 | -0.655484 | 1.656876  |
| H | 1.345459  | 0.933833  | -1.432054 |
| H | 1.960285  | 2.030520  | -0.195280 |
| H | 0.739868  | -1.952654 | 0.789869  |
| H | -0.283353 | 1.941062  | 0.976390  |
| F | -1.584772 | -1.742017 | -0.373523 |
| H | -0.076444 | -0.885011 | -1.389133 |
| H | -1.782145 | 0.808707  | -1.327181 |
| H | 2.021012  | 0.312853  | 1.444060  |
| F | -2.197472 | 0.641881  | 0.631845  |
| F | 2.601705  | -0.719538 | -0.183804 |

### 3\_33

|   |           |           |           |
|---|-----------|-----------|-----------|
| C | -0.909868 | -0.631846 | -0.526579 |
| C | -1.110333 | 0.849093  | -0.208204 |
| C | 0.241975  | 1.579679  | -0.161209 |
| C | 1.347308  | 0.796368  | -0.877438 |
| C | 1.565044  | -0.576393 | -0.235901 |
| C | 0.255953  | -1.202855 | 0.265326  |
| H | 0.148868  | 2.592583  | -0.569683 |
| H | 0.128403  | -0.943869 | 1.323375  |
| H | 1.100598  | 0.661156  | -1.939786 |
| H | 2.296785  | 1.343865  | -0.836635 |
| H | 0.274471  | -2.294543 | 0.178314  |
| H | 0.509618  | 1.676226  | 0.898743  |
| F | -2.081843 | -1.333858 | -0.255997 |
| H | -0.723782 | -0.732501 | -1.606001 |
| H | -1.807158 | 1.293439  | -0.931187 |
| F | -1.720616 | 0.957036  | 1.047523  |
| H | 2.077971  | -1.242239 | -0.942867 |
| F | 2.430654  | -0.427444 | 0.862891  |

### 3\_34

|   |           |           |           |
|---|-----------|-----------|-----------|
| C | 0.641374  | 0.833292  | -0.160111 |
| C | 1.300735  | -0.473865 | 0.266334  |
| C | 0.267042  | -1.518498 | 0.693128  |
| C | -1.046939 | -1.335282 | -0.072382 |
| C | -1.683114 | 0.009837  | 0.292314  |
| C | -0.634864 | 1.075855  | 0.627328  |
| H | 0.695898  | -2.513082 | 0.522384  |
| H | -0.408544 | 1.051211  | 1.701944  |
| H | -0.846434 | -1.333500 | -1.151717 |
| H | -1.745987 | -2.155132 | 0.129568  |
| H | -1.042237 | 2.065875  | 0.392971  |
| H | 0.086797  | -1.423267 | 1.772982  |
| F | 1.533451  | 1.892985  | 0.039400  |

|   |           |           |           |
|---|-----------|-----------|-----------|
| H | 0.427906  | 0.787305  | -1.235802 |
| F | -2.448780 | 0.452038  | -0.802274 |
| H | -2.381143 | -0.098024 | 1.132881  |
| H | 2.014606  | -0.264242 | 1.073957  |
| F | 2.041300  | -0.974487 | -0.816995 |

### 3\_35

|   |           |           |           |
|---|-----------|-----------|-----------|
| C | -0.851392 | 0.777319  | 0.269529  |
| C | -1.178010 | -0.531636 | -0.441581 |
| C | 0.062375  | -1.410928 | -0.605687 |
| C | 1.046911  | -1.171128 | 0.540067  |
| C | 1.593064  | 0.256022  | 0.481056  |
| C | 0.556914  | 1.247679  | -0.064518 |
| H | -0.261323 | -2.457448 | -0.654079 |
| H | 0.672163  | 1.297834  | -1.155077 |
| H | 0.540716  | -1.326373 | 1.503029  |
| H | 1.893357  | -1.867018 | 0.499036  |
| H | 0.716894  | 2.254094  | 0.337701  |
| H | 0.551210  | -1.172446 | -1.559629 |
| F | -1.775443 | 1.758667  | -0.104267 |
| H | -0.967694 | 0.624929  | 1.351335  |
| H | -1.641732 | -0.303447 | -1.410246 |
| F | -2.137119 | -1.220631 | 0.320644  |
| F | 2.707927  | 0.281877  | -0.377910 |
| H | 1.958955  | 0.566689  | 1.468525  |

### 3\_36

|   |           |           |           |
|---|-----------|-----------|-----------|
| C | -0.327196 | -1.004604 | -0.270469 |
| C | -1.210288 | 0.251033  | -0.326796 |
| C | -0.458495 | 1.533122  | 0.005134  |
| C | 0.919468  | 1.480363  | -0.668350 |
| C | 1.793168  | 0.367769  | -0.053626 |
| C | 0.971647  | -0.796302 | 0.498014  |
| H | -1.037548 | 2.397415  | -0.342089 |
| H | -1.615154 | 0.299099  | -1.347152 |
| H | 0.783028  | 1.291156  | -1.742165 |
| H | 1.424985  | 2.448770  | -0.574539 |
| H | 2.386683  | 0.757083  | 0.783350  |
| H | 2.495902  | -0.019852 | -0.801018 |
| H | 1.555110  | -1.725952 | 0.509395  |
| H | -0.907752 | -1.830477 | 0.157928  |
| H | -0.347625 | 1.608692  | 1.093131  |
| F | 0.040801  | -1.354726 | -1.580273 |
| F | -2.290645 | 0.085267  | 0.547005  |
| F | 0.597904  | -0.532121 | 1.828792  |

### 3\_37

|   |           |           |           |
|---|-----------|-----------|-----------|
| C | -0.058132 | -0.923471 | 0.316503  |
| C | 1.361164  | -0.349521 | 0.199948  |
| C | 1.374989  | 1.111719  | -0.246857 |
| C | 0.157112  | 1.849963  | 0.328268  |
| C | -1.161553 | 1.266129  | -0.229334 |
| C | -0.991705 | -0.199535 | -0.628333 |
| H | 2.312479  | 1.585352  | 0.067897  |
| H | 1.840997  | -0.471049 | 1.179518  |
| H | 0.166331  | 1.754892  | 1.421541  |
| H | 0.226251  | 2.919197  | 0.095818  |
| H | -1.503182 | 1.833122  | -1.103919 |
| H | -1.951548 | 1.314563  | 0.528718  |
| H | -0.043742 | -2.001362 | 0.114035  |

|   |           |           |           |
|---|-----------|-----------|-----------|
| H | 1.346324  | 1.136050  | -1.344665 |
| F | -0.494475 | -0.739285 | 1.636168  |
| F | 2.073014  | -1.127715 | -0.724581 |
| H | -0.561834 | -0.291801 | -1.635981 |
| F | -2.236686 | -0.834186 | -0.663158 |

### 3\_38

|   |           |           |           |
|---|-----------|-----------|-----------|
| C | 0.477623  | -0.708707 | -0.482600 |
| C | -1.007431 | -0.905329 | -0.260627 |
| C | -1.771062 | 0.360479  | -0.658259 |
| C | -0.940272 | 1.642163  | -0.432533 |
| C | 0.026892  | 1.459327  | 0.742379  |
| C | 1.043925  | 0.354933  | 0.452282  |
| H | -2.071260 | 0.280813  | -1.711193 |
| H | -0.361408 | 1.881550  | -1.335366 |
| H | -1.608497 | 2.492592  | -0.250682 |
| H | -0.535977 | 1.188403  | 1.643845  |
| H | 0.581526  | 2.381999  | 0.952063  |
| H | -2.688777 | 0.379320  | -0.057687 |
| H | -1.358450 | -1.788988 | -0.807929 |
| F | -1.221415 | -1.172076 | 1.106771  |
| F | 1.164315  | -1.911102 | -0.315721 |
| H | 0.633294  | -0.381615 | -1.520116 |
| H | 1.392213  | -0.126708 | 1.373289  |
| F | 2.172576  | 0.913783  | -0.174392 |

### 3\_39

|   |           |           |           |
|---|-----------|-----------|-----------|
| C | 0.218318  | -0.811104 | -0.202800 |
| C | -1.183054 | -0.551930 | 0.352919  |
| C | -1.418400 | 0.917395  | 0.690539  |
| C | -0.691714 | 1.816011  | -0.313394 |
| C | 0.835243  | 1.626452  | -0.188740 |
| C | 1.208187  | 0.222817  | 0.303224  |
| H | -2.500655 | 1.095478  | 0.692497  |
| H | -1.026780 | 1.550353  | -1.324941 |
| H | -0.954392 | 2.869092  | -0.157247 |
| H | 1.263094  | 2.365872  | 0.498877  |
| H | 1.321057  | 1.767917  | -1.162176 |
| H | -1.049462 | 1.114598  | 1.707245  |
| F | 0.634746  | -2.088035 | 0.174111  |
| H | 0.185687  | -0.784104 | -1.300220 |
| H | -1.334072 | -1.195158 | 1.229411  |
| F | -2.116983 | -0.952775 | -0.616712 |
| F | 2.485616  | -0.100498 | -0.161185 |
| H | 1.253636  | 0.169883  | 1.400145  |

### 3\_40

|   |           |           |           |
|---|-----------|-----------|-----------|
| C | -1.678742 | -0.475188 | -0.161192 |
| C | -0.483616 | -1.416400 | -0.313774 |
| C | 0.850416  | -0.671701 | -0.432782 |
| C | 0.823385  | 0.618722  | 0.362616  |
| C | -0.226233 | 1.581612  | -0.207693 |
| C | -1.427474 | 0.855475  | -0.849773 |
| H | -0.437658 | -2.063152 | 0.570476  |
| H | -0.626723 | -2.058637 | -1.191030 |
| H | -1.230973 | 0.645489  | -1.910600 |
| H | 0.636080  | 0.387244  | 1.418356  |
| H | 0.278216  | 2.198913  | -0.961038 |
| H | -0.568088 | 2.248665  | 0.590163  |
| H | -2.323892 | 1.484717  | -0.801045 |

|   |           |           |           |
|---|-----------|-----------|-----------|
| H | -2.598452 | -0.956130 | -0.518267 |
| H | 1.094515  | -0.434736 | -1.478405 |
| F | -1.879476 | -0.217015 | 1.213675  |
| F | 1.869673  | -1.503712 | 0.037700  |
| F | 2.079865  | 1.231006  | 0.292734  |

### 3\_41

|   |           |           |           |
|---|-----------|-----------|-----------|
| C | -1.335165 | -0.885058 | -0.151767 |
| C | 0.117439  | -1.382713 | -0.059625 |
| C | 1.115033  | -0.339997 | -0.555104 |
| C | 0.782189  | 1.039541  | -0.025355 |
| C | -0.572504 | 1.499447  | -0.583564 |
| C | -1.467927 | 0.335511  | -1.051526 |
| H | 0.338829  | -1.598364 | 0.991155  |
| H | 0.247519  | -2.308077 | -0.632847 |
| H | -1.194593 | 0.026461  | -2.070733 |
| H | -0.407274 | 2.191349  | -1.418778 |
| H | -1.068219 | 2.060229  | 0.216581  |
| H | -2.516460 | 0.655893  | -1.080883 |
| H | -1.995669 | -1.691798 | -0.495440 |
| H | 1.114874  | -0.283562 | -1.653726 |
| F | -1.789185 | -0.530591 | 1.131075  |
| F | 2.406275  | -0.713981 | -0.173825 |
| H | 1.586274  | 1.744597  | -0.271975 |
| F | 0.722947  | 0.978225  | 1.373672  |

### 3\_42

|   |           |           |           |
|---|-----------|-----------|-----------|
| C | -1.667462 | 0.250524  | 0.114275  |
| C | -0.752287 | 1.317482  | -0.493373 |
| C | 0.729232  | 0.949911  | -0.401986 |
| C | 0.894645  | -0.553158 | -0.496734 |
| C | 0.281685  | -1.255432 | 0.715460  |
| C | -0.984560 | -0.530391 | 1.225862  |
| H | -1.041507 | 1.460918  | -1.541564 |
| H | -0.891854 | 2.271735  | 0.028782  |
| H | -0.714297 | 0.188881  | 2.009077  |
| H | 1.042193  | -1.272596 | 1.503847  |
| H | 0.053578  | -2.292175 | 0.445855  |
| H | -1.692317 | -1.248462 | 1.656245  |
| H | -2.606723 | 0.702358  | 0.458203  |
| F | -2.026004 | -0.663232 | -0.906198 |
| H | 0.414819  | -0.881606 | -1.427601 |
| F | 2.251461  | -0.881788 | -0.595001 |
| F | 1.230486  | 1.382910  | 0.840949  |
| H | 1.325105  | 1.456330  | -1.171612 |

### 3\_43

|   |           |           |           |
|---|-----------|-----------|-----------|
| C | 1.307273  | -0.795271 | -0.104201 |
| C | 0.140292  | -0.972638 | -1.084829 |
| C | -1.171750 | -0.363561 | -0.604987 |
| C | -0.968440 | 0.938086  | 0.161041  |
| C | -0.028010 | 0.774661  | 1.361167  |
| C | 0.833845  | -0.499829 | 1.308801  |
| H | 0.424357  | -0.508326 | -2.036046 |
| H | -0.039703 | -2.038578 | -1.271571 |
| H | 0.253437  | -1.365305 | 1.651661  |
| H | -0.614842 | 0.779917  | 2.286899  |
| H | 0.615809  | 1.661674  | 1.373009  |
| H | 1.702812  | -0.392198 | 1.969538  |
| H | 1.958282  | -1.678965 | -0.123888 |

|   |           |           |           |
|---|-----------|-----------|-----------|
| F | 2.105384  | 0.284450  | -0.533767 |
| F | -1.809738 | -1.252277 | 0.285416  |
| H | -1.859722 | -0.209214 | -1.445892 |
| H | -1.939611 | 1.342123  | 0.472907  |
| F | -0.426766 | 1.847849  | -0.762601 |

### 3\_44

|   |           |           |           |
|---|-----------|-----------|-----------|
| C | -1.573173 | 0.018739  | -0.351562 |
| C | -0.658242 | 1.206622  | -0.034810 |
| C | 0.754935  | 0.765714  | 0.364909  |
| C | 1.153857  | -0.494235 | -0.379120 |
| C | 0.230843  | -1.665066 | -0.006714 |
| C | -1.167932 | -1.205246 | 0.450589  |
| H | -0.571266 | 1.869862  | -0.903420 |
| H | -1.114687 | 1.778291  | 0.781501  |
| H | -1.165652 | -0.940568 | 1.516498  |
| H | 0.724756  | -2.220890 | 0.798830  |
| H | 0.145976  | -2.340581 | -0.865908 |
| H | -1.900906 | -2.008534 | 0.311179  |
| F | 2.470389  | -0.833425 | -0.054961 |
| H | 1.140861  | -0.284532 | -1.458191 |
| H | 0.838035  | 0.582670  | 1.444849  |
| F | 1.649297  | 1.794717  | 0.061391  |
| F | -2.896340 | 0.374887  | -0.057593 |
| H | -1.548951 | -0.220501 | -1.424626 |

### 3\_45

|   |           |           |           |
|---|-----------|-----------|-----------|
| C | -1.350939 | -0.200396 | 0.350248  |
| C | -0.254495 | -1.234225 | 0.063024  |
| C | 0.974288  | -0.580836 | -0.574247 |
| C | 1.188819  | 0.818626  | -0.036039 |
| C | 0.041028  | 1.723798  | -0.489546 |
| C | -1.294511 | 0.960914  | -0.632728 |
| H | 0.061743  | -1.729605 | 0.986978  |
| H | -0.662871 | -1.994116 | -0.613584 |
| H | -1.404249 | 0.555596  | -1.648141 |
| H | 0.308939  | 2.190061  | -1.445765 |
| H | -0.046309 | 2.526234  | 0.252494  |
| H | -2.141080 | 1.634650  | -0.456431 |
| H | 0.858838  | -0.499602 | -1.664604 |
| F | 2.101493  | -1.374222 | -0.347323 |
| F | -2.602306 | -0.828723 | 0.250883  |
| H | -1.266490 | 0.174852  | 1.377271  |
| H | 2.167499  | 1.209595  | -0.340946 |
| F | 1.200683  | 0.759062  | 1.370713  |

### 3\_46

|   |           |           |           |
|---|-----------|-----------|-----------|
| C | 1.495755  | 0.223600  | -0.405489 |
| C | 0.797806  | -1.138188 | -0.503930 |
| C | -0.693784 | -1.050815 | -0.169628 |
| C | -1.222669 | 0.312600  | -0.568503 |
| C | -0.597739 | 1.423427  | 0.280056  |
| C | 0.862965  | 1.098541  | 0.665400  |
| H | 0.932499  | -1.563309 | -1.506039 |
| H | 1.265562  | -1.818571 | 0.217531  |
| H | 0.893186  | 0.554334  | 1.616431  |
| H | -1.209006 | 1.531910  | 1.182401  |
| H | -0.655158 | 2.366060  | -0.277317 |
| H | 1.448586  | 2.018202  | 0.779708  |
| F | 2.850667  | 0.010863  | -0.113880 |

|   |           |           |           |
|---|-----------|-----------|-----------|
| H | 1.470675  | 0.745815  | -1.373589 |
| H | -0.995215 | 0.451856  | -1.636057 |
| F | -2.614197 | 0.352688  | -0.449373 |
| F | -0.873742 | -1.213815 | 1.214845  |
| H | -1.269684 | -1.848912 | -0.654822 |

### 3\_47

|   |           |           |           |
|---|-----------|-----------|-----------|
| C | -1.301139 | -0.281278 | -0.286070 |
| C | -0.541362 | 0.940536  | -0.809323 |
| C | 0.912715  | 0.979506  | -0.336040 |
| C | 1.454797  | -0.419171 | -0.063947 |
| C | 0.659835  | -1.135619 | 1.026894  |
| C | -0.814516 | -0.685572 | 1.095773  |
| H | -0.578016 | 0.973245  | -1.903826 |
| H | -1.035734 | 1.842046  | -0.426255 |
| H | -0.919191 | 0.177800  | 1.764125  |
| H | 1.146580  | -0.961448 | 1.993120  |
| H | 0.731276  | -2.209341 | 0.811716  |
| H | -1.444938 | -1.494308 | 1.483893  |
| F | -2.668399 | 0.035325  | -0.231309 |
| H | -1.203054 | -1.125777 | -0.979920 |
| F | 1.002046  | 1.673689  | 0.886226  |
| H | 1.548038  | 1.515203  | -1.051969 |
| H | 2.524080  | -0.387472 | 0.178740  |
| F | 1.334017  | -1.122387 | -1.280845 |

### 3\_48

|   |           |           |           |
|---|-----------|-----------|-----------|
| C | -0.341670 | 1.463671  | 0.242035  |
| C | 1.151531  | 1.116224  | 0.220017  |
| C | 1.389087  | -0.391276 | 0.321493  |
| C | 0.281377  | -1.172188 | -0.368116 |
| C | -1.015395 | -0.985656 | 0.421443  |
| C | -1.155186 | 0.428473  | 1.004684  |
| H | 1.571430  | 1.468643  | -0.729788 |
| H | 1.671070  | 1.639061  | 1.032679  |
| H | -0.806567 | 0.429846  | 2.047297  |
| H | 0.134029  | -0.782749 | -1.381836 |
| H | 0.548204  | -2.233341 | -0.430570 |
| H | -1.072451 | -1.717841 | 1.238863  |
| H | -2.217286 | 0.699951  | 1.007464  |
| H | -0.498549 | 2.467552  | 0.658429  |
| H | 1.460332  | -0.703308 | 1.374710  |
| F | -0.819713 | 1.509744  | -1.082174 |
| F | 2.626446  | -0.699786 | -0.259257 |
| F | -2.101031 | -1.256992 | -0.421523 |

### 3\_49

|   |           |           |           |
|---|-----------|-----------|-----------|
| C | 0.219547  | 1.533678  | -0.405668 |
| C | -1.165121 | 0.900959  | -0.581950 |
| C | -1.149139 | -0.600947 | -0.292886 |
| C | -0.168175 | -0.929668 | 0.817980  |
| C | 1.260810  | -0.634413 | 0.359340  |
| C | 1.340716  | 0.532713  | -0.634859 |
| H | -1.853886 | 1.382450  | 0.122837  |
| H | -1.535874 | 1.089924  | -1.597022 |
| H | 1.234103  | 0.122066  | -1.648006 |
| H | -0.403320 | -0.319126 | 1.698194  |
| H | -0.240698 | -1.987880 | 1.094475  |
| H | 2.317043  | 1.026275  | -0.572664 |
| H | 0.332298  | 2.409406  | -1.057157 |

|   |           |           |           |
|---|-----------|-----------|-----------|
| H | -0.888157 | -1.172049 | -1.194726 |
| F | 0.339998  | 2.015336  | 0.918825  |
| F | -2.441077 | -1.006694 | 0.071204  |
| H | 1.901853  | -0.453239 | 1.229353  |
| F | 1.779391  | -1.776615 | -0.284143 |

### 3\_50

|   |           |           |           |
|---|-----------|-----------|-----------|
| C | -0.148642 | 1.421966  | 0.423570  |
| C | 1.240601  | 1.151753  | -0.157088 |
| C | 1.450065  | -0.313084 | -0.543701 |
| C | 0.146425  | -0.999489 | -0.915582 |
| C | -0.799673 | -1.032258 | 0.287584  |
| C | -0.695403 | 0.217150  | 1.171146  |
| H | 1.372290  | 1.792345  | -1.037752 |
| H | 2.011144  | 1.424480  | 0.574590  |
| H | -0.016453 | 0.009586  | 2.008159  |
| H | -0.334531 | -0.421706 | -1.713847 |
| H | 0.334537  | -2.014993 | -1.282417 |
| H | -1.688321 | 0.438762  | 1.579449  |
| H | -0.132561 | 2.310742  | 1.068271  |
| F | -1.026451 | 1.725738  | -0.639103 |
| F | -2.113805 | -1.160716 | -0.191963 |
| H | -0.609016 | -1.923120 | 0.897543  |
| H | 2.192976  | -0.400533 | -1.346326 |
| F | 1.996889  | -0.997443 | 0.570706  |

### 3\_51

|   |           |           |           |
|---|-----------|-----------|-----------|
| C | 0.852188  | -0.983598 | -0.310075 |
| C | -0.638759 | -1.313506 | -0.170650 |
| C | -1.428107 | -0.103105 | 0.338589  |
| C | -0.832351 | 1.202631  | -0.169099 |
| C | 0.578267  | 1.396735  | 0.402783  |
| C | 1.277105  | 0.068530  | 0.701101  |
| H | -1.060485 | -1.615437 | -1.136871 |
| H | -0.740604 | -2.156873 | 0.522979  |
| H | 1.014077  | -0.272664 | 1.711842  |
| H | -0.757644 | 1.159133  | -1.263464 |
| H | -1.481998 | 2.044859  | 0.093655  |
| H | 2.361853  | 0.222302  | 0.666543  |
| H | 0.555167  | 2.015806  | 1.308508  |
| H | 1.084395  | -0.630230 | -1.323277 |
| F | 1.599591  | -2.153626 | -0.116660 |
| F | -2.756969 | -0.206510 | -0.093014 |
| H | -1.463875 | -0.095172 | 1.437183  |
| F | 1.339495  | 2.107042  | -0.542881 |

### 4\_1

|   |           |           |           |
|---|-----------|-----------|-----------|
| C | -0.629061 | -1.273132 | 0.433375  |
| C | 0.629061  | -1.273132 | -0.433375 |
| C | 0.768196  | 0.000000  | -1.254627 |
| C | 0.629061  | 1.273132  | -0.433375 |
| C | -0.629061 | 1.273132  | 0.433375  |
| C | -0.768196 | 0.000000  | 1.254627  |
| H | 1.732000  | 0.000000  | -1.777602 |
| H | 0.612953  | -2.150945 | -1.092476 |
| H | -0.612953 | -2.150945 | 1.092476  |
| H | 0.612953  | 2.150945  | -1.092476 |
| H | -0.612953 | 2.150945  | 1.092476  |
| H | 0.031563  | 0.000000  | 2.006726  |

|   |           |           |           |
|---|-----------|-----------|-----------|
| H | -1.732000 | 0.000000  | 1.777602  |
| H | -0.031563 | 0.000000  | -2.006726 |
| F | -1.721264 | -1.419716 | -0.432788 |
| F | 1.721264  | -1.419716 | 0.432788  |
| F | 1.721264  | 1.419716  | 0.432788  |
| F | -1.721264 | 1.419716  | -0.432788 |

#### 4\_2

|   |           |           |           |
|---|-----------|-----------|-----------|
| C | 1.502777  | -0.496800 | 0.148928  |
| C | 1.208565  | 0.891403  | -0.418894 |
| C | -0.226118 | 1.029378  | -0.902891 |
| C | -1.186400 | 0.670751  | 0.221172  |
| C | -0.973693 | -0.758251 | 0.693249  |
| C | 0.463876  | -0.946277 | 1.169987  |
| H | -0.408581 | 2.055814  | -1.241037 |
| H | 1.923589  | 1.120275  | -1.218623 |
| H | 2.501260  | -0.493114 | 0.605410  |
| H | 0.610828  | -0.353253 | 2.082559  |
| H | 0.634464  | -2.000159 | 1.419643  |
| H | -0.381888 | 0.345011  | -1.745412 |
| F | 1.539274  | -1.381602 | -0.934234 |
| F | 1.436123  | 1.807793  | 0.626804  |
| H | -1.687140 | -1.001111 | 1.492266  |
| H | -1.035341 | 1.340405  | 1.078638  |
| F | -2.503368 | 0.834154  | -0.209845 |
| F | -1.237721 | -1.633132 | -0.365252 |

#### 4\_3

|   |           |           |           |
|---|-----------|-----------|-----------|
| C | 0.614513  | 0.453717  | -1.472830 |
| C | -0.614513 | -0.453717 | -1.472830 |
| C | -0.699664 | -1.288640 | -0.207018 |
| C | -0.629686 | -0.422389 | 1.046307  |
| C | 0.629686  | 0.422389  | 1.046307  |
| C | 0.699664  | 1.288640  | -0.207018 |
| H | -1.629286 | -1.869330 | -0.204119 |
| H | -0.607729 | -1.091097 | -2.365753 |
| H | 0.607729  | 1.091097  | -2.365753 |
| H | -0.143203 | 1.991821  | -0.200717 |
| H | 1.629286  | 1.869330  | -0.204119 |
| H | 0.143203  | -1.991821 | -0.200717 |
| F | 1.737547  | -0.387169 | -1.559089 |
| F | -1.737547 | 0.387169  | -1.559089 |
| H | -1.505302 | 0.234882  | 1.127442  |
| F | -0.629686 | -1.261028 | 2.164021  |
| F | 0.629686  | 1.261028  | 2.164021  |
| H | 1.505302  | -0.234882 | 1.127442  |

#### 4\_4

|   |           |           |           |
|---|-----------|-----------|-----------|
| C | -1.096212 | -0.593052 | -0.776676 |
| C | -1.100162 | -0.583651 | 0.744074  |
| C | 0.314251  | -0.601254 | 1.311729  |
| C | 1.096212  | 0.593052  | 0.776676  |
| C | 1.100162  | 0.583651  | -0.744074 |
| C | -0.314251 | 0.601254  | -1.311729 |
| H | 0.275617  | -0.560641 | 2.405952  |
| H | -2.124649 | -0.615199 | -1.158582 |

|   |           |           |           |
|---|-----------|-----------|-----------|
| H | -0.810159 | 1.533296  | -1.013990 |
| H | -0.275617 | 0.560641  | -2.405952 |
| H | 0.810159  | -1.533296 | 1.013990  |
| F | -0.470849 | -1.771330 | -1.220084 |
| H | -1.630200 | 0.318728  | 1.076198  |
| F | -1.809516 | -1.687380 | 1.219345  |
| F | 0.470849  | 1.771330  | 1.220084  |
| H | 2.124649  | 0.615199  | 1.158582  |
| H | 1.630200  | -0.318728 | -1.076198 |
| F | 1.809516  | 1.687380  | -1.219345 |

4\_5

|   |           |           |           |
|---|-----------|-----------|-----------|
| C | 0.767613  | -0.395035 | 1.276273  |
| C | -0.753430 | -0.400572 | 1.229400  |
| C | -1.277994 | 0.327263  | 0.000000  |
| C | -0.753430 | -0.400572 | -1.229400 |
| C | 0.767613  | -0.395035 | -1.276273 |
| C | 1.344644  | -1.006486 | 0.000000  |
| H | -2.373785 | 0.320122  | 0.000000  |
| H | 1.114613  | -0.945709 | 2.161165  |
| H | 1.137570  | -2.085960 | 0.000000  |
| H | 2.432904  | -0.875609 | 0.000000  |
| H | -0.922253 | 1.363377  | 0.000000  |
| F | 1.214128  | 0.919777  | 1.412793  |
| H | -1.083024 | -1.451587 | 1.215283  |
| F | -1.264557 | 0.174405  | 2.390294  |
| F | -1.264557 | 0.174405  | -2.390294 |
| H | -1.083024 | -1.451587 | -1.215283 |
| H | 1.114613  | -0.945709 | -2.161165 |
| F | 1.214128  | 0.919777  | -1.412793 |

4\_6

|   |           |           |           |
|---|-----------|-----------|-----------|
| C | -1.204759 | -1.015170 | -0.159998 |
| C | -1.382879 | 0.437478  | -0.572841 |
| C | -0.365003 | 1.334250  | 0.115824  |
| C | 1.047840  | 0.873103  | -0.225129 |
| C | 1.254809  | -0.582645 | 0.153315  |
| C | 0.205039  | -1.477807 | -0.500974 |
| H | -0.501738 | 2.373024  | -0.204801 |
| H | -1.967286 | -1.643340 | -0.637954 |
| H | 0.343388  | -1.452438 | -1.590644 |
| H | 0.349345  | -2.511713 | -0.168278 |
| H | -0.514739 | 1.281036  | 1.200711  |
| F | -1.391078 | -1.121127 | 1.225747  |
| H | -1.267689 | 0.490512  | -1.666172 |
| F | -2.674476 | 0.864231  | -0.271355 |
| H | 1.230702  | -0.677042 | 1.246282  |
| F | 2.517706  | -0.996956 | -0.278596 |
| F | 1.963510  | 1.668680  | 0.464045  |
| H | 1.256776  | 0.991256  | -1.298910 |

4\_7

|   |           |           |           |
|---|-----------|-----------|-----------|
| C | -0.629456 | 0.423603  | 1.260262  |
| C | 0.629456  | -0.423603 | 1.260262  |
| C | 0.698085  | -1.277072 | 0.000000  |
| C | 0.629456  | -0.423603 | -1.260262 |
| C | -0.629456 | 0.423603  | -1.260262 |
| C | -0.698085 | 1.277072  | 0.000000  |

|   |           |           |           |
|---|-----------|-----------|-----------|
| H | 0.145496  | 1.980652  | 0.000000  |
| H | -1.623576 | 1.863550  | 0.000000  |
| F | -0.629456 | 1.264756  | 2.373163  |
| H | -1.503068 | -0.238217 | 1.348320  |
| H | -0.145496 | -1.980652 | 0.000000  |
| H | 1.623576  | -1.863550 | 0.000000  |
| F | 0.629456  | -1.264756 | 2.373163  |
| H | 1.503068  | 0.238217  | 1.348320  |
| F | -0.629456 | 1.264756  | -2.373163 |
| H | -1.503068 | -0.238217 | -1.348320 |
| H | 1.503068  | 0.238217  | -1.348320 |
| F | 0.629456  | -1.264756 | -2.373163 |

#### 4\_8

|   |           |           |           |
|---|-----------|-----------|-----------|
| C | -0.270837 | 0.514962  | 1.285221  |
| C | -0.836726 | 1.117237  | 0.000000  |
| C | -0.270837 | 0.514962  | -1.285221 |
| C | -0.270837 | -1.006923 | -1.265711 |
| C | 0.329994  | -1.607990 | 0.000000  |
| C | -0.270837 | -1.006923 | 1.265711  |
| H | -0.877086 | 0.877929  | -2.126649 |
| H | -0.691016 | 2.204385  | 0.000000  |
| H | -0.877086 | 0.877929  | 2.126649  |
| H | -1.315607 | -1.339175 | -1.335926 |
| H | 0.264374  | -1.380586 | -2.146788 |
| H | 0.169502  | -2.695440 | 0.000000  |
| H | -1.315607 | -1.339175 | 1.335926  |
| H | 0.264374  | -1.380586 | 2.146788  |
| F | 1.022604  | 1.006807  | 1.459341  |
| F | -2.215466 | 0.848501  | 0.000000  |
| F | 1.022604  | 1.006807  | -1.459341 |
| F | 1.716771  | -1.415141 | 0.000000  |

#### 4\_9

|   |           |           |           |
|---|-----------|-----------|-----------|
| C | 0.670857  | -0.081546 | 1.284942  |
| C | 1.436270  | 0.237111  | 0.000000  |
| C | 0.670857  | -0.081546 | -1.284942 |
| C | -0.761886 | 0.427928  | -1.253782 |
| C | -1.478812 | -0.050944 | 0.000000  |
| C | -0.761886 | 0.427928  | 1.253782  |
| H | 1.220093  | 0.350139  | -2.131788 |
| H | 2.398306  | -0.289742 | 0.000000  |
| H | 1.220093  | 0.350139  | 2.131788  |
| H | -0.741542 | 1.525823  | -1.255236 |
| H | -1.289362 | 0.089601  | -2.153440 |
| H | -0.741542 | 1.525823  | 1.255236  |
| H | -1.289362 | 0.089601  | 2.153440  |
| F | 0.670857  | -1.472937 | 1.446645  |
| F | 1.678201  | 1.617788  | 0.000000  |
| F | 0.670857  | -1.472937 | -1.446645 |
| F | -2.782879 | 0.464688  | 0.000000  |
| H | -1.562404 | -1.144400 | 0.000000  |

#### 4\_10

|   |           |           |           |
|---|-----------|-----------|-----------|
| C | 0.498451  | 1.394565  | -0.015367 |
| C | -0.939675 | 0.891398  | -0.145895 |
| C | -0.952487 | -0.576202 | -0.531523 |
| C | -0.246858 | -1.426111 | 0.513080  |
| C | 1.200148  | -0.968870 | 0.666100  |

|   |           |           |           |
|---|-----------|-----------|-----------|
| C | 1.317081  | 0.528556  | 0.933701  |
| H | -1.504013 | 1.490399  | -0.871141 |
| H | 0.486916  | 2.434519  | 0.335773  |
| H | -0.764292 | -1.319031 | 1.474408  |
| H | -0.272466 | -2.480577 | 0.215962  |
| H | 0.955118  | 0.720928  | 1.952440  |
| H | 2.369622  | 0.831794  | 0.882988  |
| F | 1.059672  | 1.391348  | -1.298017 |
| F | -1.541307 | 1.058693  | 1.108667  |
| H | -0.456477 | -0.674871 | -1.504866 |
| F | -2.274272 | -1.003179 | -0.679843 |
| F | 1.892776  | -1.284096 | -0.517265 |
| H | 1.693815  | -1.528063 | 1.471978  |

#### 4\_11

|   |           |           |           |
|---|-----------|-----------|-----------|
| C | -0.041730 | 1.525758  | 0.129710  |
| C | -1.236885 | 0.573834  | 0.207437  |
| C | -0.961534 | -0.685921 | -0.596530 |
| C | 0.295654  | -1.393029 | -0.112639 |
| C | 1.477175  | -0.439863 | -0.249449 |
| C | 1.255197  | 0.844521  | 0.539575  |
| H | -2.153228 | 1.063798  | -0.144304 |
| H | -0.235230 | 2.407468  | 0.752591  |
| H | 0.174266  | -1.678133 | 0.939282  |
| H | 0.465744  | -2.297471 | -0.707948 |
| H | 1.193317  | 0.597777  | 1.607347  |
| H | 2.094011  | 1.534456  | 0.390247  |
| F | 0.052689  | 1.960636  | -1.204667 |
| F | -1.410905 | 0.249467  | 1.556076  |
| F | 2.633980  | -1.068477 | 0.227262  |
| H | 1.654348  | -0.206043 | -1.308202 |
| H | -0.854489 | -0.389810 | -1.649265 |
| F | -2.060875 | -1.539831 | -0.510712 |

#### 4\_12

|   |           |           |           |
|---|-----------|-----------|-----------|
| C | -0.391114 | 0.373101  | 1.276081  |
| C | -1.035920 | 0.893696  | 0.000000  |
| C | -0.391114 | 0.373101  | -1.276081 |
| C | -0.391114 | -1.153711 | -1.272643 |
| C | 0.190706  | -1.765217 | 0.000000  |
| C | -0.391114 | -1.153711 | 1.272643  |
| H | -0.955793 | 0.754698  | 2.138588  |
| H | -1.429651 | -1.500238 | -1.373949 |
| H | 0.169548  | -1.517622 | -2.141736 |
| H | -1.429651 | -1.500238 | 1.373949  |
| H | 0.169548  | -1.517622 | 2.141736  |
| F | 0.907247  | 0.854254  | 1.400089  |
| F | 1.579963  | -1.609769 | 0.000000  |
| H | 0.000034  | -2.847953 | 0.000000  |
| H | -2.078833 | 0.538786  | 0.000000  |
| F | -1.064610 | 2.282587  | 0.000000  |
| F | 0.907247  | 0.854254  | -1.400089 |
| H | -0.955793 | 0.754698  | -2.138588 |

#### 4\_13

|   |           |          |          |
|---|-----------|----------|----------|
| C | -0.271902 | 0.514982 | 1.278013 |
| C | -0.903695 | 1.051468 | 0.000000 |

|   |           |           |           |
|---|-----------|-----------|-----------|
| C | -0.271902 | 0.514982  | -1.278013 |
| C | -0.271902 | -1.009994 | -1.260897 |
| C | 0.407246  | -1.530734 | 0.000000  |
| C | -0.271902 | -1.009994 | 1.260897  |
| H | -0.825486 | 0.905513  | 2.142279  |
| H | -1.308059 | -1.375482 | -1.284361 |
| H | 0.243118  | -1.385093 | -2.152802 |
| H | -1.308059 | -1.375482 | 1.284361  |
| H | 0.243118  | -1.385093 | 2.152802  |
| F | 1.042325  | 0.970988  | 1.397717  |
| H | -1.954448 | 0.722233  | 0.000000  |
| F | -0.894789 | 2.440370  | 0.000000  |
| F | 1.042325  | 0.970988  | -1.397717 |
| H | -0.825486 | 0.905513  | -2.142279 |
| F | 0.340306  | -2.931448 | 0.000000  |
| H | 1.468152  | -1.254464 | 0.000000  |

#### 4\_14

|   |           |           |           |
|---|-----------|-----------|-----------|
| C | -0.133307 | -1.365302 | 0.405791  |
| C | 1.074881  | -0.438997 | 0.456037  |
| C | 0.798137  | 0.854205  | -0.287810 |
| C | -0.399352 | 1.565175  | 0.332106  |
| C | -1.641972 | 0.684438  | 0.351039  |
| C | -1.374533 | -0.684698 | 0.970959  |
| H | 0.093797  | -2.288895 | 0.955085  |
| H | -0.145263 | 1.838083  | 1.366087  |
| H | -0.606910 | 2.489119  | -0.219761 |
| H | -1.237637 | -0.550295 | 2.053321  |
| H | -2.244602 | -1.334221 | 0.819184  |
| F | -0.361661 | -1.729047 | -0.924231 |
| H | 1.306949  | -0.205841 | 1.506085  |
| F | 2.177564  | -1.087959 | -0.086158 |
| H | 0.639561  | 0.642893  | -1.351344 |
| F | 1.914105  | 1.688950  | -0.178490 |
| F | -2.096566 | 0.520630  | -0.966337 |
| H | -2.449998 | 1.187070  | 0.899556  |

#### 4\_15

|   |           |           |           |
|---|-----------|-----------|-----------|
| C | -0.255115 | -1.398528 | -0.323162 |
| C | -1.162380 | -0.191501 | -0.522047 |
| C | -0.722407 | 0.972694  | 0.348648  |
| C | 0.733051  | 1.328206  | 0.066342  |
| C | 1.637385  | 0.117479  | 0.257613  |
| C | 1.197122  | -1.050579 | -0.616971 |
| H | -0.611201 | -2.231732 | -0.941884 |
| H | 0.818554  | 1.673389  | -0.973129 |
| H | 1.046364  | 2.146771  | 0.724495  |
| H | 1.300524  | -0.765739 | -1.672947 |
| H | 1.831014  | -1.925484 | -0.432473 |
| F | -0.351908 | -1.810005 | 1.016852  |
| H | -1.125875 | 0.115438  | -1.577429 |
| F | -2.474110 | -0.544647 | -0.226681 |
| F | 2.947822  | 0.472751  | -0.085669 |
| H | 1.652807  | -0.188883 | 1.311411  |
| H | -0.881747 | 0.714563  | 1.403142  |
| F | -1.521402 | 2.081350  | 0.061752  |

#### 4\_16

|   |           |           |           |
|---|-----------|-----------|-----------|
| C | -1.234693 | -0.281646 | -0.471147 |
| C | 0.000000  | -1.155529 | -0.311264 |

|   |           |           |           |
|---|-----------|-----------|-----------|
| C | 1.234693  | -0.281646 | -0.471147 |
| C | 1.271713  | 0.804491  | 0.595365  |
| C | 0.000000  | 1.644277  | 0.541982  |
| C | -1.271713 | 0.804491  | 0.595365  |
| H | 0.000000  | -1.982716 | -1.032457 |
| H | 1.350738  | 0.331483  | 1.581723  |
| H | 2.145994  | 1.447009  | 0.442100  |
| H | -1.350738 | 0.331483  | 1.581723  |
| H | -2.145994 | 1.447009  | 0.442100  |
| F | 0.000000  | -1.719150 | 0.968456  |
| H | 1.218697  | 0.166038  | -1.473750 |
| F | 2.380782  | -1.071934 | -0.384310 |
| F | 0.000000  | 2.362496  | -0.676231 |
| H | 0.000000  | 2.391728  | 1.344929  |
| H | -1.218697 | 0.166038  | -1.473750 |
| F | -2.380782 | -1.071934 | -0.384310 |

#### 4\_17

|   |           |           |           |
|---|-----------|-----------|-----------|
| C | 0.714162  | 0.229970  | 1.235231  |
| C | 0.661904  | 1.118406  | 0.000000  |
| C | 0.714162  | 0.229970  | -1.235231 |
| C | -0.461277 | -0.737171 | -1.265116 |
| C | -0.445400 | -1.588960 | 0.000000  |
| C | -0.461277 | -0.737171 | 1.265116  |
| H | 1.483940  | 1.845705  | 0.000000  |
| H | -1.396460 | -0.166634 | -1.308107 |
| H | -0.394193 | -1.376371 | -2.152848 |
| H | -1.396460 | -0.166634 | 1.308107  |
| H | -0.394193 | -1.376371 | 2.152848  |
| F | -0.534553 | 1.835068  | 0.000000  |
| F | -1.561806 | -2.430446 | 0.000000  |
| H | 0.441491  | -2.241618 | 0.000000  |
| H | 1.667276  | -0.320420 | -1.221638 |
| F | 0.714162  | 1.021716  | -2.381080 |
| F | 0.714162  | 1.021716  | 2.381080  |
| H | 1.667276  | -0.320420 | 1.221638  |

#### 4\_18

|   |           |           |           |
|---|-----------|-----------|-----------|
| C | 0.296772  | 1.253888  | 0.151651  |
| C | 1.097906  | 0.000000  | -0.160314 |
| C | 0.296772  | -1.253888 | 0.151651  |
| C | -1.046028 | -1.260154 | -0.566971 |
| C | -1.840563 | 0.000000  | -0.257158 |
| C | -1.046028 | 1.260154  | -0.566971 |
| H | -0.871016 | -1.309749 | -1.650385 |
| H | -1.614403 | -2.149820 | -0.272748 |
| H | -0.871016 | 1.309749  | -1.650385 |
| H | -1.614403 | 2.149820  | -0.272748 |
| H | 1.396107  | 0.000000  | -1.218391 |
| F | 2.259970  | 0.000000  | 0.607227  |
| H | 0.162479  | -1.330734 | 1.238024  |
| F | 1.031447  | -2.369230 | -0.257998 |
| F | -2.157285 | 0.000000  | 1.117510  |
| H | -2.793410 | 0.000000  | -0.801372 |
| H | 0.162479  | 1.330734  | 1.238024  |
| F | 1.031447  | 2.369230  | -0.257998 |

#### 4\_19

|   |           |           |          |
|---|-----------|-----------|----------|
| C | -0.452480 | -1.254849 | 0.257147 |
|---|-----------|-----------|----------|

|   |           |           |           |
|---|-----------|-----------|-----------|
| C | -1.174989 | 0.000000  | -0.209353 |
| C | -0.452480 | 1.254849  | 0.257147  |
| C | 1.012901  | 1.254156  | -0.155520 |
| C | 1.699773  | 0.000000  | 0.365155  |
| C | 1.012901  | -1.254156 | -0.155520 |
| H | 1.081188  | 1.269673  | -1.251371 |
| H | 1.504152  | 2.153544  | 0.233290  |
| H | 1.081188  | -1.269673 | -1.251371 |
| H | 1.504152  | -2.153544 | 0.233290  |
| H | -1.255267 | 0.000000  | -1.305141 |
| F | -2.465838 | 0.000000  | 0.313410  |
| F | 3.034512  | 0.000000  | -0.050647 |
| H | 1.709293  | 0.000000  | 1.465609  |
| H | -0.556635 | 1.334016  | 1.348983  |
| F | -1.083514 | 2.368702  | -0.296748 |
| F | -1.083514 | -2.368702 | -0.296748 |
| H | -0.556635 | -1.334016 | 1.348983  |

#### 4\_20

|   |           |           |           |
|---|-----------|-----------|-----------|
| C | 0.249522  | 1.462378  | 0.311869  |
| C | -0.126731 | 0.754574  | -0.990036 |
| C | 0.126731  | -0.754574 | -0.990036 |
| C | -0.249522 | -1.462378 | 0.311869  |
| C | 0.249522  | -0.723984 | 1.541300  |
| C | -0.249522 | 0.723984  | 1.541300  |
| H | -0.428868 | -1.201602 | -1.824240 |
| H | 0.428868  | 1.201602  | -1.824240 |
| H | -0.140646 | 2.487993  | 0.273450  |
| H | 0.140646  | -2.487993 | 0.273450  |
| H | -0.087381 | -1.255422 | 2.439302  |
| H | 1.346821  | -0.742986 | 1.526171  |
| H | -1.346821 | 0.742986  | 1.526171  |
| H | 0.087381  | 1.255422  | 2.439302  |
| F | 1.649448  | 1.544920  | 0.353587  |
| F | -1.492571 | 0.963503  | -1.197306 |
| F | 1.492571  | -0.963503 | -1.197306 |
| F | -1.649448 | -1.544920 | 0.353587  |

#### 4\_21

|   |           |           |           |
|---|-----------|-----------|-----------|
| C | 1.577906  | 0.331987  | -0.068111 |
| C | 0.874740  | -1.027513 | -0.059592 |
| C | -0.610795 | -0.955213 | 0.300843  |
| C | -1.312799 | 0.122435  | -0.509896 |
| C | -0.660077 | 1.479658  | -0.312777 |
| C | 0.789097  | 1.399321  | -0.810828 |
| H | -1.081967 | -1.931953 | 0.129753  |
| H | 1.388466  | -1.707640 | 0.630612  |
| H | 2.573006  | 0.199526  | -0.513621 |
| H | -1.219847 | 2.238566  | -0.871727 |
| H | -0.685595 | 1.743110  | 0.751069  |
| H | 0.807448  | 1.143573  | -1.879600 |
| H | 1.301659  | 2.361256  | -0.690553 |
| F | 1.760208  | 0.724136  | 1.262807  |
| F | 0.966186  | -1.549760 | -1.357597 |
| F | -0.707624 | -0.664103 | 1.659824  |
| H | -1.264941 | -0.170008 | -1.568745 |
| F | -2.659511 | 0.158563  | -0.145592 |

#### 4\_22

|   |           |           |          |
|---|-----------|-----------|----------|
| C | -1.513154 | -0.465159 | 0.310201 |
|---|-----------|-----------|----------|

|   |           |           |           |
|---|-----------|-----------|-----------|
| C | -0.158174 | -1.170774 | 0.215662  |
| C | 0.748083  | -0.440221 | -0.764238 |
| C | 0.910573  | 1.043059  | -0.469186 |
| C | -0.460277 | 1.708994  | -0.412279 |
| C | -1.360945 | 1.015043  | 0.616694  |
| H | -0.287710 | -2.210503 | -0.111741 |
| H | -2.133416 | -0.970099 | 1.061266  |
| H | -0.330127 | 2.767189  | -0.156951 |
| H | -0.919147 | 1.657895  | -1.408408 |
| H | -0.921064 | 1.105463  | 1.617869  |
| H | -2.353959 | 1.479929  | 0.637300  |
| F | -2.146226 | -0.625904 | -0.937350 |
| F | 0.390558  | -1.192352 | 1.494873  |
| F | 1.986125  | -1.070406 | -0.825847 |
| H | 0.276290  | -0.521332 | -1.753841 |
| H | 1.550034  | 1.494117  | -1.240060 |
| F | 1.560929  | 1.227739  | 0.754262  |

4\_23

|   |           |           |           |
|---|-----------|-----------|-----------|
| C | 1.700690  | 0.079490  | -0.054963 |
| C | 0.599682  | 1.138865  | -0.052423 |
| C | -0.727349 | 0.555355  | -0.515132 |
| C | -1.132411 | -0.634088 | 0.337159  |
| C | -0.045707 | -1.702007 | 0.298756  |
| C | 1.299687  | -1.134935 | 0.766433  |
| H | 0.870874  | 1.998497  | -0.677580 |
| H | 2.635540  | 0.521066  | 0.312586  |
| H | -0.349887 | -2.546000 | 0.928841  |
| H | 0.041839  | -2.068687 | -0.732085 |
| H | 1.239948  | -0.820007 | 1.816687  |
| H | 2.086565  | -1.894712 | 0.688823  |
| F | 1.906395  | -0.297666 | -1.392680 |
| F | 0.476142  | 1.590131  | 1.267235  |
| H | -1.334806 | -0.298012 | 1.362379  |
| F | -2.319032 | -1.168378 | -0.171976 |
| F | -1.699947 | 1.549177  | -0.460195 |
| H | -0.629652 | 0.232391  | -1.560076 |

4\_24

|   |           |           |           |
|---|-----------|-----------|-----------|
| C | 1.321713  | 0.849106  | -0.208441 |
| C | 0.928944  | -0.521851 | -0.745862 |
| C | -0.388862 | -1.040599 | -0.184264 |
| C | -1.475965 | -0.011696 | -0.472719 |
| C | -1.137185 | 1.331465  | 0.153233  |
| C | 0.186204  | 1.844048  | -0.432869 |
| H | 2.244243  | 1.175826  | -0.707567 |
| H | -1.947803 | 2.041383  | -0.048321 |
| H | -1.046943 | 1.205245  | 1.238372  |
| H | 0.082393  | 2.016560  | -1.514323 |
| H | 0.465808  | 2.799148  | 0.026589  |
| F | 1.601809  | 0.773917  | 1.155555  |
| H | -0.636839 | -2.008691 | -0.640092 |
| H | 0.804722  | -0.415948 | -1.834766 |
| F | -0.292540 | -1.240661 | 1.186690  |
| F | 1.941396  | -1.446077 | -0.525770 |
| F | -2.695365 | -0.488095 | 0.004684  |
| H | -1.572372 | 0.091881  | -1.564786 |

4\_25

|   |           |          |           |
|---|-----------|----------|-----------|
| C | -0.289214 | 1.433698 | -0.483203 |
|---|-----------|----------|-----------|

|   |           |           |           |
|---|-----------|-----------|-----------|
| C | 0.214335  | 0.728929  | 0.769466  |
| C | -0.214335 | -0.728929 | 0.769466  |
| C | 0.289214  | -1.433698 | -0.483203 |
| C | -0.209162 | -0.738207 | -1.741778 |
| C | 0.209162  | 0.738207  | -1.741778 |
| H | -0.002490 | 2.492639  | -0.450893 |
| H | 0.199885  | -1.253308 | -2.618804 |
| H | -1.303023 | -0.818055 | -1.781954 |
| H | 1.303023  | 0.818055  | -1.781954 |
| H | -0.199885 | 1.253308  | -2.618804 |
| F | -1.695050 | 1.392414  | -0.478711 |
| H | 1.309563  | 0.787759  | 0.806524  |
| F | -0.289214 | 1.367035  | 1.898513  |
| H | -1.309563 | -0.787759 | 0.806524  |
| F | 0.289214  | -1.367035 | 1.898513  |
| H | 0.002490  | -2.492639 | -0.450893 |
| F | 1.695050  | -1.392414 | -0.478711 |

4\_26

|   |           |           |           |
|---|-----------|-----------|-----------|
| C | -1.520287 | -0.603263 | -0.235712 |
| C | -0.848823 | 0.740602  | -0.469200 |
| C | 0.515533  | 0.816715  | 0.199694  |
| C | 1.399650  | -0.337707 | -0.248522 |
| C | 0.730864  | -1.686422 | -0.027188 |
| C | -0.630256 | -1.734802 | -0.730652 |
| H | -2.507744 | -0.609421 | -0.715107 |
| H | 1.391354  | -2.477441 | -0.400946 |
| H | 0.596340  | -1.840169 | 1.050515  |
| H | -0.509444 | -1.637555 | -1.819221 |
| H | -1.127511 | -2.692292 | -0.537300 |
| F | -1.729691 | -0.766121 | 1.141703  |
| H | -0.724937 | 0.890333  | -1.551708 |
| F | -1.658540 | 1.765088  | 0.006348  |
| F | 2.596700  | -0.287566 | 0.467645  |
| H | 1.650716  | -0.192592 | -1.309861 |
| H | 0.404802  | 0.809988  | 1.290946  |
| F | 1.118901  | 2.019533  | -0.164345 |

4\_27

|   |           |           |           |
|---|-----------|-----------|-----------|
| C | -0.679332 | -1.281133 | 0.268543  |
| C | -0.005912 | -0.764945 | -0.994934 |
| C | 0.005912  | 0.764945  | -0.994934 |
| C | 0.679332  | 1.281133  | 0.268543  |
| C | -0.005912 | 0.768479  | 1.526224  |
| C | 0.005912  | -0.768479 | 1.526224  |
| H | 0.510577  | 1.154095  | -1.887726 |
| H | -0.510577 | -1.154095 | -1.887726 |
| H | 0.516114  | 1.160658  | 2.406518  |
| H | -1.036182 | 1.146343  | 1.545908  |
| H | 1.036182  | -1.146343 | 1.545908  |
| H | -0.516114 | -1.160658 | 2.406518  |
| F | 1.325854  | -1.191592 | -1.034578 |
| F | -1.325854 | 1.191592  | -1.034578 |
| H | 1.726690  | 0.950687  | 0.245707  |
| F | 0.676048  | 2.676951  | 0.244644  |
| H | -1.726690 | -0.950687 | 0.245707  |
| F | -0.676048 | -2.676951 | 0.244644  |

4\_28

|   |           |          |           |
|---|-----------|----------|-----------|
| C | -1.487510 | 0.253190 | -0.528832 |
|---|-----------|----------|-----------|

|   |           |           |           |
|---|-----------|-----------|-----------|
| C | -0.639569 | -0.968560 | -0.206655 |
| C | 0.821627  | -0.666618 | -0.508746 |
| C | 1.302485  | 0.522407  | 0.307171  |
| C | 0.423939  | 1.742547  | 0.048218  |
| C | -1.058014 | 1.444036  | 0.313880  |
| H | -0.978891 | -1.848800 | -0.767277 |
| H | 0.771372  | 2.569604  | 0.677879  |
| H | 0.566241  | 2.045853  | -0.999068 |
| H | -1.224322 | 1.202744  | 1.370713  |
| H | -1.675932 | 2.312989  | 0.060242  |
| F | -0.765759 | -1.264440 | 1.153188  |
| H | 1.314750  | 0.249966  | 1.369819  |
| F | 2.615211  | 0.820639  | -0.068286 |
| F | 1.590575  | -1.790157 | -0.230043 |
| H | 0.937736  | -0.438920 | -1.578339 |
| H | -1.374137 | 0.481681  | -1.599465 |
| F | -2.830535 | -0.047946 | -0.308718 |

4\_29

|   |           |           |           |
|---|-----------|-----------|-----------|
| C | 0.431567  | -1.402944 | -0.492793 |
| C | -0.096788 | -0.755275 | 0.776637  |
| C | 0.096788  | 0.755275  | 0.776637  |
| C | -0.431567 | 1.402944  | -0.492793 |
| C | 0.157338  | 0.749238  | -1.733238 |
| C | -0.157338 | -0.749238 | -1.733238 |
| H | -0.253820 | 1.236294  | -2.624843 |
| H | 1.244131  | 0.913449  | -1.736957 |
| H | -1.244131 | -0.913449 | -1.736957 |
| H | 0.253820  | -1.236294 | -2.624843 |
| H | -1.163707 | -0.991974 | 0.891061  |
| F | 0.571700  | -1.283931 | 1.878023  |
| F | -0.096788 | 2.757756  | -0.470716 |
| H | -1.529085 | 1.337176  | -0.498657 |
| H | 1.163707  | 0.991974  | 0.891061  |
| F | -0.571700 | 1.283931  | 1.878023  |
| H | 1.529085  | -1.337176 | -0.498657 |
| F | 0.096788  | -2.757756 | -0.470716 |

4\_30

|   |           |           |           |
|---|-----------|-----------|-----------|
| C | 1.573812  | -0.396430 | 0.129015  |
| C | 0.840588  | 0.946620  | 0.158309  |
| C | -0.641307 | 0.823138  | -0.184607 |
| C | -1.193173 | -0.527691 | 0.238654  |
| C | -0.500897 | -1.666409 | -0.521159 |
| C | 0.962455  | -1.340294 | -0.887286 |
| H | 0.944102  | 1.393911  | 1.154380  |
| H | 1.018183  | -0.838462 | -1.863214 |
| H | -1.087631 | -0.639243 | 1.324751  |
| H | -1.080444 | -1.846052 | -1.434570 |
| H | -0.548777 | -2.576747 | 0.085000  |
| H | 1.557300  | -2.257974 | -0.957875 |
| H | 2.638470  | -0.210271 | -0.057875 |
| H | -0.778515 | 0.953708  | -1.266867 |
| F | 1.458956  | -0.968236 | 1.409231  |
| F | 1.452660  | 1.791983  | -0.772357 |
| F | -1.340704 | 1.845011  | 0.453223  |
| F | -2.561085 | -0.559032 | -0.043573 |

4\_31

|   |          |          |          |
|---|----------|----------|----------|
| C | 1.061414 | 1.043935 | 0.088721 |
|---|----------|----------|----------|

|   |           |           |           |
|---|-----------|-----------|-----------|
| C | -0.463829 | 0.992458  | 0.276587  |
| C | -1.097140 | -0.196821 | -0.429075 |
| C | -0.266270 | -1.450703 | -0.237890 |
| C | 1.111312  | -1.291339 | -0.894757 |
| C | 1.530381  | 0.180865  | -1.069917 |
| H | -0.696460 | 0.953931  | 1.346115  |
| H | 1.092984  | 0.601222  | -1.986573 |
| H | 1.110870  | -1.790883 | -1.871190 |
| H | 1.827451  | -1.817505 | -0.253961 |
| H | 2.619661  | 0.259919  | -1.166017 |
| H | 1.343758  | 2.094557  | -0.055371 |
| H | -1.170695 | 0.020906  | -1.503987 |
| F | 1.677937  | 0.599657  | 1.264386  |
| F | -1.015120 | 2.162565  | -0.258449 |
| F | -2.390907 | -0.391331 | 0.046266  |
| H | -0.809447 | -2.317444 | -0.634138 |
| F | -0.113390 | -1.668121 | 1.139254  |

4\_32

|   |           |           |           |
|---|-----------|-----------|-----------|
| C | -1.395002 | -0.680447 | 0.133857  |
| C | -1.018299 | 0.650298  | -0.538490 |
| C | 0.457436  | 1.009342  | -0.357631 |
| C | 1.258210  | -0.270363 | -0.511462 |
| C | 1.027642  | -1.205111 | 0.678097  |
| C | -0.417576 | -1.102282 | 1.216228  |
| H | -1.224907 | 0.547476  | -1.611761 |
| H | -0.470977 | -0.346742 | 2.009024  |
| H | 1.737047  | -0.920875 | 1.462694  |
| H | 1.256936  | -2.230821 | 0.370213  |
| H | -0.743683 | -2.059826 | 1.638314  |
| H | -2.420562 | -0.599539 | 0.513834  |
| F | -1.394947 | -1.666994 | -0.874990 |
| F | -1.811083 | 1.674204  | -0.033235 |
| H | 0.950889  | -0.749851 | -1.451124 |
| F | 2.617362  | 0.028013  | -0.629056 |
| F | 0.662723  | 1.540204  | 0.917747  |
| H | 0.774303  | 1.772710  | -1.078977 |

4\_33

|   |           |           |           |
|---|-----------|-----------|-----------|
| C | -1.366846 | -0.436909 | 0.285114  |
| C | -0.653914 | 0.658516  | -0.501175 |
| C | 0.683878  | 0.999620  | 0.117455  |
| C | 1.635518  | -0.203209 | 0.045988  |
| C | 0.894499  | -1.540344 | 0.039938  |
| C | -0.377499 | -1.435345 | 0.890217  |
| H | -0.476070 | 0.299318  | -1.524077 |
| H | -0.122184 | -1.107464 | 1.905457  |
| H | 1.552749  | -2.335543 | 0.407599  |
| H | 0.629746  | -1.784324 | -0.997196 |
| H | -0.879394 | -2.406500 | 0.967872  |
| H | -1.997309 | 0.023017  | 1.054836  |
| F | -2.220725 | -1.110977 | -0.603307 |
| F | -1.455657 | 1.793917  | -0.586041 |
| F | 0.495601  | 1.327180  | 1.468788  |
| H | 1.135721  | 1.865585  | -0.380331 |
| H | 2.319281  | -0.126828 | 0.900821  |
| F | 2.396741  | -0.085812 | -1.123907 |

4\_34

|   |          |          |          |
|---|----------|----------|----------|
| C | 1.429324 | 0.611082 | 0.363344 |
|---|----------|----------|----------|

|   |           |           |           |
|---|-----------|-----------|-----------|
| C | 0.995657  | -0.855768 | 0.334005  |
| C | -0.503314 | -1.037761 | 0.051892  |
| C | -1.071824 | 0.165791  | -0.671207 |
| C | -0.957755 | 1.430338  | 0.182077  |
| C | 0.341067  | 1.445729  | 1.022871  |
| H | 0.151536  | 1.022688  | 2.018190  |
| H | -0.525606 | 0.272726  | -1.615922 |
| H | -1.828461 | 1.460690  | 0.846313  |
| H | -1.002181 | 2.306109  | -0.473474 |
| H | 0.700183  | 2.471631  | 1.159858  |
| H | 2.397706  | 0.705508  | 0.870521  |
| F | 1.620571  | 1.069355  | -0.948900 |
| F | -2.411925 | -0.068750 | -0.990357 |
| H | 1.187009  | -1.288563 | 1.324658  |
| F | 1.742399  | -1.556342 | -0.606320 |
| H | -0.666787 | -1.960902 | -0.516564 |
| F | -1.152415 | -1.171636 | 1.288746  |

4\_35

|   |           |           |           |
|---|-----------|-----------|-----------|
| C | 1.323100  | 0.061672  | -0.611640 |
| C | 0.670419  | -0.907520 | 0.351652  |
| C | -0.852478 | -0.877860 | 0.169394  |
| C | -1.356715 | 0.478376  | -0.311458 |
| C | -0.504010 | 1.606807  | 0.250417  |
| C | 0.940354  | 1.508097  | -0.290210 |
| H | 1.041128  | -1.928966 | 0.203897  |
| H | 1.646487  | 1.879345  | 0.460272  |
| H | -1.351362 | 0.490640  | -1.410486 |
| H | -0.507057 | 1.533643  | 1.344387  |
| H | -0.960035 | 2.564585  | -0.023366 |
| H | 1.062271  | 2.115677  | -1.194472 |
| H | -1.325544 | -1.119793 | 1.129048  |
| F | 0.962932  | -0.526719 | 1.666087  |
| F | -1.201742 | -1.862099 | -0.759925 |
| F | -2.685909 | 0.634639  | 0.091051  |
| H | 0.998142  | -0.222945 | -1.623146 |
| F | 2.710491  | -0.082446 | -0.578887 |

4\_36

|   |           |           |           |
|---|-----------|-----------|-----------|
| C | 1.172372  | -0.402442 | 0.467489  |
| C | 0.445175  | 0.932392  | 0.265210  |
| C | -0.911677 | 0.717680  | -0.410718 |
| C | -1.474105 | -0.666139 | -0.165327 |
| C | -0.551991 | -1.728115 | -0.772399 |
| C | 0.940633  | -1.330146 | -0.715225 |
| H | 0.311299  | 1.459974  | 1.216632  |
| H | 1.247352  | -0.809013 | -1.631454 |
| H | -0.853695 | -1.907791 | -1.811465 |
| H | -0.728491 | -2.656183 | -0.216064 |
| H | 1.573063  | -2.218789 | -0.612829 |
| H | -0.763568 | 0.835951  | -1.493267 |
| F | 1.210918  | 1.749701  | -0.568769 |
| F | -1.812868 | 1.695157  | 0.002473  |
| H | -2.493153 | -0.735885 | -0.564391 |
| F | -1.575350 | -0.869325 | 1.224840  |
| F | 2.531334  | -0.158178 | 0.642505  |
| H | 0.798440  | -0.863826 | 1.389216  |

4\_37

|   |          |          |           |
|---|----------|----------|-----------|
| C | 1.164297 | 0.516009 | -0.253907 |
|---|----------|----------|-----------|

|   |           |           |           |
|---|-----------|-----------|-----------|
| C | 0.706772  | -0.831901 | 0.279456  |
| C | -0.816310 | -0.919014 | 0.456678  |
| C | -1.567822 | 0.109726  | -0.378726 |
| C | -1.135280 | 1.537539  | -0.054167 |
| C | 0.342274  | 1.629252  | 0.379941  |
| H | 0.425665  | 1.538851  | 1.470635  |
| H | -1.779539 | 1.931644  | 0.739780  |
| H | -1.318442 | 2.135558  | -0.955251 |
| H | 0.772794  | 2.594855  | 0.092547  |
| H | 1.166280  | -0.990628 | 1.264163  |
| F | 1.127136  | -1.854878 | -0.568587 |
| H | -1.141532 | -1.938721 | 0.219149  |
| F | -1.129823 | -0.652543 | 1.796911  |
| F | -1.259183 | -0.184599 | -1.719442 |
| H | -2.651073 | -0.017749 | -0.262514 |
| F | 2.515013  | 0.688611  | 0.069225  |
| H | 1.083969  | 0.527192  | -1.347117 |

4\_38

|   |           |           |           |
|---|-----------|-----------|-----------|
| C | -0.058853 | -1.382848 | 0.077295  |
| C | 1.216433  | -0.535638 | 0.186498  |
| C | 0.975100  | 0.919251  | -0.186684 |
| C | -0.418533 | 1.358522  | 0.237618  |
| C | -1.460260 | 0.621656  | -0.607814 |
| C | -1.035470 | -0.815716 | -0.937244 |
| H | 1.597249  | -0.590365 | 1.213789  |
| H | -0.540028 | -0.838335 | -1.918101 |
| H | -0.583147 | 1.105297  | 1.291454  |
| H | -0.513897 | 2.443310  | 0.119734  |
| H | -1.651142 | 1.165619  | -1.542787 |
| H | -1.931224 | -1.443933 | -1.001903 |
| H | 0.231039  | -2.411079 | -0.173839 |
| H | 1.107090  | 1.031738  | -1.272540 |
| F | -0.668737 | -1.409474 | 1.339920  |
| F | 2.177500  | -1.080181 | -0.672445 |
| F | 1.939423  | 1.721685  | 0.426620  |
| F | -2.673348 | 0.606458  | 0.091035  |

4\_39

|   |           |           |           |
|---|-----------|-----------|-----------|
| C | -0.277936 | 1.455201  | -0.046608 |
| C | -1.291118 | 0.302053  | -0.049305 |
| C | -0.613619 | -1.059669 | -0.033220 |
| C | 0.651015  | -1.008928 | 0.807317  |
| C | 1.693227  | -0.101854 | 0.149987  |
| C | 1.059143  | 1.052236  | -0.638375 |
| H | -1.942118 | 0.396343  | 0.828772  |
| H | 0.883619  | 0.708269  | -1.666540 |
| H | 0.410168  | -0.626983 | 1.806963  |
| H | 1.070094  | -2.015574 | 0.913246  |
| H | 1.734095  | 1.913843  | -0.683899 |
| H | -0.720276 | 2.305588  | -0.579564 |
| H | -0.383270 | -1.358933 | -1.064363 |
| F | -0.076019 | 1.851982  | 1.289137  |
| F | -2.078399 | 0.417832  | -1.199194 |
| F | -1.498980 | -2.008125 | 0.485199  |
| F | 2.457024  | -0.865022 | -0.752982 |
| H | 2.390768  | 0.273198  | 0.907163  |

4\_40

|   |          |          |          |
|---|----------|----------|----------|
| C | 0.242159 | 1.270611 | 0.339395 |
|---|----------|----------|----------|

|   |           |           |           |
|---|-----------|-----------|-----------|
| C | 1.273450  | 0.431062  | -0.431074 |
| C | 0.850858  | -1.025345 | -0.612956 |
| C | -0.641479 | -1.073619 | -0.901171 |
| C | -1.429770 | -0.644170 | 0.342909  |
| C | -0.709699 | 0.427845  | 1.167978  |
| H | 1.382722  | 0.880788  | -1.426704 |
| H | -0.119737 | -0.059614 | 1.953518  |
| H | -0.871416 | -0.366393 | -1.708531 |
| H | -0.944522 | -2.075652 | -1.223208 |
| H | -1.459199 | 1.069575  | 1.645484  |
| H | 0.778848  | 1.999393  | 0.959533  |
| F | -0.501756 | 1.991817  | -0.611936 |
| F | 2.505365  | 0.488918  | 0.214274  |
| H | -1.641660 | -1.511054 | 0.979296  |
| F | -2.675382 | -0.156349 | -0.082273 |
| F | 1.106503  | -1.741741 | 0.567822  |
| H | 1.449272  | -1.499151 | -1.400852 |

#### 4\_41

|   |           |           |           |
|---|-----------|-----------|-----------|
| C | -0.819976 | 1.103432  | -0.408416 |
| C | -1.393236 | -0.135259 | 0.297922  |
| C | -0.329885 | -1.170797 | 0.656805  |
| C | 0.896164  | -0.448710 | 1.194035  |
| C | 1.543388  | 0.465122  | 0.142110  |
| C | 0.574138  | 0.888482  | -0.964768 |
| H | -1.865554 | 0.207508  | 1.227833  |
| H | 0.528223  | 0.086018  | -1.709369 |
| H | 0.586773  | 0.154502  | 2.058078  |
| H | 1.646290  | -1.170559 | 1.535464  |
| H | 0.924833  | 1.802913  | -1.456510 |
| H | -1.525714 | 1.420363  | -1.185214 |
| F | -0.753788 | 2.138319  | 0.550231  |
| F | -2.373072 | -0.719639 | -0.499276 |
| F | 0.021135  | -1.899140 | -0.485048 |
| H | -0.733694 | -1.892646 | 1.378725  |
| H | 1.966511  | 1.345818  | 0.639450  |
| F | 2.622257  | -0.204823 | -0.454194 |

#### 4\_42

|   |           |           |           |
|---|-----------|-----------|-----------|
| C | -0.130871 | -1.138582 | -0.455927 |
| C | -1.230177 | -0.089564 | -0.273233 |
| C | -0.630034 | 1.237231  | 0.201738  |
| C | 0.842196  | 1.380484  | -0.157309 |
| C | 1.673667  | 0.272005  | 0.505660  |
| C | 0.889498  | -1.034074 | 0.664187  |
| H | -1.793536 | 0.062590  | -1.202304 |
| H | 0.372660  | -1.055381 | 1.632470  |
| H | 0.965274  | 1.302900  | -1.244787 |
| H | 1.196936  | 2.370717  | 0.147843  |
| H | 2.063074  | 0.598442  | 1.477754  |
| H | 1.588889  | -1.876473 | 0.630078  |
| H | -0.765754 | 1.285220  | 1.290864  |
| F | -2.129401 | -0.538607 | 0.695843  |
| F | -1.348099 | 2.300765  | -0.350390 |
| F | 2.792369  | 0.033581  | -0.311052 |
| F | -0.700948 | -2.405216 | -0.503226 |
| H | 0.361495  | -0.967714 | -1.423178 |

#### 4\_43

|   |          |           |           |
|---|----------|-----------|-----------|
| C | 1.174148 | -0.250088 | -0.616975 |
|---|----------|-----------|-----------|

|   |           |           |           |
|---|-----------|-----------|-----------|
| C | 0.391617  | -0.978855 | 0.454471  |
| C | -1.117094 | -0.864068 | 0.184687  |
| C | -1.488559 | 0.304095  | -0.729842 |
| C | -0.630421 | 1.530917  | -0.449948 |
| C | 0.872852  | 1.245669  | -0.606990 |
| H | 0.674685  | -2.037712 | 0.494771  |
| H | 1.396722  | 1.699333  | 0.241311  |
| H | -1.328429 | -0.004485 | -1.771614 |
| H | -2.549354 | 0.551832  | -0.611978 |
| H | 1.256708  | 1.698203  | -1.528383 |
| H | -1.617046 | -0.782510 | 1.156053  |
| F | 0.671393  | -0.409418 | 1.697646  |
| F | -1.547391 | -2.051456 | -0.425158 |
| F | -0.891593 | 1.946471  | 0.868494  |
| H | -0.934146 | 2.361810  | -1.098447 |
| F | 2.543133  | -0.453445 | -0.442224 |
| H | 0.905727  | -0.701860 | -1.582957 |

4\_44

|   |           |           |           |
|---|-----------|-----------|-----------|
| C | 1.126723  | -1.000115 | 0.052976  |
| C | 1.536372  | 0.454194  | 0.313601  |
| C | 0.392077  | 1.438044  | 0.064863  |
| C | -0.952402 | 0.781716  | 0.354171  |
| C | -1.221164 | -0.338016 | -0.642068 |
| C | 0.057011  | -1.100350 | -1.017738 |
| H | 0.504596  | 2.337437  | 0.679625  |
| H | 1.915394  | 0.521472  | 1.340732  |
| H | 0.479498  | -0.680450 | -1.940424 |
| H | -0.989969 | 0.373352  | 1.370927  |
| H | -1.681068 | 0.102846  | -1.536629 |
| H | -0.202598 | -2.147034 | -1.212821 |
| H | 2.020672  | -1.578657 | -0.210869 |
| H | 0.421858  | 1.741382  | -0.990292 |
| F | 0.624851  | -1.516254 | 1.259295  |
| F | 2.594121  | 0.764137  | -0.552077 |
| F | -1.961894 | 1.743724  | 0.251527  |
| F | -2.157088 | -1.223072 | -0.098198 |

4\_45

|   |           |           |           |
|---|-----------|-----------|-----------|
| C | -1.377765 | 0.774824  | 0.083670  |
| C | -1.383038 | -0.761049 | 0.099397  |
| C | 0.020506  | -1.363411 | 0.019910  |
| C | 1.005244  | -0.408510 | 0.678936  |
| C | 1.162507  | 0.859422  | -0.159329 |
| C | -0.200234 | 1.357422  | -0.674130 |
| H | 0.056411  | -2.342821 | 0.508350  |
| H | -1.908966 | -1.081119 | 1.007675  |
| H | -0.289052 | 1.023523  | -1.716447 |
| H | 0.653899  | -0.123780 | 1.679009  |
| H | -0.253219 | 2.451491  | -0.667026 |
| H | -2.329530 | 1.120680  | -0.337296 |
| H | 0.293660  | -1.490078 | -1.034947 |
| F | -1.328193 | 1.215707  | 1.422039  |
| F | -2.131967 | -1.195526 | -1.001522 |
| F | 2.246246  | -1.019284 | 0.834927  |
| F | 1.960097  | 0.561831  | -1.271478 |
| H | 1.697836  | 1.625363  | 0.414272  |

4\_46

|   |           |          |          |
|---|-----------|----------|----------|
| C | -0.968495 | 1.049239 | 0.126128 |
|---|-----------|----------|----------|

|   |           |           |           |
|---|-----------|-----------|-----------|
| C | -1.443920 | -0.400383 | -0.064304 |
| C | -0.347996 | -1.331278 | -0.575161 |
| C | 0.968497  | -1.049235 | 0.126188  |
| C | 1.443936  | 0.400374  | -0.064298 |
| C | 0.348020  | 1.331262  | -0.575188 |
| H | -0.638321 | -2.379095 | -0.437892 |
| H | -1.848134 | -0.749271 | 0.892244  |
| H | 0.210270  | 1.156313  | -1.650592 |
| H | 0.638341  | 2.379082  | -0.437929 |
| H | -1.760947 | 1.718459  | -0.230233 |
| H | -0.210219 | -1.156346 | -1.650564 |
| F | -0.800203 | 1.286768  | 1.500076  |
| F | -2.489979 | -0.401403 | -0.999405 |
| F | 0.800151  | -1.286691 | 1.500142  |
| H | 1.760960  | -1.718477 | -0.230108 |
| F | 2.489989  | 0.401345  | -0.999407 |
| H | 1.848163  | 0.749292  | 0.892233  |

4\_47

|   |           |           |           |
|---|-----------|-----------|-----------|
| C | -1.088837 | -1.055119 | 0.246745  |
| C | -1.544706 | 0.382137  | 0.501392  |
| C | -0.388192 | 1.390157  | 0.437652  |
| C | 0.837402  | 0.833345  | -0.274424 |
| C | 1.354716  | -0.409560 | 0.439110  |
| C | 0.221854  | -1.298407 | 0.978244  |
| H | -0.734844 | 2.295999  | -0.071170 |
| H | 0.064956  | -1.092965 | 2.045974  |
| H | 0.530352  | -2.345072 | 0.880743  |
| H | -1.871595 | -1.763101 | 0.547898  |
| H | -0.088911 | 1.675099  | 1.455298  |
| F | -0.883529 | -1.239766 | -1.124831 |
| F | -2.536162 | 0.717937  | -0.419900 |
| H | -2.008820 | 0.412765  | 1.496669  |
| H | 2.008656  | -0.084170 | 1.259283  |
| H | 0.623794  | 0.589983  | -1.319696 |
| F | 1.840322  | 1.810383  | -0.264934 |
| F | 2.148590  | -1.148982 | -0.442258 |

4\_48

|   |           |           |           |
|---|-----------|-----------|-----------|
| C | 1.272666  | 0.860198  | -0.079423 |
| C | 1.079924  | -0.449075 | 0.662581  |
| C | 0.000003  | -1.311412 | -0.000013 |
| C | -1.079934 | -0.449070 | -0.662577 |
| C | -1.272659 | 0.860205  | 0.079422  |
| C | 0.000005  | 1.707743  | -0.000004 |
| H | 0.478993  | -1.949659 | -0.749420 |
| H | 0.029301  | 2.351641  | 0.886611  |
| H | -0.029276 | 2.351639  | -0.886621 |
| H | 2.146182  | 1.400630  | 0.304621  |
| H | -0.478974 | -1.949701 | 0.749364  |
| F | 1.540250  | 0.571286  | -1.431297 |
| F | 2.284192  | -1.154541 | 0.703574  |
| H | 0.806789  | -0.209127 | 1.697641  |
| H | -0.806811 | -0.209123 | -1.697639 |
| F | -2.284205 | -1.154539 | -0.703554 |
| F | -1.540243 | 0.571298  | 1.431294  |
| H | -2.146176 | 1.400634  | -0.304624 |

4\_49

|   |           |          |          |
|---|-----------|----------|----------|
| C | -0.909219 | 1.101298 | 0.039820 |
|---|-----------|----------|----------|

|   |           |           |           |
|---|-----------|-----------|-----------|
| C | -1.335937 | -0.148689 | -0.707777 |
| C | -0.577478 | -1.386566 | -0.225265 |
| C | 0.909223  | -1.101297 | 0.039881  |
| C | 1.335946  | 0.148652  | -0.707776 |
| C | 0.577492  | 1.386546  | -0.225303 |
| H | -1.026469 | -1.720249 | 0.716406  |
| H | 0.689876  | 2.188937  | -0.963112 |
| H | 1.026465  | 1.720224  | 0.716378  |
| H | -1.541334 | 1.949298  | -0.251631 |
| H | -0.689827 | -2.188964 | -0.963073 |
| F | -1.119466 | 0.895789  | 1.406577  |
| F | -2.706068 | -0.361336 | -0.558063 |
| H | -1.161001 | 0.029636  | -1.779295 |
| H | 1.161008  | -0.029717 | -1.779287 |
| F | 2.706078  | 0.361304  | -0.558076 |
| F | 1.119431  | -0.895703 | 1.406632  |
| H | 1.541349  | -1.949312 | -0.251498 |

4\_50

|   |           |           |           |
|---|-----------|-----------|-----------|
| C | 1.111232  | 0.628440  | -0.440880 |
| C | 1.215819  | -0.894844 | -0.383003 |
| C | -0.157083 | -1.520588 | -0.083045 |
| C | -1.306554 | -0.555753 | -0.349039 |
| C | -1.194809 | 0.710628  | 0.496342  |
| C | 0.260288  | 1.138545  | 0.709421  |
| H | -0.314739 | -2.439936 | -0.656668 |
| H | 1.660163  | -1.278470 | -1.309626 |
| H | 0.646377  | 0.724828  | 1.649019  |
| H | -1.352314 | -0.266372 | -1.407369 |
| H | -1.705075 | 0.543775  | 1.453026  |
| H | 0.303275  | 2.231342  | 0.769275  |
| H | -0.166891 | -1.785013 | 0.982125  |
| F | 2.089778  | -1.241390 | 0.653206  |
| F | -2.511784 | -1.200403 | -0.057187 |
| F | -1.885941 | 1.736784  | -0.166096 |
| F | 2.385205  | 1.184567  | -0.405063 |
| H | 0.660523  | 0.915253  | -1.402295 |

4\_51

|   |           |           |           |
|---|-----------|-----------|-----------|
| C | -1.244626 | -0.587876 | -0.129135 |
| C | -1.213994 | 0.894414  | 0.237081  |
| C | 0.186154  | 1.359379  | 0.642518  |
| C | 1.244643  | 0.587873  | -0.129150 |
| C | 1.214000  | -0.894416 | 0.237077  |
| C | -0.186141 | -1.359358 | 0.642562  |
| H | 0.276987  | 2.432946  | 0.443580  |
| H | -0.333679 | -1.201286 | 1.719032  |
| H | -0.276984 | -2.432934 | 0.443680  |
| H | 0.333713  | 1.201366  | 1.718993  |
| F | -1.640612 | 1.638369  | -0.872883 |
| H | -1.935439 | 1.074208  | 1.044026  |
| H | 1.935472  | -1.074222 | 1.043994  |
| H | 1.082841  | 0.687363  | -1.210601 |
| F | 2.510479  | 1.109024  | 0.150793  |
| F | 1.640562  | -1.638382 | -0.872902 |
| F | -2.510464 | -1.109029 | 0.150788  |
| H | -1.082801 | -0.687379 | -1.210581 |

4\_52

|   |          |           |          |
|---|----------|-----------|----------|
| C | 1.218677 | -0.486598 | 0.454099 |
|---|----------|-----------|----------|

|   |           |           |           |
|---|-----------|-----------|-----------|
| C | 0.913977  | 1.013171  | 0.324033  |
| C | -0.488559 | 1.296305  | -0.207760 |
| C | -1.454712 | 0.285267  | 0.394469  |
| C | -1.166572 | -1.133594 | -0.103762 |
| C | 0.314845  | -1.357942 | -0.410234 |
| H | -0.797540 | 2.313651  | 0.057091  |
| H | 1.044655  | 1.443626  | 1.326061  |
| H | -1.399137 | 0.326851  | 1.490842  |
| H | -1.724128 | -1.291920 | -1.034978 |
| H | -1.510859 | -1.872069 | 0.628526  |
| H | 0.586503  | -2.414911 | -0.299382 |
| H | 2.275895  | -0.660373 | 0.222860  |
| H | -0.485430 | 1.198185  | -1.299126 |
| F | 0.983036  | -0.869783 | 1.784452  |
| F | 1.862204  | 1.600480  | -0.514896 |
| F | -2.767698 | 0.629799  | 0.049089  |
| F | 0.587360  | -0.998572 | -1.740530 |

#### 4\_53

|   |           |           |           |
|---|-----------|-----------|-----------|
| C | 1.234483  | 0.185921  | 0.345965  |
| C | 0.385303  | 1.455443  | 0.207934  |
| C | -1.057841 | 1.157689  | -0.208758 |
| C | -1.499226 | -0.202445 | 0.322373  |
| C | -0.660858 | -1.341891 | -0.272050 |
| C | 0.750183  | -0.866419 | -0.627548 |
| H | -1.733456 | 1.939984  | 0.153551  |
| H | 0.426850  | 1.985696  | 1.167099  |
| H | -1.443971 | -0.216049 | 1.417637  |
| H | -1.166280 | -1.711313 | -1.171731 |
| H | -0.575483 | -2.168733 | 0.440891  |
| H | 2.293438  | 0.420969  | 0.187544  |
| H | -1.108456 | 1.144454  | -1.305267 |
| F | 1.083831  | -0.287279 | 1.656974  |
| F | 0.981609  | 2.272230  | -0.760156 |
| F | -2.844576 | -0.400086 | -0.014351 |
| F | 1.625470  | -1.952566 | -0.645570 |
| H | 0.778100  | -0.415492 | -1.629289 |

#### 4\_54

|   |           |           |           |
|---|-----------|-----------|-----------|
| C | 1.291118  | 0.302053  | -0.049305 |
| C | 0.613619  | -1.059669 | -0.033220 |
| C | -0.651015 | -1.008928 | 0.807317  |
| C | -1.693227 | -0.101854 | 0.149987  |
| C | -1.059143 | 1.052236  | -0.638375 |
| C | 0.277936  | 1.455201  | -0.046608 |
| H | -1.070094 | -2.015574 | 0.913246  |
| H | 0.383270  | -1.358933 | -1.064363 |
| H | -1.734095 | 1.913843  | -0.683899 |
| H | -0.883619 | 0.708269  | -1.666540 |
| H | 1.942118  | 0.396343  | 0.828772  |
| H | -0.410168 | -0.626983 | 1.806963  |
| F | 2.078399  | 0.417832  | -1.199194 |
| F | 1.498980  | -2.008125 | 0.485199  |
| H | 0.720276  | 2.305588  | -0.579564 |
| F | 0.076019  | 1.851982  | 1.289137  |
| F | -2.457024 | -0.865022 | -0.752982 |
| H | -2.390768 | 0.273198  | 0.907163  |

4\_55

|   |           |           |           |
|---|-----------|-----------|-----------|
| C | -0.391664 | -0.978839 | 0.454487  |
| C | 1.117053  | -0.864128 | 0.184694  |
| C | 1.488578  | 0.304020  | -0.729827 |
| C | 0.630496  | 1.530887  | -0.449957 |
| C | -0.872792 | 1.245693  | -0.606997 |
| C | -1.174154 | -0.250048 | -0.616969 |
| H | 2.549384  | 0.551707  | -0.611955 |
| H | 1.617014  | -0.782609 | 1.156059  |
| H | -1.256630 | 1.698237  | -1.528392 |
| H | -1.396642 | 1.699383  | 0.241300  |
| H | -0.674784 | -2.037680 | 0.494814  |
| H | 1.328444  | -0.004547 | -1.771602 |
| F | -0.671403 | -0.409366 | 1.697656  |
| F | 1.547278  | -2.051535 | -0.425160 |
| F | 0.891684  | 1.946472  | 0.868466  |
| H | 0.934257  | 2.361742  | -1.098486 |
| H | -0.905756 | -0.701848 | -1.582942 |
| F | -2.543158 | -0.453337 | -0.442227 |

4\_56

|   |           |           |           |
|---|-----------|-----------|-----------|
| C | -1.248336 | 0.548905  | 0.288385  |
| C | -1.057112 | -0.615899 | -0.690258 |
| C | 0.409713  | -1.031132 | -0.851030 |
| C | 1.256011  | -0.606657 | 0.339967  |
| C | 1.236477  | 0.914380  | 0.527514  |
| C | -0.101848 | 1.543489  | 0.132632  |
| H | 0.455026  | -2.118146 | -0.981109 |
| H | 2.007156  | 1.351527  | -0.119372 |
| H | 1.476751  | 1.172989  | 1.564322  |
| H | -2.229234 | 1.018143  | 0.147072  |
| H | 0.822659  | -0.557341 | -1.749898 |
| F | -1.196079 | 0.083715  | 1.606040  |
| F | -0.080103 | 1.905394  | -1.229010 |
| H | -0.295046 | 2.458689  | 0.704166  |
| H | 0.918273  | -1.116842 | 1.248586  |
| F | 2.581788  | -1.010201 | 0.120437  |
| F | -1.823263 | -1.691471 | -0.234774 |
| H | -1.466098 | -0.314477 | -1.661273 |

4\_57

|   |           |           |           |
|---|-----------|-----------|-----------|
| C | 1.138783  | 0.634395  | -0.044285 |
| C | -0.055857 | 1.388134  | -0.637681 |
| C | -1.334213 | 0.538444  | -0.660351 |
| C | -1.287517 | -0.603302 | 0.349322  |
| C | -0.099786 | -1.541146 | 0.089031  |
| C | 1.074216  | -0.793894 | -0.551106 |
| H | -2.191420 | 1.190549  | -0.459645 |
| H | -0.432918 | -2.346546 | -0.575748 |
| H | 0.251216  | -1.988156 | 1.024720  |
| H | 2.089168  | 1.116301  | -0.303726 |
| H | -1.470408 | 0.103065  | -1.659539 |
| F | 1.045221  | 0.630168  | 1.349045  |
| H | -1.253046 | -0.206789 | 1.369377  |
| F | -2.475983 | -1.339495 | 0.238556  |
| F | -0.258532 | 2.554793  | 0.096234  |
| H | 0.207888  | 1.690123  | -1.660254 |
| H | 0.972695  | -0.759334 | -1.645821 |

F 2.268523 -1.460466 -0.279273

4\_58

C 1.176476 -0.083738 -0.495675  
C 0.413720 -1.374545 -0.271850  
C -1.062554 -1.181198 -0.626487  
C -1.538759 0.253307 -0.365495  
C -0.784207 0.883502 0.794826  
C 0.700481 1.015604 0.451930  
H -1.233622 -1.455233 -1.674401  
H 0.869576 -2.190639 -0.845304  
H -1.420366 0.875438 -1.263665  
H -0.899639 0.251460 1.682601  
H -1.184425 1.879209 1.016514  
H -1.650202 -1.861201 0.001398  
F 0.528042 -1.724188 1.086080  
F -2.909451 0.228065 -0.081656  
F 0.921428 2.249280 -0.182612  
H 1.319497 0.999794 1.355607  
F 2.544526 -0.289159 -0.340267  
H 1.007322 0.247593 -1.530144

4\_59

C -0.692433 0.142924 0.842659  
C -0.488816 -1.168028 0.068214  
C 0.759756 -1.102359 -0.823961  
C 1.797680 -0.133322 -0.282588  
C 1.264893 1.298538 -0.167686  
C -0.248681 1.356734 0.050825  
H 1.198391 -2.098530 -0.947123  
H -0.425616 -1.993537 0.787492  
H 1.489766 1.854912 -1.085280  
H 1.787325 1.790136 0.661761  
H 0.434973 -0.739364 -1.806645  
F -1.596803 -1.424651 -0.735915  
H -0.551668 2.276730 0.566174  
F -0.889277 1.361982 -1.197455  
F 2.177727 -0.577271 1.008105  
H 2.710591 -0.154837 -0.889917  
H -0.071610 0.101557 1.747590  
F -2.016820 0.261718 1.240950

4\_60

C 0.899221 0.215684 -0.564134  
C 0.682915 -1.265631 -0.324391  
C -0.806767 -1.605514 -0.356066  
C -1.685631 -0.449940 0.131287  
C -0.968300 0.428629 1.144743  
C 0.327237 1.033557 0.587354  
H -1.115147 -1.862732 -1.376363  
H 1.255720 -1.857046 -1.048604  
H -0.728965 -0.190625 2.017746  
H -1.620935 1.247569 1.467520  
H -0.959233 -2.488094 0.276406  
F 1.193111 -1.584467 0.950903  
F -2.025299 0.346800 -0.982807  
H -2.632037 -0.828648 0.537405  
H 1.088186 1.105531 1.372914

|   |          |          |           |
|---|----------|----------|-----------|
| F | 0.085793 | 2.333645 | 0.129668  |
| F | 2.259970 | 0.484760 | -0.704928 |
| H | 0.398187 | 0.506691 | -1.495306 |

4\_61

|   |           |           |           |
|---|-----------|-----------|-----------|
| C | -1.167067 | 0.264299  | -0.194814 |
| C | -0.248170 | 1.371775  | 0.330568  |
| C | 1.138017  | 0.866861  | 0.719736  |
| C | 1.595743  | -0.185811 | -0.275860 |
| C | 0.694781  | -1.425965 | -0.216898 |
| C | -0.715942 | -1.103274 | 0.288154  |
| H | 1.832024  | 1.714792  | 0.737822  |
| H | 1.165031  | -2.158416 | 0.449017  |
| H | 0.600112  | -1.883782 | -1.208336 |
| H | 1.105622  | 0.429363  | 1.726648  |
| H | 1.605432  | 0.247276  | -1.284678 |
| F | 2.913089  | -0.564252 | 0.008489  |
| F | -0.110478 | 2.342103  | -0.673997 |
| H | -0.742992 | 1.854575  | 1.181762  |
| H | -0.775653 | -1.135557 | 1.384600  |
| F | -1.599143 | -2.071011 | -0.189319 |
| F | -2.470813 | 0.506642  | 0.232702  |
| H | -1.167646 | 0.283092  | -1.293031 |

4\_62

|   |           |           |           |
|---|-----------|-----------|-----------|
| C | -0.618294 | 0.743370  | -0.241176 |
| C | 0.676217  | 1.099016  | 0.485581  |
| C | 1.438524  | -0.130331 | 0.993475  |
| C | 1.136315  | -1.368651 | 0.165143  |
| C | -0.350280 | -1.723448 | 0.211566  |
| C | -1.248443 | -0.492837 | 0.378442  |
| H | 2.510111  | 0.098635  | 0.980657  |
| H | -0.538786 | -2.431213 | 1.027389  |
| H | -0.616070 | -2.217675 | -0.730100 |
| H | 1.148695  | -0.337301 | 2.032960  |
| F | 1.489412  | 1.837000  | -0.377489 |
| H | 0.419793  | 1.760307  | 1.323828  |
| H | 1.748728  | -2.222130 | 0.482656  |
| F | 1.492683  | -1.097998 | -1.170095 |
| F | -2.477798 | -0.743075 | -0.230966 |
| H | -1.460002 | -0.285419 | 1.437651  |
| F | -1.504447 | 1.814592  | -0.133419 |
| H | -0.415349 | 0.577408  | -1.305502 |

4\_63

|   |           |           |           |
|---|-----------|-----------|-----------|
| C | -0.578422 | -0.915329 | -0.495595 |
| C | -1.447925 | 0.348931  | -0.426520 |
| C | -0.734431 | 1.529078  | 0.222874  |
| C | 0.734431  | 1.529078  | -0.222875 |
| C | 1.447925  | 0.348931  | 0.426520  |
| C | 0.578422  | -0.915329 | 0.495595  |
| H | -1.233199 | 2.464491  | -0.054013 |
| H | -1.733005 | 0.590015  | -1.459385 |
| H | 0.800465  | 1.420552  | -1.313199 |
| H | 1.233199  | 2.464491  | 0.054012  |
| H | 1.733005  | 0.590016  | 1.459384  |
| H | 1.212969  | -1.796324 | 0.340059  |
| H | -1.212969 | -1.796324 | -0.340058 |
| H | -0.800465 | 1.420552  | 1.313198  |

|   |           |           |           |
|---|-----------|-----------|-----------|
| F | -0.008475 | -0.994448 | -1.773203 |
| F | -2.619505 | 0.055023  | 0.277218  |
| F | 2.619505  | 0.055023  | -0.277218 |
| F | 0.008475  | -0.994447 | 1.773204  |

#### 4\_64

|   |           |           |           |
|---|-----------|-----------|-----------|
| C | -0.683878 | 0.999620  | 0.117455  |
| C | -1.635518 | -0.203209 | 0.045988  |
| C | -0.894499 | -1.540344 | 0.039938  |
| C | 0.377499  | -1.435345 | 0.890217  |
| C | 1.366846  | -0.436909 | 0.285114  |
| C | 0.653914  | 0.658516  | -0.501175 |
| H | -1.552749 | -2.335543 | 0.407599  |
| H | -2.319281 | -0.126828 | 0.900821  |
| H | 0.122184  | -1.107464 | 1.905457  |
| H | 0.879394  | -2.406500 | 0.967872  |
| H | -1.135721 | 1.865584  | -0.380331 |
| H | -0.629746 | -1.784324 | -0.997195 |
| F | -0.495601 | 1.327180  | 1.468788  |
| F | -2.396741 | -0.085812 | -1.123907 |
| H | 1.997309  | 0.023017  | 1.054836  |
| F | 2.220725  | -1.110977 | -0.603307 |
| F | 1.455657  | 1.793917  | -0.586041 |
| H | 0.476071  | 0.299318  | -1.524077 |

#### 4\_65

|   |           |           |           |
|---|-----------|-----------|-----------|
| C | 1.097140  | -0.196821 | -0.429075 |
| C | 0.266270  | -1.450703 | -0.237890 |
| C | -1.111312 | -1.291339 | -0.894757 |
| C | -1.530381 | 0.180865  | -1.069917 |
| C | -1.061414 | 1.043935  | 0.088721  |
| C | 0.463829  | 0.992458  | 0.276587  |
| H | -1.110870 | -1.790883 | -1.871190 |
| H | 0.809447  | -2.317444 | -0.634138 |
| H | -1.092984 | 0.601222  | -1.986573 |
| H | -2.619661 | 0.259919  | -1.166017 |
| H | -1.827451 | -1.817505 | -0.253961 |
| F | 0.113390  | -1.668121 | 1.139254  |
| H | -1.343758 | 2.094557  | -0.055371 |
| F | -1.677937 | 0.599657  | 1.264386  |
| F | 1.015120  | 2.162565  | -0.258449 |
| H | 0.696460  | 0.953931  | 1.346115  |
| H | 1.170695  | 0.020906  | -1.503987 |
| F | 2.390907  | -0.391331 | 0.046266  |

#### 4\_66

|   |           |           |           |
|---|-----------|-----------|-----------|
| C | 0.740626  | 0.804523  | -0.172220 |
| C | 1.453696  | -0.420127 | 0.404812  |
| C | 0.520151  | -1.617054 | 0.560510  |
| C | -0.520150 | -1.617055 | -0.560508 |
| C | -1.453695 | -0.420128 | -0.404812 |
| C | -0.740626 | 0.804523  | 0.172220  |
| H | 1.127762  | -2.529262 | 0.555844  |
| H | -0.013473 | -1.561027 | -1.533679 |
| H | -1.127761 | -2.529262 | -0.555842 |
| H | 0.013474  | -1.561025 | 1.533681  |
| F | 2.494679  | -0.763205 | -0.472428 |
| H | 1.915977  | -0.139878 | 1.359635  |

|   |           |           |           |
|---|-----------|-----------|-----------|
| F | -2.494680 | -0.763205 | 0.472427  |
| H | -1.915975 | -0.139879 | -1.359636 |
| H | -0.869893 | 0.816485  | 1.262783  |
| F | -1.325659 | 1.964275  | -0.330074 |
| H | 0.869893  | 0.816486  | -1.262783 |
| F | 1.325658  | 1.964276  | 0.330074  |

#### 4\_67

|   |           |           |           |
|---|-----------|-----------|-----------|
| C | -1.470328 | 0.740774  | -0.177970 |
| C | -0.248813 | 1.447642  | 0.403391  |
| C | 0.981121  | 0.539598  | 0.533243  |
| C | 0.981121  | -0.539597 | -0.533243 |
| C | -0.248813 | -1.447642 | -0.403391 |
| C | -1.470328 | -0.740774 | 0.177971  |
| H | 0.006248  | 2.274158  | -0.270809 |
| H | -0.498862 | 1.872797  | 1.380730  |
| H | 1.031353  | -0.064374 | -1.520680 |
| H | 0.006248  | -2.274158 | 0.270808  |
| H | -0.498863 | -1.872796 | -1.380730 |
| H | -2.399656 | -1.230085 | -0.136471 |
| H | -2.399656 | 1.230085  | 0.136472  |
| H | 1.031353  | 0.064374  | 1.520680  |
| F | -1.429237 | 0.800956  | -1.584370 |
| F | 2.128018  | 1.326794  | 0.397463  |
| F | 2.128018  | -1.326793 | -0.397463 |
| F | -1.429236 | -0.800956 | 1.584370  |

#### 4\_68

|   |           |           |           |
|---|-----------|-----------|-----------|
| C | -1.159964 | -1.045492 | -0.014099 |
| C | 0.227112  | -1.549927 | -0.408286 |
| C | 1.269708  | -0.426734 | -0.512872 |
| C | 0.928616  | 0.737209  | 0.401639  |
| C | -0.428385 | 1.350178  | 0.026450  |
| C | -1.377468 | 0.330652  | -0.608207 |
| H | 0.562182  | -2.255694 | 0.360251  |
| H | 0.167892  | -2.090615 | -1.359846 |
| H | 0.943961  | 0.393493  | 1.442449  |
| H | -0.247710 | 2.173250  | -0.673961 |
| H | -0.915705 | 1.757533  | 0.917679  |
| H | -1.951355 | -1.740224 | -0.320583 |
| H | 1.358567  | -0.046640 | -1.540758 |
| F | -1.231892 | -0.941530 | 1.385954  |
| F | 2.518673  | -0.945864 | -0.169450 |
| F | 1.914483  | 1.718860  | 0.274246  |
| F | -2.697072 | 0.744074  | -0.428526 |
| H | -1.213266 | 0.253713  | -1.692992 |

#### 4\_69

|   |           |           |           |
|---|-----------|-----------|-----------|
| C | 1.137862  | 0.380975  | -0.912250 |
| C | -0.264797 | -0.027038 | -1.384629 |
| C | -1.089380 | -0.703552 | -0.290392 |
| C | -0.920944 | -0.001996 | 1.042621  |
| C | 0.535336  | -0.097410 | 1.515047  |
| C | 1.540719  | -0.310860 | 0.386697  |
| H | -0.788029 | 0.886261  | -1.688672 |
| H | -0.200287 | -0.691438 | -2.252562 |
| H | 0.653497  | -0.926231 | 2.223336  |
| H | 0.771333  | 0.834308  | 2.041090  |
| H | 1.886848  | 0.175128  | -1.686212 |
| H | -0.791647 | -1.751363 | -0.161531 |

|   |           |           |           |
|---|-----------|-----------|-----------|
| F | 1.182941  | 1.757342  | -0.651198 |
| F | -2.435063 | -0.700513 | -0.665903 |
| H | 2.543908  | 0.008588  | 0.693521  |
| F | 1.622807  | -1.686804 | 0.087243  |
| F | -1.270229 | 1.346151  | 0.885942  |
| H | -1.612508 | -0.421553 | 1.783706  |

#### 4\_70

|   |           |           |           |
|---|-----------|-----------|-----------|
| C | -0.909227 | -1.101295 | 0.039853  |
| C | 0.577478  | -1.386560 | -0.225287 |
| C | 1.335938  | -0.148671 | -0.707777 |
| C | 0.909227  | 1.101295  | 0.039853  |
| C | -0.577478 | 1.386560  | -0.225287 |
| C | -1.335938 | 0.148671  | -0.707777 |
| H | 1.026459  | -1.720253 | 0.716385  |
| H | 0.689838  | -2.188937 | -0.963113 |
| H | -0.689839 | 2.188937  | -0.963114 |
| H | -1.026459 | 1.720252  | 0.716385  |
| H | -1.541345 | -1.949302 | -0.251569 |
| H | 1.161005  | 0.029675  | -1.779294 |
| F | -1.119452 | -0.895746 | 1.406603  |
| F | 2.706071  | -0.361326 | -0.558063 |
| F | 1.119452  | 0.895746  | 1.406602  |
| H | 1.541344  | 1.949302  | -0.251570 |
| H | -1.161005 | -0.029675 | -1.779294 |
| F | -2.706071 | 0.361325  | -0.558063 |

#### 4\_71

|   |           |           |           |
|---|-----------|-----------|-----------|
| C | 1.272662  | 0.860200  | 0.079425  |
| C | 0.000000  | 1.707747  | 0.000000  |
| C | -1.272662 | 0.860200  | -0.079425 |
| C | -1.079932 | -0.449075 | 0.662570  |
| C | 0.000000  | -1.311416 | 0.000000  |
| C | 1.079932  | -0.449075 | -0.662570 |
| H | -0.029283 | 2.351644  | 0.886616  |
| H | 0.029283  | 2.351644  | -0.886616 |
| H | -0.478984 | -1.949683 | -0.749393 |
| H | 0.478984  | -1.949683 | 0.749393  |
| H | 2.146177  | 1.400623  | -0.304634 |
| F | 1.540242  | 0.571291  | 1.431288  |
| F | -2.284209 | -1.154536 | 0.703555  |
| H | -0.806809 | -0.209127 | 1.697635  |
| H | -2.146177 | 1.400623  | 0.304634  |
| F | -1.540242 | 0.571291  | -1.431288 |
| F | 2.284209  | -1.154536 | -0.703555 |
| H | 0.806809  | -0.209127 | -1.697635 |

#### 4\_72

|   |           |           |           |
|---|-----------|-----------|-----------|
| C | -1.251081 | -0.323649 | -0.689572 |
| C | 0.000002  | -0.000004 | -1.507979 |
| C | 1.251081  | 0.323649  | -0.689572 |
| C | 1.251082  | -0.323648 | 0.689573  |
| C | 0.000000  | 0.000000  | 1.507979  |
| C | -1.251081 | 0.323650  | 0.689572  |
| H | 0.196345  | -0.864102 | -2.152938 |
| H | -0.196339 | 0.864084  | -2.152951 |
| H | 0.196342  | 0.864093  | 2.152946  |
| H | -0.196343 | -0.864094 | 2.152943  |
| H | -2.153915 | -0.026273 | -1.237218 |

|   |           |           |           |
|---|-----------|-----------|-----------|
| F | -1.338611 | -1.708049 | -0.475671 |
| H | 2.153917  | 0.026275  | -1.237217 |
| F | 1.338606  | 1.708050  | -0.475675 |
| H | -2.153916 | 0.026276  | 1.237217  |
| F | -1.338608 | 1.708050  | 0.475672  |
| F | 1.338610  | -1.708048 | 0.475674  |
| H | 2.153916  | -0.026273 | 1.237218  |

#### 4\_73

|   |           |           |           |
|---|-----------|-----------|-----------|
| C | 1.225498  | 0.654806  | 0.381494  |
| C | 0.000000  | 1.494191  | 0.000001  |
| C | -1.225497 | 0.654806  | -0.381494 |
| C | -1.225498 | -0.654806 | 0.381494  |
| C | 0.000000  | -1.494191 | 0.000001  |
| C | 1.225497  | -0.654806 | -0.381494 |
| H | -0.286452 | 2.139210  | 0.837929  |
| H | 0.286452  | 2.139211  | -0.837927 |
| H | -1.259208 | -0.438827 | 1.458388  |
| H | -0.286452 | -2.139212 | -0.837927 |
| H | 0.286452  | -2.139209 | 0.837930  |
| H | -1.259207 | 0.438827  | -1.458388 |
| F | -2.377267 | 1.380323  | -0.078857 |
| F | -2.377267 | -1.380323 | 0.078856  |
| F | 2.377267  | 1.380323  | 0.078856  |
| H | 1.259208  | 0.438827  | 1.458388  |
| H | 1.259206  | -0.438827 | -1.458388 |
| F | 2.377267  | -1.380323 | -0.078858 |

#### 5\_1

|   |           |           |           |
|---|-----------|-----------|-----------|
| C | 1.272196  | 0.671783  | -0.611255 |
| C | 1.286766  | -0.625828 | 0.195087  |
| C | 0.000000  | -0.911579 | 0.970178  |
| C | -1.286767 | -0.625828 | 0.195087  |
| C | -1.272196 | 0.671784  | -0.611255 |
| C | 0.000000  | 0.833838  | -1.428656 |
| H | 0.000000  | -1.971276 | 1.257233  |
| H | 2.126781  | -0.611780 | 0.900645  |
| H | 2.148574  | 0.670850  | -1.273017 |
| H | -2.126781 | -0.611780 | 0.900645  |
| H | -2.148573 | 0.670850  | -1.273017 |
| H | 0.000000  | 0.055983  | -2.203767 |
| H | 0.000000  | 1.811744  | -1.923813 |
| F | 1.421541  | 1.732578  | 0.282970  |
| F | 1.477005  | -1.671442 | -0.713525 |
| F | 0.000000  | -0.133338 | 2.123328  |
| F | -1.477005 | -1.671442 | -0.713525 |
| F | -1.421540 | 1.732578  | 0.282970  |

#### 5\_2

|   |           |           |           |
|---|-----------|-----------|-----------|
| C | 1.005315  | 1.114950  | -0.563859 |
| C | 1.456422  | -0.319346 | -0.281912 |
| C | 0.544195  | -1.101368 | 0.667882  |
| C | -0.949198 | -0.891438 | 0.410430  |
| C | -1.270447 | 0.587363  | 0.286529  |
| C | -0.484492 | 1.221503  | -0.850268 |
| H | 0.780992  | -2.168938 | 0.580039  |
| H | 2.468486  | -0.304229 | 0.141613  |

|   |           |           |           |
|---|-----------|-----------|-----------|
| H | 1.598186  | 1.505302  | -1.400525 |
| H | -1.534469 | -1.349866 | 1.217516  |
| H | -0.706769 | 0.696546  | -1.786991 |
| H | -0.763418 | 2.275293  | -0.960067 |
| F | 1.314368  | 1.880751  | 0.569723  |
| F | 1.488439  | -0.993601 | -1.502958 |
| F | 0.812630  | -0.685160 | 1.972909  |
| F | -1.268575 | -1.545041 | -0.779569 |
| F | -2.638893 | 0.743466  | 0.068300  |
| H | -1.025500 | 1.072176  | 1.239968  |

5\_3

|   |           |           |           |
|---|-----------|-----------|-----------|
| C | 1.570838  | 0.524287  | -0.150604 |
| C | 1.211544  | -0.924981 | 0.182361  |
| C | -0.267798 | -1.148054 | 0.504569  |
| C | -1.142045 | -0.511308 | -0.565225 |
| C | -0.861544 | 0.966405  | -0.790668 |
| C | 0.609940  | 1.162144  | -1.147041 |
| H | -0.470856 | -2.226628 | 0.543822  |
| H | 1.828296  | -1.278411 | 1.017158  |
| H | 0.794598  | 0.708589  | -2.130094 |
| H | 0.829445  | 2.233411  | -1.222579 |
| F | 1.507551  | -1.691540 | -0.955138 |
| F | -0.529843 | -0.617447 | 1.757889  |
| F | -1.184608 | 1.705100  | 0.342777  |
| H | -1.505443 | 1.330263  | -1.603233 |
| H | -0.920030 | -1.030594 | -1.508898 |
| F | -2.482320 | -0.718250 | -0.267716 |
| H | 2.589638  | 0.531544  | -0.561107 |
| F | 1.592414  | 1.246678  | 1.040474  |

5\_4

|   |           |           |           |
|---|-----------|-----------|-----------|
| C | -1.443621 | 0.907705  | -0.031140 |
| C | -1.450117 | -0.563330 | 0.389311  |
| C | -0.185950 | -1.320206 | -0.016802 |
| C | 1.073661  | -0.566371 | 0.388461  |
| C | 1.077748  | 0.836707  | -0.190381 |
| C | -0.138515 | 1.604951  | 0.315818  |
| H | -0.185537 | -2.318829 | 0.438237  |
| H | -2.331348 | -1.066885 | -0.025480 |
| H | -2.289694 | 1.409626  | 0.455581  |
| H | -0.070721 | 1.689025  | 1.408496  |
| H | -0.141017 | 2.617285  | -0.103755 |
| F | -1.655648 | 0.961179  | -1.412173 |
| F | -1.525785 | -0.594153 | 1.787284  |
| F | -0.208765 | -1.476986 | -1.400869 |
| H | 1.117325  | -0.503719 | 1.484444  |
| F | 2.183005  | -1.280455 | -0.045895 |
| F | 2.229017  | 1.500122  | 0.237872  |
| H | 1.105345  | 0.789409  | -1.285106 |

5\_5

|   |           |           |           |
|---|-----------|-----------|-----------|
| C | -0.620717 | -0.794392 | 1.276895  |
| C | 0.240200  | 0.471017  | 1.273010  |
| C | 1.067388  | 0.536414  | 0.000000  |
| C | 0.240200  | 0.471017  | -1.273010 |
| C | -0.620717 | -0.794392 | -1.276895 |
| C | -1.437794 | -0.937210 | 0.000000  |

|   |           |           |           |
|---|-----------|-----------|-----------|
| H | 0.905742  | 0.482318  | 2.145349  |
| H | -1.283837 | -0.770271 | 2.150792  |
| H | -2.196157 | -0.143573 | 0.000000  |
| H | -1.952627 | -1.905018 | 0.000000  |
| F | 0.243622  | -1.885302 | 1.433268  |
| F | -0.620717 | 1.561019  | 1.376867  |
| H | 0.905742  | 0.482318  | -2.145349 |
| H | -1.283837 | -0.770271 | -2.150792 |
| H | 1.724863  | -0.343510 | 0.000000  |
| F | 1.861829  | 1.676709  | 0.000000  |
| F | -0.620717 | 1.561019  | -1.376867 |
| F | 0.243622  | -1.885302 | -1.433268 |

#### 5\_6

|   |           |           |           |
|---|-----------|-----------|-----------|
| C | -0.248601 | 1.631081  | 0.312262  |
| C | -1.343888 | 0.569960  | 0.176196  |
| C | -0.900271 | -0.528823 | -0.781526 |
| C | 0.443208  | -1.144877 | -0.415002 |
| C | 1.483689  | -0.032398 | -0.376561 |
| C | 1.107554  | 1.029044  | 0.648208  |
| H | -2.269288 | 1.027060  | -0.196423 |
| H | -0.552263 | 2.365007  | 1.067903  |
| H | 1.051900  | 0.567219  | 1.641270  |
| H | 1.866969  | 1.818558  | 0.666155  |
| F | -0.170532 | 2.298096  | -0.924899 |
| F | -1.595243 | 0.064014  | 1.446191  |
| H | 0.718740  | -1.914378 | -1.148093 |
| H | -0.794498 | -0.064685 | -1.772566 |
| F | -1.876621 | -1.510865 | -0.869570 |
| F | 0.377502  | -1.761072 | 0.829133  |
| F | 2.728160  | -0.574035 | -0.065476 |
| H | 1.558891  | 0.412055  | -1.378115 |

#### 5\_7

|   |           |           |           |
|---|-----------|-----------|-----------|
| C | 1.699850  | 0.298668  | 0.037077  |
| C | 0.586316  | 1.327297  | -0.151525 |
| C | -0.718504 | 0.666619  | -0.570565 |
| C | -1.144622 | -0.356772 | 0.468496  |
| C | -0.074401 | -1.431766 | 0.620577  |
| C | 1.277270  | -0.823820 | 0.977901  |
| H | 0.875343  | 2.093927  | -0.880261 |
| H | 2.590248  | 0.805746  | 0.429808  |
| H | 1.220608  | -0.408603 | 1.992646  |
| H | 2.041873  | -1.609129 | 0.973111  |
| F | 2.022556  | -0.205726 | -1.225728 |
| F | 0.408962  | 1.956167  | 1.088396  |
| H | -0.583046 | 0.175254  | -1.541455 |
| F | -1.698610 | 1.643287  | -0.705047 |
| H | -0.391768 | -2.158009 | 1.380194  |
| H | -1.303146 | 0.143147  | 1.432705  |
| F | -2.342828 | -0.946641 | 0.088363  |
| F | 0.031525  | -2.127498 | -0.588040 |

#### 5\_8

|   |          |           |           |
|---|----------|-----------|-----------|
| C | 1.230818 | -1.276296 | -0.082294 |
| C | 1.523605 | 0.205849  | 0.144439  |
| C | 0.419157 | 1.067715  | -0.445020 |

|   |           |           |           |
|---|-----------|-----------|-----------|
| C | -0.944736 | 0.705519  | 0.123862  |
| C | -1.235147 | -0.772314 | -0.093044 |
| C | -0.131152 | -1.659044 | 0.470570  |
| H | 2.492986  | 0.491384  | -0.281381 |
| H | 2.024249  | -1.882722 | 0.370420  |
| H | -0.104568 | -1.546580 | 1.561716  |
| H | -0.346763 | -2.707967 | 0.238600  |
| F | 1.261283  | -1.496176 | -1.469346 |
| F | 1.583054  | 0.400856  | 1.527607  |
| H | 0.404550  | 0.926897  | -1.533844 |
| F | 0.694216  | 2.405037  | -0.189252 |
| H | -0.991301 | 0.951069  | 1.192181  |
| F | -1.912536 | 1.459640  | -0.533607 |
| F | -2.434670 | -1.092756 | 0.543295  |
| H | -1.376541 | -0.950060 | -1.167039 |

#### 5\_9

|   |           |           |           |
|---|-----------|-----------|-----------|
| C | 0.817614  | 1.192126  | -0.541092 |
| C | 1.203572  | -0.273865 | -0.688569 |
| C | 0.500229  | -1.204462 | 0.292291  |
| C | -1.015001 | -1.010661 | 0.193829  |
| C | -1.371165 | 0.452504  | 0.402083  |
| C | -0.697821 | 1.346725  | -0.631031 |
| H | 1.327473  | 1.776669  | -1.317657 |
| H | -1.041512 | 1.065242  | -1.633962 |
| H | -0.969848 | 2.392151  | -0.449788 |
| F | 1.253749  | 1.685100  | 0.691617  |
| H | 0.898785  | -0.587074 | -1.697113 |
| H | 0.767598  | -2.244139 | 0.065565  |
| H | -1.536822 | -1.644741 | 0.920375  |
| F | 2.578999  | -0.430667 | -0.584764 |
| F | 0.878990  | -0.940820 | 1.604740  |
| F | -1.402031 | -1.416269 | -1.089218 |
| F | -2.755751 | 0.601762  | 0.325820  |
| H | -1.055849 | 0.735726  | 1.413765  |

#### 5\_10

|   |           |           |           |
|---|-----------|-----------|-----------|
| C | 0.950560  | 0.363678  | -1.280752 |
| C | -0.544721 | 0.654313  | -1.233176 |
| C | -1.238025 | 0.085888  | 0.000000  |
| C | -0.544721 | 0.654313  | 1.233176  |
| C | 0.950560  | 0.363678  | 1.280752  |
| C | 1.626237  | 0.854006  | 0.000000  |
| H | 1.379924  | 0.872725  | -2.154851 |
| H | 1.625016  | 1.953184  | 0.000000  |
| H | 2.670539  | 0.521678  | 0.000000  |
| F | 1.176745  | -0.995624 | -1.451301 |
| H | -0.658813 | 1.749318  | -1.200347 |
| H | -2.295678 | 0.384008  | 0.000000  |
| F | -1.168948 | 0.201242  | -2.384893 |
| F | -1.197977 | -1.295480 | 0.000000  |
| H | -0.658813 | 1.749318  | 1.200347  |
| H | 1.379924  | 0.872725  | 2.154851  |
| F | -1.168948 | 0.201242  | 2.384893  |
| F | 1.176745  | -0.995624 | 1.451301  |

#### 5\_11

|   |          |           |           |
|---|----------|-----------|-----------|
| C | 1.121775 | 1.211365  | -0.179765 |
| C | 1.310557 | -0.182564 | -0.767141 |
| C | 0.330674 | -1.207245 | -0.210658 |

|   |           |           |           |
|---|-----------|-----------|-----------|
| C | -1.095095 | -0.721142 | -0.448853 |
| C | -1.314342 | 0.636832  | 0.197078  |
| C | -0.324603 | 1.657128  | -0.360363 |
| H | 1.813105  | 1.905795  | -0.674843 |
| H | -0.530260 | 1.798114  | -1.430588 |
| H | -0.472676 | 2.620620  | 0.139390  |
| F | 1.439341  | 1.215710  | 1.177229  |
| H | 1.128961  | -0.103346 | -1.850247 |
| H | 0.487233  | -2.180722 | -0.693433 |
| F | 2.613404  | -0.620367 | -0.586517 |
| F | 0.530346  | -1.381575 | 1.152838  |
| H | -1.281008 | -0.638371 | -1.530030 |
| F | -1.985424 | -1.653765 | 0.062612  |
| F | -2.607635 | 1.071968  | -0.098139 |
| H | -1.229442 | 0.543927  | 1.285755  |

5\_12

|   |           |           |           |
|---|-----------|-----------|-----------|
| C | 0.559843  | -1.427411 | 0.452971  |
| C | 1.253758  | -0.070597 | 0.500059  |
| C | 0.668813  | 0.868607  | -0.544494 |
| C | -0.831292 | 1.019512  | -0.325575 |
| C | -1.501371 | -0.342740 | -0.423963 |
| C | -0.947291 | -1.295092 | 0.629265  |
| H | 1.002630  | -2.092457 | 1.204151  |
| H | -1.173970 | -0.900490 | 1.626982  |
| H | -1.416172 | -2.279506 | 0.525755  |
| F | 0.808296  | -2.004309 | -0.805018 |
| H | 1.127125  | 0.370451  | 1.496868  |
| F | 2.613340  | -0.237935 | 0.270428  |
| H | -1.261138 | 1.729307  | -1.042952 |
| H | 0.864065  | 0.469286  | -1.547983 |
| F | 1.275357  | 2.114194  | -0.451176 |
| F | -1.046182 | 1.538055  | 0.955450  |
| F | -2.875798 | -0.194910 | -0.254292 |
| H | -1.332412 | -0.746126 | -1.430933 |

5\_13

|   |           |           |           |
|---|-----------|-----------|-----------|
| C | 1.270399  | -1.028997 | 0.384163  |
| C | 1.241485  | 0.492240  | 0.433288  |
| C | 0.000000  | 1.061258  | -0.238104 |
| C | -1.241485 | 0.492240  | 0.433288  |
| C | -1.270399 | -1.028997 | 0.384163  |
| C | 0.000000  | -1.619440 | 0.988733  |
| H | 2.160898  | -1.390755 | 0.914921  |
| H | 0.000000  | -1.430584 | 2.071436  |
| H | 0.000000  | -2.704705 | 0.837065  |
| F | 1.393273  | -1.433662 | -0.945033 |
| H | 1.250392  | 0.813097  | 1.485920  |
| F | 2.380581  | 1.003064  | -0.170658 |
| H | 0.000000  | 0.842948  | -1.311845 |
| F | 0.000000  | 2.443180  | -0.069899 |
| H | -1.250392 | 0.813097  | 1.485920  |
| F | -2.380581 | 1.003064  | -0.170658 |
| F | -1.393273 | -1.433662 | -0.945033 |
| H | -2.160898 | -1.390755 | 0.914921  |

5\_14

|   |           |           |           |
|---|-----------|-----------|-----------|
| C | -0.901351 | -1.437010 | -0.186078 |
| C | -1.373796 | -0.029980 | -0.514561 |
| C | -0.516334 | 1.018662  | 0.176747  |
| C | 0.961889  | 0.828451  | -0.139671 |
| C | 1.431889  | -0.594287 | 0.118655  |
| C | 0.552407  | -1.614340 | -0.594987 |
| H | -1.557999 | -2.171092 | -0.668874 |
| H | 0.647729  | -1.480040 | -1.681041 |
| H | 0.891203  | -2.626163 | -0.347506 |
| F | -1.004732 | -1.632344 | 1.199408  |
| H | -1.320450 | 0.118157  | -1.602834 |
| F | -2.697926 | 0.128295  | -0.130103 |
| H | -0.679682 | 0.980369  | 1.260569  |
| F | -0.903292 | 2.278636  | -0.270537 |
| F | 2.739956  | -0.720795 | -0.350405 |
| H | 1.449115  | -0.778077 | 1.199792  |
| H | 1.147775  | 1.089508  | -1.191198 |
| F | 1.698670  | 1.706025  | 0.648356  |

5\_15

|   |           |           |           |
|---|-----------|-----------|-----------|
| C | 0.723583  | 0.499611  | 1.227784  |
| C | -0.678091 | -0.089516 | 1.283233  |
| C | -1.454597 | 0.222620  | 0.000000  |
| C | -0.678091 | -0.089516 | -1.283233 |
| C | 0.723583  | 0.499611  | -1.227784 |
| C | 1.484462  | 0.019412  | 0.000000  |
| H | -2.397647 | -0.336373 | 0.000000  |
| H | -1.224963 | 0.307039  | 2.148266  |
| H | -1.224963 | 0.307039  | -2.148266 |
| H | 1.547786  | -1.074278 | 0.000000  |
| H | 2.495859  | 0.440330  | 0.000000  |
| F | -0.604540 | -1.472401 | 1.414545  |
| F | -1.739216 | 1.594209  | 0.000000  |
| F | -0.604540 | -1.472401 | -1.414545 |
| F | 1.409239  | 0.163845  | -2.391658 |
| H | 0.623594  | 1.594513  | -1.208040 |
| H | 0.623594  | 1.594513  | 1.208040  |
| F | 1.409239  | 0.163845  | 2.391658  |

5\_16

|   |           |           |           |
|---|-----------|-----------|-----------|
| C | -1.430309 | 0.378003  | -0.558448 |
| C | -1.202486 | -0.909394 | 0.219532  |
| C | 0.240351  | -1.375988 | 0.026976  |
| C | 1.222790  | -0.289582 | 0.446741  |
| C | 0.977072  | 1.004907  | -0.310824 |
| C | -0.464000 | 1.469691  | -0.121400 |
| H | 0.435477  | -2.295808 | 0.590775  |
| H | -1.911104 | -1.684369 | -0.096284 |
| H | -0.633343 | 1.699520  | 0.937457  |
| H | -0.638762 | 2.378716  | -0.707009 |
| F | -1.387560 | -0.682236 | 1.585518  |
| F | 0.406769  | -1.658710 | -1.333254 |
| H | 1.109014  | -0.103113 | 1.522726  |
| F | 2.516687  | -0.743127 | 0.219790  |
| F | 1.837068  | 1.985586  | 0.182468  |
| H | 1.219454  | 0.856234  | -1.371102 |
| F | -2.744028 | 0.802155  | -0.373088 |
| H | -1.301665 | 0.149983  | -1.624935 |

5\_17

|   |           |           |           |
|---|-----------|-----------|-----------|
| C | 1.234987  | -0.928854 | -0.477412 |
| C | 1.273783  | 0.569307  | -0.192330 |
| C | 0.000000  | 1.200804  | -0.745975 |
| C | -1.273783 | 0.569307  | -0.192330 |
| C | -1.234987 | -0.928854 | -0.477412 |
| C | 0.000000  | -1.579414 | 0.132374  |
| H | 2.153836  | 1.030304  | -0.660091 |
| H | 0.000000  | -1.427452 | 1.217436  |
| H | 0.000000  | -2.653511 | -0.082805 |
| F | 1.369846  | 0.777535  | 1.175151  |
| H | -2.153836 | 1.030304  | -0.660091 |
| H | 0.000000  | 1.047612  | -1.836437 |
| F | 0.000000  | 2.566907  | -0.513218 |
| F | -1.369846 | 0.777535  | 1.175151  |
| F | -2.389866 | -1.522129 | 0.019212  |
| H | -1.240470 | -1.070259 | -1.569551 |
| F | 2.389866  | -1.522129 | 0.019212  |
| H | 1.240470  | -1.070258 | -1.569551 |

5\_18

|   |           |           |           |
|---|-----------|-----------|-----------|
| C | 1.509398  | -0.432246 | -0.589127 |
| C | 1.097086  | 0.948951  | -0.102518 |
| C | -0.360644 | 1.184316  | -0.468411 |
| C | -1.265529 | 0.130262  | 0.155792  |
| C | -0.808127 | -1.272071 | -0.224692 |
| C | 0.666686  | -1.507184 | 0.080920  |
| H | 1.736965  | 1.731430  | -0.529042 |
| H | 0.827347  | -1.464975 | 1.164297  |
| H | 0.963003  | -2.498221 | -0.279310 |
| F | 1.229049  | 1.003551  | 1.285367  |
| H | -0.472621 | 1.154034  | -1.562019 |
| F | -0.750470 | 2.445468  | -0.041568 |
| H | -1.279735 | 0.242800  | 1.246689  |
| F | -2.560448 | 0.324993  | -0.316902 |
| F | -1.572831 | -2.198563 | 0.480771  |
| H | -1.018879 | -1.425126 | -1.293437 |
| F | 2.857214  | -0.640690 | -0.316163 |
| H | 1.388076  | -0.464946 | -1.682500 |

5\_19

|   |           |           |           |
|---|-----------|-----------|-----------|
| C | 0.793820  | 0.319541  | 1.269620  |
| C | -0.472568 | -0.520646 | 1.249138  |
| C | -1.286062 | -0.213953 | 0.000000  |
| C | -0.472568 | -0.520646 | -1.249138 |
| C | 0.793820  | 0.319541  | -1.269620 |
| C | 1.606011  | 0.082959  | 0.000000  |
| H | 1.957380  | -0.957906 | 0.000000  |
| H | 2.487542  | 0.733060  | 0.000000  |
| H | -0.200316 | -1.585954 | 1.263267  |
| H | -2.227770 | -0.776274 | 0.000000  |
| F | -1.244458 | -0.263261 | 2.373359  |
| F | -1.606911 | 1.147079  | 0.000000  |
| H | -0.200316 | -1.585954 | -1.263267 |
| F | -1.244458 | -0.263261 | -2.373359 |
| F | 1.567919  | -0.053497 | -2.368152 |
| H | 0.524337  | 1.375094  | -1.395725 |
| H | 0.524337  | 1.375094  | 1.395725  |
| F | 1.567919  | -0.053497 | 2.368152  |

5\_20

|   |           |           |           |
|---|-----------|-----------|-----------|
| C | 0.472365  | -0.896818 | 1.248772  |
| C | -0.292095 | 0.415809  | 1.271090  |
| C | -0.058284 | 1.220877  | 0.000000  |
| C | -0.292095 | 0.415809  | -1.271090 |
| C | 0.472365  | -0.896818 | -1.248772 |
| C | 0.137702  | -1.698180 | 0.000000  |
| H | -0.933335 | -1.940943 | 0.000000  |
| H | 0.699151  | -2.638793 | 0.000000  |
| H | -1.364989 | 0.214670  | 1.395804  |
| F | 0.126381  | 1.179089  | 2.355220  |
| H | 0.968196  | 1.612865  | 0.000000  |
| F | -0.921422 | 2.311211  | 0.000000  |
| F | 0.126381  | -1.637635 | -2.376290 |
| H | 1.549656  | -0.686803 | -1.313000 |
| H | -1.364989 | 0.214670  | -1.395804 |
| F | 0.126381  | 1.179089  | -2.355220 |
| F | 0.126381  | -1.637635 | 2.376290  |
| H | 1.549656  | -0.686803 | 1.313000  |

5\_21

|   |           |           |           |
|---|-----------|-----------|-----------|
| C | 0.587559  | -1.523423 | 0.133098  |
| C | 1.483337  | -0.283366 | 0.166751  |
| C | 0.728577  | 1.001581  | -0.167111 |
| C | -0.746838 | 0.903469  | 0.194531  |
| C | -1.431417 | -0.198252 | -0.612000 |
| C | -0.507901 | -1.384918 | -0.906765 |
| H | 1.937809  | -0.189585 | 1.160090  |
| H | -0.021525 | -1.243068 | -1.881548 |
| H | -0.869233 | 0.706722  | 1.265868  |
| H | -1.796834 | 0.243729  | -1.547969 |
| H | -1.114588 | -2.295466 | -0.961798 |
| H | 1.213745  | -2.405825 | -0.045784 |
| H | 0.829767  | 1.209112  | -1.241583 |
| F | 0.007120  | -1.655929 | 1.402601  |
| F | 2.502265  | -0.463705 | -0.773104 |
| F | 1.304075  | 2.064846  | 0.519826  |
| F | -1.356395 | 2.122607  | -0.089100 |
| F | -2.552514 | -0.636282 | 0.095522  |

5\_22

|   |           |           |           |
|---|-----------|-----------|-----------|
| C | -1.608756 | -0.293725 | -0.439528 |
| C | -1.081414 | 0.615664  | 0.665286  |
| C | 0.395552  | 1.000335  | 0.478689  |
| C | 1.107322  | 0.145139  | -0.559765 |
| C | 0.735526  | -1.317100 | -0.389997 |
| C | -0.758827 | -1.544188 | -0.641852 |
| H | -1.672472 | 1.538053  | 0.706903  |
| H | -1.091270 | -2.328860 | 0.046755  |
| H | 0.829594  | 0.479211  | -1.566420 |
| H | -0.926718 | -1.896524 | -1.666326 |
| H | -2.655357 | -0.555218 | -0.243308 |
| H | 0.904313  | 0.888744  | 1.442734  |
| F | -1.586716 | 0.475897  | -1.617687 |
| F | -1.239639 | -0.070936 | 1.869854  |
| F | 0.471316  | 2.337574  | 0.090940  |
| F | 2.483293  | 0.302824  | -0.420407 |
| F | 1.040583  | -1.692586 | 0.927355  |
| H | 1.355951  | -1.937108 | -1.047832 |

5\_23

|   |           |           |           |
|---|-----------|-----------|-----------|
| C | -0.129991 | 1.502275  | 0.074365  |
| C | -1.286494 | 0.493641  | 0.196374  |
| C | -0.951463 | -0.864929 | -0.405481 |
| C | 0.473550  | -1.259607 | -0.066268 |
| C | 1.421583  | -0.335260 | -0.843532 |
| C | 0.892485  | 1.100403  | -0.977955 |
| H | -1.551543 | 0.373255  | 1.251960  |
| H | 0.403913  | 1.207519  | -1.956268 |
| H | 1.741976  | 1.792287  | -0.955698 |
| H | -0.570630 | 2.475256  | -0.178110 |
| H | -1.064265 | -0.810393 | -1.498231 |
| F | 0.494597  | 1.637036  | 1.314003  |
| F | -2.394248 | 1.006757  | -0.487012 |
| F | -1.845437 | -1.822394 | 0.059618  |
| H | 1.552766  | -0.763564 | -1.847174 |
| F | 2.667891  | -0.347394 | -0.230131 |
| F | 0.667601  | -1.116354 | 1.302761  |
| H | 0.656123  | -2.312367 | -0.314654 |

5\_24

|   |           |           |           |
|---|-----------|-----------|-----------|
| C | -0.426565 | 1.517414  | 0.002278  |
| C | -1.354053 | 0.290781  | -0.030515 |
| C | -0.610627 | -0.988996 | -0.382540 |
| C | 0.725221  | -1.056674 | 0.328624  |
| C | 1.646526  | 0.088983  | -0.118027 |
| C | 0.890648  | 1.276289  | -0.716149 |
| H | -1.842691 | 0.181177  | 0.943619  |
| H | 0.672902  | 1.057137  | -1.769976 |
| H | 1.508638  | 2.180041  | -0.682221 |
| H | -0.970127 | 2.359178  | -0.443333 |
| H | -0.432622 | -1.015312 | -1.466681 |
| F | -0.156465 | 1.845446  | 1.336784  |
| F | -2.336030 | 0.506788  | -1.001777 |
| F | -1.388993 | -2.093515 | -0.057078 |
| F | 0.511014  | -0.951381 | 1.704688  |
| H | 1.216205  | -2.017030 | 0.132167  |
| H | 2.239201  | 0.389214  | 0.753006  |
| F | 2.523985  | -0.407470 | -1.090241 |

5\_25

|   |           |           |           |
|---|-----------|-----------|-----------|
| C | 0.960062  | 1.262648  | 0.106399  |
| C | 1.467187  | -0.054660 | -0.504533 |
| C | 0.470263  | -1.203218 | -0.341859 |
| C | -0.926218 | -0.649760 | -0.557551 |
| C | -1.321565 | 0.255040  | 0.605746  |
| C | -0.129992 | 1.057305  | 1.144372  |
| H | 1.630959  | 0.120484  | -1.575615 |
| H | 0.313227  | 0.518991  | 1.990116  |
| H | -0.493944 | 2.027549  | 1.500401  |
| H | 1.815940  | 1.807964  | 0.521596  |
| F | 0.437355  | 2.030168  | -0.949851 |
| F | 2.677841  | -0.409986 | 0.075765  |
| F | -2.321262 | 1.126185  | 0.161715  |
| F | -1.839056 | -1.691784 | -0.687336 |
| H | -0.948103 | -0.062789 | -1.485236 |
| H | -1.760732 | -0.363899 | 1.396214  |
| H | 0.684457  | -2.023404 | -1.037277 |
| F | 0.560652  | -1.724475 | 0.952413  |

5\_26

|   |           |           |           |
|---|-----------|-----------|-----------|
| C | -1.385000 | 0.924127  | -0.155451 |
| C | -1.426176 | -0.527938 | 0.353598  |
| C | -0.046676 | -1.191969 | 0.369640  |
| C | 0.940686  | -0.145958 | 0.854676  |
| C | 1.152620  | 0.968452  | -0.182736 |
| C | -0.141178 | 1.253064  | -0.960280 |
| H | -1.819735 | -0.505548 | 1.378028  |
| H | -0.134662 | 0.610118  | -1.848149 |
| H | -0.177632 | 2.298154  | -1.285960 |
| H | -2.298467 | 1.115438  | -0.730068 |
| F | -1.415409 | 1.764893  | 0.978061  |
| F | -2.291545 | -1.274889 | -0.434104 |
| F | 2.151817  | -0.723582 | 1.199220  |
| H | 0.518515  | 0.313272  | 1.760165  |
| H | -0.036529 | -2.075780 | 1.019443  |
| F | 0.286321  | -1.615254 | -0.913738 |
| F | 2.142510  | 0.593528  | -1.085458 |
| H | 1.519612  | 1.863410  | 0.334021  |

5\_27

|   |           |           |           |
|---|-----------|-----------|-----------|
| C | 1.148108  | 1.014328  | 0.252100  |
| C | 1.210096  | -0.346007 | -0.439082 |
| C | 0.216645  | -1.316741 | 0.164265  |
| C | -1.218702 | -0.827152 | -0.067095 |
| C | -1.310655 | 0.693905  | -0.139036 |
| C | -0.260772 | 1.342016  | 0.751618  |
| H | 0.960055  | -0.213994 | -1.501174 |
| H | -0.380393 | 0.977305  | 1.778273  |
| H | -0.392290 | 2.429326  | 0.751830  |
| H | 1.873007  | 1.033593  | 1.073291  |
| F | 1.545326  | 1.984581  | -0.679613 |
| F | 2.498633  | -0.863234 | -0.369011 |
| H | 0.339588  | -2.319498 | -0.260938 |
| F | 0.435758  | -1.399649 | 1.545043  |
| F | -1.679516 | -1.379722 | -1.263843 |
| H | -1.849336 | -1.191392 | 0.753051  |
| H | -1.184770 | 1.009618  | -1.183414 |
| F | -2.586221 | 1.092797  | 0.262142  |

5\_28

|   |           |           |           |
|---|-----------|-----------|-----------|
| C | -1.055297 | -1.211704 | -0.219505 |
| C | -1.010025 | -0.086805 | 0.798033  |
| C | -0.107276 | 1.074448  | 0.340250  |
| C | 1.052456  | 0.558813  | -0.512186 |
| C | 1.467233  | -0.842872 | -0.108877 |
| C | 0.333976  | -1.841153 | -0.361463 |
| H | 0.452516  | -2.665930 | 0.350602  |
| H | 0.726409  | 0.544844  | -1.559491 |
| H | 0.412873  | -2.252441 | -1.374228 |
| H | -1.810879 | -1.953090 | 0.066526  |
| H | 0.292339  | 1.603082  | 1.213610  |
| F | -1.445242 | -0.691595 | -1.463019 |
| F | -0.839062 | 1.987360  | -0.405727 |
| F | 2.135502  | 1.426663  | -0.406629 |
| F | -2.283038 | 0.384293  | 1.073457  |
| H | -0.591932 | -0.498447 | 1.725416  |
| H | 2.386899  | -1.131428 | -0.630555 |
| F | 1.770215  | -0.834604 | 1.267541  |

5\_29

|   |           |           |           |
|---|-----------|-----------|-----------|
| C | -1.095377 | -1.124646 | 0.430566  |
| C | -1.541247 | 0.326540  | 0.238290  |
| C | -0.370813 | 1.278865  | -0.049341 |
| C | 0.835788  | 0.541916  | -0.595409 |
| C | 1.354696  | -0.468233 | 0.422542  |
| C | 0.217639  | -1.149203 | 1.200139  |
| H | 0.070037  | -0.631257 | 2.156315  |
| H | 0.551225  | 0.017551  | -1.514518 |
| H | 2.035984  | 0.047152  | 1.109324  |
| H | 0.514796  | -2.181938 | 1.411487  |
| H | -1.881846 | -1.698722 | 0.935941  |
| F | -0.902879 | -1.717501 | -0.821820 |
| F | 1.839043  | 1.454635  | -0.909774 |
| F | 2.104790  | -1.433575 | -0.254332 |
| F | -2.476926 | 0.405322  | -0.784428 |
| H | -2.010145 | 0.671963  | 1.168662  |
| H | -0.692045 | 2.071995  | -0.733820 |
| F | -0.007597 | 1.876877  | 1.168787  |

5\_30

|   |           |           |           |
|---|-----------|-----------|-----------|
| C | -1.342826 | 0.984413  | -0.345534 |
| C | -1.379764 | -0.538864 | -0.499531 |
| C | -0.060630 | -1.225328 | -0.109455 |
| C | 0.742804  | -0.346272 | 0.827350  |
| C | 1.129362  | 0.995904  | 0.187866  |
| C | 0.025458  | 1.507750  | -0.753128 |
| H | 0.259090  | 1.134332  | -1.758433 |
| H | 0.108690  | -0.140501 | 1.698817  |
| H | 0.020236  | 2.602079  | -0.784651 |
| H | -2.150682 | 1.439263  | -0.930962 |
| F | -1.578329 | 1.329988  | 0.994753  |
| F | 1.877003  | -1.009430 | 1.269540  |
| F | -2.426055 | -1.062068 | 0.249782  |
| H | -1.556933 | -0.770541 | -1.557724 |
| H | -0.271784 | -2.196503 | 0.353615  |
| F | 0.664935  | -1.451104 | -1.282842 |
| F | 2.302678  | 0.853520  | -0.547972 |
| H | 1.342873  | 1.718110  | 0.984578  |

5\_31

|   |           |           |           |
|---|-----------|-----------|-----------|
| C | 0.619426  | -1.409294 | -0.307508 |
| C | 1.294012  | -0.073319 | -0.567275 |
| C | 0.695478  | 1.034355  | 0.293169  |
| C | -0.830801 | 0.919380  | 0.438000  |
| C | -1.402426 | 0.090302  | -0.695741 |
| C | -0.871256 | -1.343547 | -0.672138 |
| H | -1.049757 | -1.812719 | -1.645955 |
| H | -1.424444 | -1.905901 | 0.087843  |
| H | 1.137737  | -2.197342 | -0.866684 |
| F | 0.765106  | -1.714703 | 1.050009  |
| F | 2.659061  | -0.165407 | -0.323112 |
| H | 1.167476  | 0.189305  | -1.627246 |
| H | 1.148469  | 1.010634  | 1.290203  |
| F | 0.991155  | 2.261410  | -0.306801 |
| H | -1.137845 | 0.596185  | -1.635918 |
| F | -2.793215 | 0.071301  | -0.626367 |
| F | -1.133574 | 0.312525  | 1.653521  |
| H | -1.265031 | 1.926435  | 0.441469  |

5\_32

|   |           |           |           |
|---|-----------|-----------|-----------|
| C | 0.861172  | -1.098255 | -0.738973 |
| C | 1.356336  | 0.338793  | -0.575671 |
| C | 0.329558  | 1.285112  | 0.064058  |
| C | -0.792860 | 0.605235  | 0.841273  |
| C | -1.425143 | -0.588973 | 0.108110  |
| C | -0.617937 | -1.073395 | -1.096510 |
| H | -0.777257 | -0.380856 | -1.933224 |
| H | -0.961333 | -2.068131 | -1.399763 |
| H | 1.464576  | -1.616636 | -1.494184 |
| F | 1.021719  | -1.798278 | 0.459965  |
| F | 2.541068  | 0.360190  | 0.145734  |
| H | 1.555819  | 0.736785  | -1.579874 |
| H | 0.853033  | 2.000895  | 0.708760  |
| F | -0.295799 | 1.990565  | -0.976130 |
| F | -0.263080 | 0.179762  | 2.058515  |
| H | -1.578898 | 1.343013  | 1.043057  |
| H | -1.541310 | -1.392693 | 0.843061  |
| F | -2.701840 | -0.224848 | -0.332702 |

5\_33

|   |           |           |           |
|---|-----------|-----------|-----------|
| C | -1.253013 | -0.645813 | -0.455937 |
| C | -1.117954 | 0.857194  | -0.226992 |
| C | 0.326142  | 1.235696  | 0.132830  |
| C | 1.335166  | 0.145748  | -0.198253 |
| C | 0.986900  | -1.196754 | 0.451326  |
| C | -0.516548 | -1.399232 | 0.638008  |
| H | -1.440633 | 1.425292  | -1.107398 |
| H | -0.836666 | -1.021352 | 1.617054  |
| H | 1.398608  | 0.013493  | -1.286332 |
| H | 1.521763  | -1.273590 | 1.405315  |
| H | -0.737406 | -2.470737 | 0.590862  |
| H | 0.365078  | 1.450540  | 1.208882  |
| F | -1.942254 | 1.221991  | 0.838213  |
| F | 0.687523  | 2.396307  | -0.545147 |
| F | 2.590622  | 0.555797  | 0.241629  |
| F | 1.483014  | -2.207996 | -0.383609 |
| F | -2.597532 | -0.989379 | -0.488359 |
| H | -0.827255 | -0.895165 | -1.438816 |

5\_34

|   |           |           |           |
|---|-----------|-----------|-----------|
| C | 0.642127  | -1.071760 | 0.501184  |
| C | 1.292117  | 0.292868  | 0.233122  |
| C | 0.293114  | 1.262480  | -0.408440 |
| C | -1.143568 | 0.905643  | -0.084150 |
| C | -1.462341 | -0.445073 | -0.740466 |
| C | -0.306908 | -1.450689 | -0.627435 |
| H | 1.697154  | 0.728751  | 1.153306  |
| H | 0.262651  | -1.480084 | -1.565176 |
| H | -0.724961 | -2.447591 | -0.452644 |
| H | 0.429436  | 1.203394  | -1.497700 |
| F | 2.350817  | 0.125675  | -0.660899 |
| F | 0.567472  | 2.567848  | -0.017680 |
| H | -1.695066 | -0.259336 | -1.797372 |
| F | -2.613829 | -0.958392 | -0.149442 |
| F | -1.291470 | 0.812108  | 1.301770  |
| H | -1.831107 | 1.687198  | -0.428280 |
| F | 1.639145  | -2.032583 | 0.625213  |
| H | 0.105431  | -1.025046 | 1.454315  |

5\_35

|   |           |           |           |
|---|-----------|-----------|-----------|
| C | 1.115264  | -0.685799 | 0.592408  |
| C | 1.089963  | 0.744785  | 0.039835  |
| C | -0.321453 | 1.122680  | -0.418142 |
| C | -1.400265 | 0.334303  | 0.291074  |
| C | -1.257543 | -1.165638 | -0.008029 |
| C | 0.198273  | -1.596694 | -0.214494 |
| H | 1.450127  | 1.463264  | 0.785225  |
| H | 0.448562  | -1.510707 | -1.279213 |
| H | 0.342425  | -2.638420 | 0.089521  |
| H | -0.395158 | 0.893633  | -1.490248 |
| F | 1.932715  | 0.821270  | -1.068503 |
| F | -0.531220 | 2.487657  | -0.256436 |
| F | -1.282249 | 0.517101  | 1.676266  |
| H | -2.394878 | 0.680794  | -0.011601 |
| H | -1.723988 | -1.709403 | 0.822398  |
| F | -1.989033 | -1.441104 | -1.167507 |
| H | 0.797401  | -0.656279 | 1.641723  |
| F | 2.417573  | -1.167670 | 0.565767  |

5\_36

|   |           |           |           |
|---|-----------|-----------|-----------|
| C | 1.119253  | 0.885281  | -0.368205 |
| C | 1.187814  | -0.628706 | -0.646628 |
| C | -0.142357 | -1.319271 | -0.281937 |
| C | -1.287039 | -0.350933 | -0.512076 |
| C | -1.218154 | 0.813219  | 0.478203  |
| C | 0.225208  | 1.194231  | 0.821202  |
| H | 1.407801  | -0.800779 | -1.708907 |
| H | 0.566573  | 0.628615  | 1.694815  |
| H | 0.259482  | 2.264178  | 1.053449  |
| F | 2.202979  | -1.207010 | 0.092660  |
| F | -1.855831 | 1.911365  | -0.119218 |
| F | -2.504536 | -1.011423 | -0.391967 |
| H | -1.230560 | 0.048460  | -1.534702 |
| H | -1.788443 | 0.551966  | 1.375933  |
| H | -0.285151 | -2.243831 | -0.853817 |
| F | -0.128756 | -1.668372 | 1.068842  |
| F | 2.402273  | 1.376140  | -0.173319 |
| H | 0.716795  | 1.382166  | -1.263103 |

5\_37

|   |           |           |           |
|---|-----------|-----------|-----------|
| C | -0.808514 | 1.201892  | 0.235776  |
| C | -1.250691 | -0.097501 | -0.436077 |
| C | -0.038408 | -1.003206 | -0.710403 |
| C | 1.030015  | -0.866238 | 0.353135  |
| C | 1.624087  | 0.547213  | 0.297680  |
| C | 0.608289  | 1.597605  | -0.165713 |
| H | 0.666376  | 1.681197  | -1.258643 |
| H | 0.844698  | 2.579174  | 0.257746  |
| H | 0.420101  | -0.688234 | -1.659057 |
| F | -0.445332 | -2.317948 | -0.855942 |
| F | -2.163707 | -0.752041 | 0.377782  |
| H | -1.759734 | 0.137738  | -1.379902 |
| H | 1.820489  | -1.612674 | 0.212920  |
| F | 0.473741  | -1.047007 | 1.622108  |
| F | 2.696480  | 0.531704  | -0.600999 |
| H | 2.021200  | 0.779863  | 1.292758  |
| H | -0.887851 | 1.064112  | 1.320775  |
| F | -1.684954 | 2.227540  | -0.124392 |

5\_38

|   |           |           |           |
|---|-----------|-----------|-----------|
| C | 1.402538  | 0.662553  | -0.355544 |
| C | 1.259665  | -0.726685 | 0.258803  |
| C | -0.205843 | -1.164853 | 0.392756  |
| C | -1.033846 | -0.492084 | -0.683240 |
| C | -1.090784 | 1.032635  | -0.510910 |
| C | 0.239562  | 1.564305  | 0.039709  |
| H | 0.157520  | 1.583816  | 1.132844  |
| H | -0.538996 | -0.709991 | -1.642456 |
| H | 0.433847  | 2.582996  | -0.311366 |
| F | -2.311805 | -1.020569 | -0.743317 |
| F | 1.924634  | -1.655051 | -0.546071 |
| H | 1.720001  | -0.732085 | 1.254169  |
| H | -0.270617 | -2.256262 | 0.307465  |
| F | -0.663061 | -0.795605 | 1.657175  |
| F | -2.112195 | 1.375472  | 0.366615  |
| H | -1.341364 | 1.486393  | -1.478674 |
| H | 1.478600  | 0.561414  | -1.447159 |
| F | 2.599456  | 1.232251  | 0.080680  |

5\_39

|   |           |           |           |
|---|-----------|-----------|-----------|
| C | 0.825885  | 1.046559  | -0.146909 |
| C | 1.348176  | -0.364344 | 0.086253  |
| C | 0.226245  | -1.395565 | 0.286785  |
| C | -1.107633 | -0.918878 | -0.275821 |
| C | -1.550875 | 0.357736  | 0.445969  |
| C | -0.385508 | 1.310747  | 0.738107  |
| H | -0.075891 | 1.195758  | 1.784481  |
| H | -0.727222 | 2.341625  | 0.597602  |
| F | 2.144165  | -0.763201 | -0.984192 |
| H | 1.966171  | -0.363848 | 0.993828  |
| H | 0.533069  | -2.344108 | -0.167958 |
| F | 0.037441  | -1.596750 | 1.661663  |
| H | -2.039050 | 0.068822  | 1.383737  |
| F | -2.511971 | 0.988777  | -0.343915 |
| F | -0.894222 | -0.651878 | -1.628488 |
| H | -1.878804 | -1.695469 | -0.208671 |
| F | 1.834567  | 1.955817  | 0.185871  |
| H | 0.594159  | 1.184802  | -1.207772 |

5\_40

|   |           |           |           |
|---|-----------|-----------|-----------|
| C | 1.057493  | 0.901889  | -0.311322 |
| C | 1.256339  | -0.419272 | 0.414603  |
| C | -0.049921 | -1.212557 | 0.567549  |
| C | -1.110970 | -0.826101 | -0.455456 |
| C | -1.419702 | 0.677663  | -0.470736 |
| C | -0.276103 | 1.521818  | 0.087134  |
| H | -0.357646 | 1.549230  | 1.180606  |
| H | -0.331209 | 2.547240  | -0.292990 |
| F | 2.188773  | -1.200960 | -0.263169 |
| H | 1.643947  | -0.213142 | 1.420840  |
| H | 0.177013  | -2.283343 | 0.502312  |
| F | -0.590816 | -0.942744 | 1.828531  |
| F | -0.598323 | -1.177769 | -1.710759 |
| H | -2.037660 | -1.385740 | -0.283119 |
| H | -1.633313 | 0.943601  | -1.514237 |
| F | -2.576323 | 0.913218  | 0.272145  |
| H | 1.111295  | 0.732260  | -1.394389 |
| F | 2.097218  | 1.769283  | 0.027735  |

5\_41

|   |           |           |           |
|---|-----------|-----------|-----------|
| C | 1.483330  | 0.006001  | 0.483013  |
| C | 0.505985  | 1.166784  | 0.263963  |
| C | -0.862736 | 0.722520  | -0.241027 |
| C | -1.246326 | -0.618578 | 0.365882  |
| C | -0.268012 | -1.728571 | -0.040004 |
| C | 1.131069  | -1.212260 | -0.360313 |
| H | 0.372486  | 1.675005  | 1.227856  |
| H | -1.300059 | -0.509301 | 1.456900  |
| H | -0.656598 | -2.215391 | -0.942242 |
| H | -0.210809 | -2.480052 | 0.754023  |
| H | 1.883478  | -2.001018 | -0.243003 |
| H | 2.503219  | 0.354806  | 0.285988  |
| H | -0.858795 | 0.659723  | -1.335408 |
| F | 1.396160  | -0.395320 | 1.823323  |
| F | 1.063046  | 2.072736  | -0.632963 |
| F | -1.803073 | 1.681125  | 0.129994  |
| F | -2.525047 | -0.963539 | -0.071659 |
| F | 1.180828  | -0.783795 | -1.696827 |

5\_42

|   |           |           |           |
|---|-----------|-----------|-----------|
| C | 1.145891  | 0.806150  | 0.367321  |
| C | -0.260552 | 1.358261  | 0.125596  |
| C | -1.269997 | 0.278527  | -0.268428 |
| C | -0.876784 | -1.090295 | 0.268106  |
| C | 0.494705  | -1.528743 | -0.266264 |
| C | 1.405494  | -0.340718 | -0.584803 |
| H | -0.608202 | 1.857142  | 1.037773  |
| H | -0.894561 | -1.068488 | 1.363932  |
| H | 0.333153  | -2.125483 | -1.170656 |
| H | 1.000160  | -2.156005 | 0.474694  |
| H | 1.888726  | 1.603962  | 0.253245  |
| H | -1.344449 | 0.232925  | -1.363635 |
| F | 1.200595  | 0.340318  | 1.686045  |
| F | -0.182333 | 2.305231  | -0.898037 |
| F | -2.523006 | 0.632312  | 0.222388  |
| F | -1.838232 | -2.014569 | -0.140804 |
| F | 2.738614  | -0.738848 | -0.518709 |
| H | 1.231880  | 0.036850  | -1.602466 |

5\_43

|   |           |           |           |
|---|-----------|-----------|-----------|
| C | 1.081414  | 0.615664  | 0.665286  |
| C | -0.395552 | 1.000335  | 0.478689  |
| C | -1.107322 | 0.145139  | -0.559765 |
| C | -0.735526 | -1.317100 | -0.389997 |
| C | 0.758827  | -1.544188 | -0.641852 |
| C | 1.608756  | -0.293725 | -0.439528 |
| H | -0.904313 | 0.888744  | 1.442734  |
| H | 0.926718  | -1.896524 | -1.666326 |
| H | 1.091270  | -2.328860 | 0.046755  |
| H | 1.672472  | 1.538053  | 0.706903  |
| H | -0.829594 | 0.479211  | -1.566420 |
| F | 1.239639  | -0.070936 | 1.869854  |
| F | -0.471316 | 2.337574  | 0.090940  |
| F | -2.483293 | 0.302824  | -0.420407 |
| H | 2.655357  | -0.555218 | -0.243307 |
| F | 1.586716  | 0.475897  | -1.617687 |
| F | -1.040583 | -1.692586 | 0.927354  |
| H | -1.355951 | -1.937108 | -1.047832 |

5\_44

|   |           |           |           |
|---|-----------|-----------|-----------|
| C | 0.830801  | 0.919381  | 0.438000  |
| C | -0.695478 | 1.034355  | 0.293168  |
| C | -1.294012 | -0.073320 | -0.567275 |
| C | -0.619426 | -1.409294 | -0.307508 |
| C | 0.871257  | -1.343547 | -0.672137 |
| C | 1.402426  | 0.090302  | -0.695741 |
| H | -1.148469 | 1.010634  | 1.290203  |
| H | 1.049758  | -1.812719 | -1.645954 |
| H | 1.424444  | -1.905901 | 0.087843  |
| H | 1.265031  | 1.926435  | 0.441468  |
| H | -1.167476 | 0.189304  | -1.627246 |
| F | 1.133574  | 0.312526  | 1.653521  |
| F | -0.991156 | 2.261410  | -0.306801 |
| F | -2.659061 | -0.165407 | -0.323113 |
| F | -0.765106 | -1.714703 | 1.050009  |
| H | -1.137737 | -2.197343 | -0.866683 |
| H | 1.137845  | 0.596185  | -1.635918 |
| F | 2.793215  | 0.071301  | -0.626367 |

5\_45

|   |           |           |           |
|---|-----------|-----------|-----------|
| C | -1.375105 | -0.472684 | -0.363139 |
| C | -0.807008 | 0.923647  | -0.665133 |
| C | 0.666607  | 1.088754  | -0.283708 |
| C | 1.366912  | -0.219763 | -0.601196 |
| C | 0.924122  | -1.324117 | 0.358613  |
| C | -0.583533 | -1.293333 | 0.652477  |
| H | -0.892768 | 1.060170  | -1.751720 |
| H | 1.448916  | -1.179482 | 1.309049  |
| H | 1.215301  | -2.296085 | -0.052663 |
| H | -2.419376 | -0.373166 | -0.046101 |
| F | -1.339263 | -1.207477 | -1.561756 |
| F | -1.569303 | 1.897091  | -0.040026 |
| F | -0.825896 | -0.728429 | 1.906579  |
| F | 2.748997  | -0.057177 | -0.514336 |
| H | -0.995855 | -2.309349 | 0.671202  |
| H | 1.137202  | -0.487260 | -1.641849 |
| H | 1.119801  | 1.923898  | -0.832302 |
| F | 0.789333  | 1.367797  | 1.071416  |

5\_46

|   |           |           |           |
|---|-----------|-----------|-----------|
| C | 1.285845  | 0.502525  | 0.289320  |
| C | 0.041812  | 1.387599  | 0.468654  |
| C | -1.259299 | 0.662544  | 0.107155  |
| C | -1.140993 | -0.776987 | 0.577860  |
| C | -0.094910 | -1.537489 | -0.245844 |
| C | 1.031877  | -0.607784 | -0.712852 |
| H | 0.001899  | 1.675801  | 1.526789  |
| H | -0.594813 | -1.983096 | -1.111505 |
| H | 0.343455  | -2.338027 | 0.358740  |
| H | 2.142290  | 1.119513  | -0.005362 |
| F | 1.573032  | -0.073775 | 1.535784  |
| F | 0.164684  | 2.534803  | -0.301642 |
| F | -2.378398 | -1.409915 | 0.476074  |
| H | -0.866451 | -0.766749 | 1.640980  |
| H | -2.129507 | 1.161123  | 0.550108  |
| F | -1.434813 | 0.680015  | -1.278106 |
| F | 2.201663  | -1.343613 | -0.898107 |
| H | 0.781631  | -0.138642 | -1.671531 |

5\_47

|   |           |           |           |
|---|-----------|-----------|-----------|
| C | 1.354053  | 0.290782  | -0.030514 |
| C | 0.610627  | -0.988996 | -0.382540 |
| C | -0.725221 | -1.056674 | 0.328623  |
| C | -1.646525 | 0.088983  | -0.118027 |
| C | -0.890648 | 1.276290  | -0.716149 |
| C | 0.426564  | 1.517414  | 0.002279  |
| H | 0.432623  | -1.015311 | -1.466682 |
| H | -1.508638 | 2.180041  | -0.682221 |
| H | -0.672902 | 1.057138  | -1.769975 |
| H | 1.842691  | 0.181177  | 0.943619  |
| F | 2.336030  | 0.506790  | -1.001776 |
| F | 1.388994  | -2.093515 | -0.057078 |
| H | -1.216205 | -2.017030 | 0.132164  |
| F | -0.511014 | -0.951383 | 1.704688  |
| H | 0.970127  | 2.359179  | -0.443331 |
| F | 0.156464  | 1.845445  | 1.336785  |
| F | -2.523985 | -0.407469 | -1.090241 |
| H | -2.239200 | 0.389213  | 0.753006  |

5\_48

|   |           |           |           |
|---|-----------|-----------|-----------|
| C | -0.624984 | -1.038478 | 0.374462  |
| C | 0.894429  | -0.860347 | 0.535393  |
| C | 1.459511  | 0.356425  | -0.195782 |
| C | 0.537418  | 1.561149  | -0.015186 |
| C | -0.878673 | 1.293925  | -0.546582 |
| C | -1.164717 | -0.192451 | -0.762774 |
| H | 1.089501  | -0.736364 | 1.606636  |
| H | -1.042405 | 1.833617  | -1.484786 |
| H | -1.586684 | 1.674629  | 0.198135  |
| H | -0.852182 | -2.099096 | 0.214739  |
| F | -1.239035 | -0.638938 | 1.563951  |
| F | 1.557820  | -1.999376 | 0.089560  |
| H | 2.475132  | 0.572423  | 0.155934  |
| F | 1.537806  | 0.104741  | -1.569385 |
| F | 0.497883  | 1.820117  | 1.362851  |
| H | 0.979817  | 2.439489  | -0.498706 |
| H | -0.710972 | -0.551498 | -1.693399 |
| F | -2.542265 | -0.381494 | -0.873171 |

5\_49

|   |           |           |           |
|---|-----------|-----------|-----------|
| C | -1.479080 | 0.518324  | -0.132985 |
| C | -0.265542 | 1.182993  | 0.538445  |
| C | 0.969876  | 0.255452  | 0.577482  |
| C | 0.969638  | -0.735106 | -0.573285 |
| C | -0.262610 | -1.648006 | -0.494493 |
| C | -1.476541 | -0.978688 | 0.148726  |
| H | 1.021691  | -0.193449 | -1.524680 |
| H | -0.003038 | -2.519719 | 0.118286  |
| H | -0.527745 | -2.002973 | -1.495314 |
| H | -2.409376 | -1.448412 | -0.182503 |
| H | -2.409344 | 1.005450  | 0.181354  |
| H | 0.964842  | -0.306113 | 1.520155  |
| F | -1.380961 | 0.656931  | -1.519098 |
| F | 2.119239  | 1.027257  | 0.551353  |
| F | 2.114274  | -1.530332 | -0.485901 |
| F | -1.418473 | -1.115769 | 1.549826  |
| F | 0.028393  | 2.342927  | -0.158763 |
| H | -0.533721 | 1.466275  | 1.562610  |

5\_50

|   |           |           |           |
|---|-----------|-----------|-----------|
| C | -1.234740 | -0.161827 | -0.766799 |
| C | -0.504696 | 1.098013  | -0.276033 |
| C | 0.906434  | 0.768318  | 0.216901  |
| C | 1.466222  | -0.473031 | -0.460893 |
| C | 0.605357  | -1.713883 | -0.181557 |
| C | -0.868561 | -1.380920 | 0.055931  |
| H | -0.433030 | 1.823895  | -1.096227 |
| H | 1.562596  | -0.276674 | -1.538326 |
| H | 0.991115  | -2.200475 | 0.721223  |
| H | 0.699730  | -2.421312 | -1.013156 |
| H | -1.522924 | -2.225206 | -0.192377 |
| H | 0.876364  | 0.618840  | 1.302691  |
| F | -1.219712 | 1.698601  | 0.747878  |
| F | 1.742376  | 1.849754  | -0.049763 |
| F | 2.755280  | -0.707430 | 0.014347  |
| F | -1.063217 | -1.095259 | 1.412882  |
| H | -0.918332 | -0.359451 | -1.802497 |
| F | -2.600906 | 0.056598  | -0.781637 |

5\_51

|   |           |           |           |
|---|-----------|-----------|-----------|
| C | 1.210096  | -0.346007 | -0.439082 |
| C | 0.216645  | -1.316741 | 0.164265  |
| C | -1.218702 | -0.827152 | -0.067095 |
| C | -1.310655 | 0.693905  | -0.139036 |
| C | -0.260772 | 1.342016  | 0.751618  |
| C | 1.148108  | 1.014328  | 0.252100  |
| H | 0.339588  | -2.319498 | -0.260938 |
| H | -1.184770 | 1.009618  | -1.183414 |
| H | -0.380393 | 0.977305  | 1.778273  |
| H | -0.392290 | 2.429327  | 0.751830  |
| H | -1.849336 | -1.191392 | 0.753051  |
| F | 0.435758  | -1.399649 | 1.545043  |
| F | -1.679516 | -1.379722 | -1.263843 |
| F | -2.586221 | 1.092797  | 0.262142  |
| F | 1.545326  | 1.984580  | -0.679613 |
| H | 1.873007  | 1.033593  | 1.073291  |
| F | 2.498633  | -0.863234 | -0.369011 |
| H | 0.960055  | -0.213994 | -1.501174 |

5\_52

|   |           |           |           |
|---|-----------|-----------|-----------|
| C | 1.010025  | -0.086805 | 0.798033  |
| C | 0.107276  | 1.074448  | 0.340250  |
| C | -1.052456 | 0.558813  | -0.512186 |
| C | -1.467233 | -0.842872 | -0.108877 |
| C | -0.333976 | -1.841153 | -0.361463 |
| C | 1.055297  | -1.211704 | -0.219505 |
| H | -0.292339 | 1.603082  | 1.213610  |
| H | -0.412874 | -2.252441 | -1.374228 |
| H | -0.452516 | -2.665930 | 0.350602  |
| H | -0.726409 | 0.544844  | -1.559491 |
| F | 0.839062  | 1.987360  | -0.405727 |
| F | -2.135502 | 1.426663  | -0.406629 |
| H | 1.810879  | -1.953090 | 0.066526  |
| F | 1.445242  | -0.691595 | -1.463019 |
| F | -1.770215 | -0.834604 | 1.267541  |
| H | -2.386899 | -1.131428 | -0.630555 |
| H | 0.591932  | -0.498447 | 1.725416  |
| F | 2.283038  | 0.384293  | 1.073457  |

5\_53

|   |           |           |           |
|---|-----------|-----------|-----------|
| C | -0.835787 | 0.541919  | -0.595409 |
| C | 0.370810  | 1.278872  | -0.049336 |
| C | 1.541249  | 0.326551  | 0.238292  |
| C | 1.095380  | -1.124638 | 0.430574  |
| C | -0.217641 | -1.149218 | 1.200134  |
| C | -1.354692 | -0.468244 | 0.422531  |
| H | 0.692049  | 2.072002  | -0.733810 |
| H | -0.070060 | -0.631297 | 2.156328  |
| H | -0.514791 | -2.181963 | 1.411447  |
| H | 2.010159  | 0.671987  | 1.168653  |
| F | 0.007586  | 1.876869  | 1.168789  |
| F | 2.476921  | 0.405326  | -0.784436 |
| F | 0.902893  | -1.717498 | -0.821812 |
| H | 1.881850  | -1.698709 | 0.935954  |
| H | -2.035981 | 0.047136  | 1.109314  |
| F | -2.104789 | -1.433581 | -0.254347 |
| F | -1.839046 | 1.454641  | -0.909758 |
| H | -0.551232 | 0.017567  | -1.514527 |

6\_1

|   |           |           |           |
|---|-----------|-----------|-----------|
| C | -0.374711 | 1.277686  | 0.683284  |
| C | -0.959582 | 0.923090  | -0.683282 |
| C | -0.138929 | -0.084229 | -1.487740 |
| C | 0.374711  | -1.277686 | -0.683284 |
| C | 0.959582  | -0.923090 | 0.683282  |
| C | 0.138929  | 0.084229  | 1.487740  |
| H | -0.760719 | -0.461209 | -2.309797 |
| H | -1.051425 | 1.845023  | -1.271599 |
| H | -1.149673 | 1.785455  | 1.271602  |
| H | 1.149673  | -1.785455 | -1.271602 |
| H | 1.051425  | -1.845023 | 1.271599  |
| H | 0.760719  | 0.461209  | 2.309797  |
| F | 0.688502  | 2.154017  | 0.483916  |
| F | -2.228252 | 0.385639  | -0.483914 |
| F | 0.960590  | 0.582391  | -2.021406 |
| F | -0.688502 | -2.154017 | -0.483916 |
| F | 2.228252  | -0.385639 | 0.483914  |
| F | -0.960590 | -0.582391 | 2.021407  |

6\_2

|   |           |           |           |
|---|-----------|-----------|-----------|
| C | 0.441276  | 0.503717  | 1.272129  |
| C | -0.407570 | -0.769441 | 1.290635  |
| C | -1.189208 | -1.029132 | 0.000000  |
| C | -0.407570 | -0.769441 | -1.290635 |
| C | 0.441276  | 0.503717  | -1.272129 |
| C | 1.270233  | 0.562870  | 0.000000  |
| H | -1.509388 | -2.079093 | 0.000000  |
| H | -1.116388 | -0.721106 | 2.126134  |
| H | 1.108787  | 0.505599  | 2.143577  |
| H | -1.116388 | -0.721106 | -2.126134 |
| H | 1.108787  | 0.505599  | -2.143577 |
| F | -0.407570 | 1.595548  | 1.378082  |
| F | 0.458486  | -1.847083 | 1.491772  |
| F | -2.315165 | -0.214367 | 0.000000  |
| F | 0.458486  | -1.847083 | -1.491772 |

|   |           |           |           |
|---|-----------|-----------|-----------|
| F | -0.407570 | 1.595548  | -1.378082 |
| F | 2.069973  | 1.697074  | 0.000000  |
| H | 1.924203  | -0.320351 | 0.000000  |

6\_3

|   |           |           |           |
|---|-----------|-----------|-----------|
| C | -0.921098 | 1.154619  | -0.143700 |
| C | -0.656295 | 0.395092  | -1.443607 |
| C | 0.656295  | -0.395092 | -1.443607 |
| C | 0.921098  | -1.154619 | -0.143700 |
| C | 0.707410  | -0.277466 | 1.082523  |
| C | -0.707410 | 0.277466  | 1.082523  |
| H | 0.635515  | -1.107783 | -2.277112 |
| H | -0.635515 | 1.107783  | -2.277112 |
| H | -1.942005 | 1.555846  | -0.147920 |
| H | 1.942005  | -1.555846 | -0.147920 |
| F | -0.033217 | 2.229613  | -0.099612 |
| F | -1.707324 | -0.499294 | -1.637451 |
| F | 1.707324  | 0.499294  | -1.637451 |
| F | 0.033217  | -2.229613 | -0.099612 |
| F | -0.921098 | 1.038018  | 2.223502  |
| H | -1.431122 | -0.546664 | 1.075777  |
| H | 1.431122  | 0.546664  | 1.075777  |
| F | 0.921098  | -1.038018 | 2.223502  |

6\_4

|   |           |           |           |
|---|-----------|-----------|-----------|
| C | 0.807355  | -0.168203 | 1.287621  |
| C | 1.625871  | -0.028020 | 0.000000  |
| C | 0.807355  | -0.168203 | -1.287621 |
| C | -0.437347 | 0.708965  | -1.231424 |
| C | -1.300656 | 0.461620  | 0.000000  |
| C | -0.437347 | 0.708965  | 1.231424  |
| H | 1.427742  | 0.139772  | -2.139507 |
| H | 2.431746  | -0.770856 | 0.000000  |
| H | 1.427742  | 0.139772  | 2.139507  |
| F | 0.477723  | -1.502352 | 1.455031  |
| F | 2.187962  | 1.256303  | 0.000000  |
| F | 0.477723  | -1.502352 | -1.455031 |
| H | -0.092068 | 1.752361  | -1.192219 |
| F | -1.185823 | 0.549776  | -2.386364 |
| F | -1.185823 | 0.549776  | 2.386364  |
| H | -0.092068 | 1.752361  | 1.192219  |
| H | -2.153892 | 1.153460  | 0.000000  |
| F | -1.809605 | -0.824218 | 0.000000  |

6\_5

|   |           |           |           |
|---|-----------|-----------|-----------|
| C | -1.277347 | -0.925377 | -0.026467 |
| C | 0.000000  | -1.651587 | 0.398876  |
| C | 1.277347  | -0.925377 | -0.026467 |
| C | 1.239978  | 0.542980  | 0.372599  |
| C | 0.000000  | 1.248449  | -0.158522 |
| C | -1.239978 | 0.542980  | 0.372599  |
| H | 2.149119  | -1.411478 | 0.429063  |
| H | 0.000000  | -2.666868 | -0.014017 |
| H | -2.149119 | -1.411478 | 0.429063  |
| F | -1.394120 | -1.031800 | -1.408002 |
| F | 0.000000  | -1.725563 | 1.796174  |
| F | 1.394120  | -1.031800 | -1.408002 |
| H | 0.000000  | 1.275918  | -1.254118 |

|   |           |          |           |
|---|-----------|----------|-----------|
| F | 0.000000  | 2.556269 | 0.313459  |
| H | 1.243845  | 0.611286 | 1.469271  |
| F | 2.382103  | 1.171943 | -0.098162 |
| F | -2.382103 | 1.171943 | -0.098162 |
| H | -1.243845 | 0.611286 | 1.469271  |

6\_6

|   |           |           |           |
|---|-----------|-----------|-----------|
| C | 0.764150  | 1.277588  | 0.052754  |
| C | -0.764150 | 1.277588  | -0.052754 |
| C | -1.238494 | 0.000000  | -0.731542 |
| C | -0.764150 | -1.277588 | -0.052754 |
| C | 0.764150  | -1.277588 | 0.052754  |
| C | 1.238494  | 0.000000  | 0.731542  |
| H | -1.101857 | 2.146469  | -0.630660 |
| H | 1.101857  | 2.146469  | 0.630660  |
| F | 1.279525  | 1.390087  | -1.235450 |
| F | -1.279525 | 1.390087  | 1.235450  |
| H | 1.101857  | -2.146469 | 0.630659  |
| F | 1.279525  | -1.390087 | -1.235450 |
| H | -0.812876 | 0.000000  | -1.744174 |
| F | -2.622159 | 0.000000  | -0.835901 |
| H | -1.101857 | -2.146469 | -0.630659 |
| F | -1.279525 | -1.390087 | 1.235450  |
| F | 2.622159  | 0.000000  | 0.835901  |
| H | 0.812876  | 0.000000  | 1.744174  |

6\_7

|   |           |           |           |
|---|-----------|-----------|-----------|
| C | -0.452383 | -1.471081 | 0.156921  |
| C | 1.045843  | -1.166215 | 0.200116  |
| C | 1.354482  | 0.011713  | -0.717981 |
| C | 0.518651  | 1.248206  | -0.414169 |
| C | -0.962991 | 0.891224  | -0.497967 |
| C | -1.283827 | -0.234279 | 0.474515  |
| H | 1.617694  | -2.043750 | -0.125596 |
| H | -0.702355 | -2.281089 | 0.851584  |
| F | -0.745152 | -1.905628 | -1.141751 |
| F | 1.388248  | -0.891350 | 1.517793  |
| H | 1.116982  | -0.309956 | -1.741848 |
| F | 2.704453  | 0.319507  | -0.664005 |
| H | 0.759789  | 2.050750  | -1.122716 |
| F | 0.799577  | 1.721339  | 0.862396  |
| F | -2.629974 | -0.562168 | 0.387804  |
| H | -1.069844 | 0.093308  | 1.499068  |
| H | -1.217289 | 0.579157  | -1.519192 |
| F | -1.719777 | 2.010986  | -0.190004 |

6\_8

|   |           |           |           |
|---|-----------|-----------|-----------|
| C | -0.401002 | -0.649797 | -1.441273 |
| C | 0.401002  | 0.649797  | -1.441273 |
| C | 0.082738  | 1.460379  | -0.194167 |
| C | 0.361357  | 0.671234  | 1.076643  |
| C | -0.361357 | -0.671234 | 1.076643  |
| C | -0.082738 | -1.460379 | -0.194167 |
| H | 0.195740  | 1.242743  | -2.339998 |
| H | -0.195740 | -1.242743 | -2.339998 |
| F | -1.754821 | -0.302993 | -1.446510 |
| F | 1.754821  | 0.302993  | -1.446510 |

|   |           |           |           |
|---|-----------|-----------|-----------|
| H | 1.441203  | 0.515109  | 1.192300  |
| F | -0.082738 | 1.411546  | 2.166230  |
| H | -0.976398 | 1.746974  | -0.218475 |
| F | 0.843950  | 2.620600  | -0.195392 |
| F | -0.843950 | -2.620600 | -0.195392 |
| H | 0.976398  | -1.746974 | -0.218475 |
| H | -1.441203 | -0.515109 | 1.192300  |
| F | 0.082738  | -1.411546 | 2.166230  |

6\_9

|   |           |           |           |
|---|-----------|-----------|-----------|
| C | 0.813060  | 1.269700  | -0.195251 |
| C | 1.424652  | 0.000000  | -0.776396 |
| C | 0.813060  | -1.269700 | -0.195251 |
| C | -0.693259 | -1.247145 | -0.431304 |
| C | -1.342267 | 0.000000  | 0.156418  |
| C | -0.693259 | 1.247145  | -0.431304 |
| H | 1.257332  | 2.153792  | -0.670429 |
| F | 1.062077  | 1.355767  | 1.165854  |
| H | 1.228777  | 0.000000  | -1.860063 |
| F | 2.796507  | 0.000000  | -0.593815 |
| F | 1.062077  | -1.355767 | 1.165854  |
| H | 1.257332  | -2.153792 | -0.670429 |
| F | -2.688790 | 0.000000  | -0.190482 |
| H | -1.264003 | 0.000000  | 1.249586  |
| F | -1.261844 | -2.379369 | 0.127186  |
| H | -0.892516 | -1.273034 | -1.513094 |
| H | -0.892516 | 1.273034  | -1.513094 |
| F | -1.261844 | 2.379369  | 0.127186  |

6\_10

|   |           |           |           |
|---|-----------|-----------|-----------|
| C | -0.645633 | -1.302158 | 0.000000  |
| C | -0.622558 | -0.438167 | 1.255135  |
| C | 0.622558  | 0.438167  | 1.255135  |
| C | 0.645633  | 1.302158  | 0.000000  |
| C | 0.622558  | 0.438167  | -1.255135 |
| C | -0.622558 | -0.438167 | -1.255135 |
| H | -1.518760 | -1.965200 | 0.000000  |
| F | 0.496545  | -2.110125 | 0.000000  |
| H | -1.517493 | 0.195533  | 1.294516  |
| F | -0.622558 | -1.258247 | 2.373238  |
| F | 0.622558  | 1.258247  | 2.373238  |
| H | 1.517493  | -0.195533 | 1.294516  |
| H | 1.518760  | 1.965200  | 0.000000  |
| F | -0.496545 | 2.110125  | 0.000000  |
| F | -0.622558 | -1.258247 | -2.373238 |
| H | -1.517493 | 0.195533  | -1.294516 |
| H | 1.517493  | -0.195533 | -1.294516 |
| F | 0.622558  | 1.258247  | -2.373238 |

6\_11

|   |           |           |           |
|---|-----------|-----------|-----------|
| C | -0.193944 | -1.533962 | 0.000000  |
| C | -0.568357 | -0.739209 | 1.240201  |
| C | 0.189310  | 0.579418  | 1.277654  |
| C | -0.030022 | 1.381532  | 0.000000  |
| C | 0.189310  | 0.579418  | -1.277654 |
| C | -0.568357 | -0.739209 | -1.240201 |
| H | -0.682872 | -2.515530 | 0.000000  |
| F | 1.186767  | -1.743832 | 0.000000  |
| H | -1.650058 | -0.541769 | 1.239830  |
| F | -0.273553 | -1.478047 | 2.374876  |

|   |           |           |           |
|---|-----------|-----------|-----------|
| F | -0.273553 | 1.333440  | 2.349983  |
| H | 1.258547  | 0.391035  | 1.429969  |
| H | 1.258547  | 0.391035  | -1.429969 |
| F | -0.273553 | 1.333440  | -2.349983 |
| H | -1.053485 | 1.782296  | 0.000000  |
| F | 0.842082  | 2.462687  | 0.000000  |
| F | -0.273553 | -1.478047 | -2.374876 |
| H | -1.650058 | -0.541769 | -1.239830 |

6\_12

|   |           |           |           |
|---|-----------|-----------|-----------|
| C | -0.380147 | -1.273380 | -0.632588 |
| C | -1.070075 | -0.788002 | 0.632588  |
| C | -0.171647 | 0.120758  | 1.456753  |
| C | 0.380147  | 1.273380  | 0.632588  |
| C | 1.070075  | 0.788002  | -0.632588 |
| C | 0.171647  | -0.120758 | -1.456753 |
| H | -1.996861 | -0.258716 | 0.371902  |
| F | -1.414878 | -1.890359 | 1.402558  |
| F | -0.910704 | 0.640698  | 2.510504  |
| H | 0.656237  | -0.461674 | 1.883855  |
| H | 1.996861  | 0.258716  | -0.371902 |
| F | 1.414877  | 1.890359  | -1.402558 |
| H | -0.431130 | 1.966854  | 0.371901  |
| F | 1.301196  | 1.970337  | 1.402557  |
| F | 0.910704  | -0.640698 | -2.510504 |
| H | -0.656237 | 0.461674  | -1.883855 |
| H | 0.431130  | -1.966854 | -0.371901 |
| F | -1.301196 | -1.970337 | -1.402557 |

6\_13

|   |           |           |           |
|---|-----------|-----------|-----------|
| C | -0.571861 | -1.378831 | -0.502644 |
| C | -1.461216 | -0.136026 | -0.385451 |
| C | -0.734973 | 1.070262  | 0.201027  |
| C | 0.734973  | 1.070262  | -0.201027 |
| C | 1.461216  | -0.136026 | 0.385451  |
| C | 0.571861  | -1.378831 | 0.502644  |
| H | -1.810605 | 0.121380  | -1.393476 |
| H | 0.830058  | 1.064668  | -1.294097 |
| H | 1.810605  | 0.121380  | 1.393476  |
| H | 1.191632  | -2.276366 | 0.396386  |
| H | -1.191632 | -2.276366 | -0.396386 |
| H | -0.830058 | 1.064668  | 1.294097  |
| F | 0.011630  | -1.377195 | -1.773290 |
| F | -2.569076 | -0.436401 | 0.399357  |
| F | -1.334628 | 2.231140  | -0.273127 |
| F | 1.334628  | 2.231140  | 0.273127  |
| F | 2.569076  | -0.436401 | -0.399358 |
| F | -0.011630 | -1.377195 | 1.773290  |

6\_14

|   |           |           |           |
|---|-----------|-----------|-----------|
| C | -0.555678 | -1.336048 | 0.369192  |
| C | 0.965061  | -1.254696 | 0.209600  |
| C | 1.447822  | 0.121289  | -0.255731 |
| C | 0.491237  | 1.237367  | 0.145508  |
| C | -0.915867 | 1.033305  | -0.424520 |
| C | -1.205536 | -0.453557 | -0.675335 |
| H | 1.437215  | -1.495859 | 1.168876  |
| H | 0.420972  | 1.296700  | 1.238034  |

|   |           |           |           |
|---|-----------|-----------|-----------|
| H | -1.004548 | 1.592286  | -1.364557 |
| H | -0.886738 | -2.376143 | 0.269838  |
| H | 1.570323  | 0.111617  | -1.347412 |
| F | -0.876668 | -0.887058 | 1.650077  |
| F | 1.353335  | -2.208400 | -0.732849 |
| F | 2.696361  | 0.375447  | 0.299337  |
| F | 1.002025  | 2.443965  | -0.320359 |
| F | -1.843294 | 1.558041  | 0.461233  |
| F | -2.568676 | -0.668818 | -0.749850 |
| H | -0.767205 | -0.733167 | -1.645357 |

6\_15

|   |           |           |           |
|---|-----------|-----------|-----------|
| C | 1.212855  | -1.013461 | 0.506253  |
| C | 1.455189  | 0.444139  | 0.087843  |
| C | 0.179168  | 1.181604  | -0.310346 |
| C | -0.978942 | 0.696677  | 0.550515  |
| C | -1.284885 | -0.802537 | 0.332652  |
| C | -0.046184 | -1.585245 | -0.131044 |
| H | 1.902230  | 0.965184  | 0.944624  |
| H | -0.715921 | 0.854074  | 1.605136  |
| H | 2.096651  | -1.608133 | 0.251482  |
| H | -0.034265 | 1.038316  | -1.375161 |
| F | 1.024798  | -1.055272 | 1.895160  |
| F | 2.364148  | 0.470398  | -0.962529 |
| F | 0.367521  | 2.542414  | -0.086707 |
| F | -2.111433 | 1.442387  | 0.285119  |
| H | -0.162794 | -2.655488 | 0.075143  |
| F | 0.110570  | -1.431609 | -1.506778 |
| F | -2.272879 | -0.955832 | -0.622823 |
| H | -1.653639 | -1.233392 | 1.270555  |

6\_16

|   |           |           |           |
|---|-----------|-----------|-----------|
| C | -0.982054 | -1.186415 | 0.307640  |
| C | 0.458948  | -1.503901 | -0.106201 |
| C | 1.342143  | -0.261203 | -0.252964 |
| C | 0.781345  | 0.899656  | 0.555713  |
| C | -0.605676 | 1.303294  | 0.033893  |
| C | -1.447105 | 0.086820  | -0.363319 |
| H | 0.902246  | -2.164699 | 0.647928  |
| H | 0.704165  | 0.613470  | 1.610945  |
| H | -1.635807 | -2.026161 | 0.046677  |
| H | 1.408906  | 0.022605  | -1.311269 |
| F | -1.012177 | -1.027446 | 1.697842  |
| F | 0.410283  | -2.183741 | -1.323846 |
| F | 2.624670  | -0.562160 | 0.190173  |
| F | 1.633522  | 1.985441  | 0.469868  |
| F | -0.444400 | 2.099661  | -1.098892 |
| H | -1.137991 | 1.895159  | 0.786748  |
| H | -1.340363 | -0.052183 | -1.448042 |
| F | -2.788205 | 0.319611  | -0.088652 |

6\_17

|   |           |           |           |
|---|-----------|-----------|-----------|
| C | 0.084281  | -1.265149 | 0.674177  |
| C | 1.304792  | -0.362601 | 0.421959  |
| C | 1.024588  | 0.753170  | -0.576833 |
| C | -0.336927 | 1.367814  | -0.302837 |
| C | -1.410738 | 0.348484  | -0.689999 |
| C | -1.025243 | -1.102837 | -0.361775 |
| H | 1.611737  | 0.078669  | 1.376450  |
| H | 0.426393  | -2.306910 | 0.665231  |

|   |           |           |           |
|---|-----------|-----------|-----------|
| H | 1.049101  | 0.345096  | -1.596235 |
| F | -0.458821 | -0.986295 | 1.923920  |
| F | 2.353115  | -1.141190 | -0.064563 |
| F | 2.014006  | 1.723927  | -0.481150 |
| H | -1.919888 | -1.652458 | -0.048069 |
| H | -1.549188 | 0.392702  | -1.778531 |
| F | -2.609544 | 0.676873  | -0.080538 |
| F | -0.532250 | -1.678156 | -1.542985 |
| F | -0.433212 | 1.672228  | 1.051358  |
| H | -0.462324 | 2.303131  | -0.861390 |

6\_18

|   |           |           |           |
|---|-----------|-----------|-----------|
| C | 0.248307  | -1.401406 | 0.557590  |
| C | 1.357238  | -0.425722 | 0.125742  |
| C | 0.823466  | 0.798743  | -0.606225 |
| C | -0.411762 | 1.347782  | 0.086794  |
| C | -1.543261 | 0.310214  | 0.174766  |
| C | -1.089882 | -1.117870 | -0.120027 |
| H | 1.897735  | -0.101884 | 1.022607  |
| H | 0.578991  | -2.420657 | 0.328431  |
| H | 0.572566  | 0.531239  | -1.638507 |
| F | 0.039961  | -1.293224 | 1.934231  |
| F | 2.247645  | -1.096056 | -0.709521 |
| F | 1.808118  | 1.778883  | -0.642956 |
| F | -0.057330 | 1.711161  | 1.389993  |
| H | -0.775049 | 2.243212  | -0.430008 |
| F | -0.891832 | -1.284104 | -1.491858 |
| H | -1.854480 | -1.837224 | 0.195583  |
| H | -1.929184 | 0.345731  | 1.199952  |
| F | -2.568252 | 0.646577  | -0.700988 |

6\_19

|   |           |           |           |
|---|-----------|-----------|-----------|
| C | -0.311765 | -1.380864 | 0.245729  |
| C | 1.145252  | -0.975821 | -0.030564 |
| C | 1.276258  | 0.471296  | -0.492496 |
| C | 0.311764  | 1.380863  | 0.245734  |
| C | -1.145252 | 0.975822  | -0.030562 |
| C | -1.276258 | -0.471294 | -0.492497 |
| H | 1.732181  | -1.127883 | 0.881806  |
| H | -0.457225 | -2.422421 | -0.063647 |
| H | 1.055679  | 0.525590  | -1.567988 |
| F | -0.561470 | -1.293506 | 1.613288  |
| F | 1.649640  | -1.803242 | -1.035155 |
| F | 2.581811  | 0.905506  | -0.309935 |
| F | 0.561468  | 1.293498  | 1.613292  |
| H | 0.457226  | 2.422422  | -0.063638 |
| H | -1.732183 | 1.127884  | 0.881806  |
| F | -1.649638 | 1.803245  | -1.035154 |
| F | -2.581812 | -0.905504 | -0.309937 |
| H | -1.055680 | -0.525585 | -1.567989 |

6\_20

|   |           |           |           |
|---|-----------|-----------|-----------|
| C | 0.187165  | -1.431431 | 0.286759  |
| C | 1.449035  | -0.591487 | 0.546008  |
| C | 1.279453  | 0.880475  | 0.148991  |
| C | -0.132450 | 1.315678  | 0.496596  |
| C | -1.165556 | 0.610274  | -0.384983 |
| C | -0.673392 | -0.793550 | -0.787623 |

|   |           |           |           |
|---|-----------|-----------|-----------|
| H | 1.655641  | -0.643925 | 1.622317  |
| H | -0.345182 | 1.056114  | 1.541953  |
| H | -1.352151 | 1.214468  | -1.280183 |
| H | 0.472125  | -2.451485 | 0.005104  |
| F | -0.532075 | -1.491994 | 1.484325  |
| F | 2.524908  | -1.130737 | -0.142374 |
| F | -0.251494 | 2.693125  | 0.360545  |
| F | -2.357479 | 0.517777  | 0.318251  |
| H | 2.021478  | 1.514594  | 0.647174  |
| F | 1.472749  | 1.023177  | -1.227925 |
| F | -1.752624 | -1.603905 | -1.091027 |
| H | -0.053310 | -0.696505 | -1.687010 |

6\_21

|   |           |           |           |
|---|-----------|-----------|-----------|
| C | -1.456913 | 0.491297  | 0.206409  |
| C | -1.285673 | -1.036012 | 0.270783  |
| C | 0.174352  | -1.476601 | 0.105788  |
| C | 1.042320  | -0.461503 | 0.830373  |
| C | 1.031362  | 0.906337  | 0.120211  |
| C | -0.322100 | 1.156708  | -0.547951 |
| H | -1.644998 | -1.357872 | 1.256362  |
| H | 0.629558  | -0.324366 | 1.839134  |
| H | -2.424077 | 0.737541  | -0.245190 |
| F | -1.458137 | 0.972936  | 1.525321  |
| F | -2.065381 | -1.634938 | -0.705519 |
| F | 2.339151  | -0.923370 | 0.959238  |
| H | 0.333649  | -2.486636 | 0.501312  |
| F | 0.502129  | -1.500680 | -1.246842 |
| F | 2.024313  | 0.951112  | -0.845581 |
| H | 1.233386  | 1.704287  | 0.844446  |
| H | -0.285938 | 0.746461  | -1.564010 |
| F | -0.557815 | 2.523743  | -0.636142 |

6\_22

|   |           |           |           |
|---|-----------|-----------|-----------|
| C | 1.134858  | 0.534778  | 0.540556  |
| C | -0.043203 | 1.481402  | 0.281918  |
| C | -1.301328 | 0.737087  | -0.185122 |
| C | -1.301328 | -0.737088 | 0.185122  |
| C | -0.043202 | -1.481402 | -0.281917 |
| C | 1.134858  | -0.534778 | -0.540556 |
| H | -0.276289 | 2.066553  | 1.178875  |
| H | -1.378933 | -0.842077 | 1.275196  |
| H | -0.276288 | -2.066555 | -1.178874 |
| H | -1.378932 | 0.842077  | -1.275196 |
| F | 0.322035  | 2.373939  | -0.723918 |
| F | -2.424482 | 1.334944  | 0.375482  |
| F | -2.424482 | -1.334945 | -0.375482 |
| F | 0.322036  | -2.373939 | 0.723919  |
| F | 2.311818  | -1.254912 | -0.537960 |
| H | 1.028907  | -0.062740 | -1.527358 |
| H | 1.028908  | 0.062740  | 1.527358  |
| F | 2.311818  | 1.254912  | 0.537959  |
